# Supplementary material
Source: PubMed Central journal article supplement (PMC7446107)
Supplement: NIHMS1613069-supplement-SUP_TABLE_1.pdf [file NIHMS1613069-supplement-SUP_TABLE_1.pdf]

**Supplementary Table 1. Patient characteristics**

| Patient ID | Cancer type      | Prior therapy                      | Months from end of last therapy to leukapheresis (mo) | %PD-1 <sup>+</sup> (of CD8 <sup>+</sup> ) PBMC | # putative mutations <sup>d</sup> | Mutations evaluated <sup>e</sup> |
|------------|------------------|------------------------------------|-------------------------------------------------------|------------------------------------------------|-----------------------------------|----------------------------------|
| NCI-3713   | Mel <sup>a</sup> | IL-2, anti-CTLA-4                  | 7 mo                                                  | 4.1%                                           | 4359                              | 7 minimal epitopes               |
| NCI-3998   | Mel              | No treatment                       | -                                                     | 1.9%                                           | 279                               | 115 (TMG#1-7)                    |
| NCI-3784   | Mel              | Surgery, IFN                       | 14 mo                                                 | 2.1%                                           | 440                               | 140 (TMG1-9)                     |
| NCI-3903   | Mel              | Surgery, MART-F5 TCR <sup>b</sup>  | 55 mo                                                 | 3.4%                                           | 414                               | 308 (TMG#1-26)                   |
| NCI-3926   | Mel              | IL-2, surgery, chemo. <sup>c</sup> | 8 mo                                                  | 7.4%                                           | 346                               | 128 (TMG#1-11)                   |
| NCI-3759*  | Mel              | Surgery, IFN                       | 1 mo                                                  | 1.0%                                           | n.d. <sup>f</sup>                 | n.e. <sup>g</sup>                |
| NCI-3992*  | Mel              | Anti-PD-1, anti-CTLA-4             | 5 mo                                                  | 8%                                             | n.d.                              | n.e.                             |

<sup>a</sup>Melanoma; <sup>b</sup> Adoptive transfer of autologous T cells that were gene-engineered to express a MART1 HLA-A\*0201-restricted T cell receptor (TCR). <sup>c</sup>Chemotherapy NCI- 3926: dacarbazine and vinblastine. <sup>d</sup>Putative non-synonymous mutations were defined by: >2 exome variant reads, ≥ 10% variant frequency in the exome, ≥10 normal reads, and tumor/normal variant frequency ≥5. Common single nucleotide polymorphisms were filtered. <sup>e</sup>Mutations screened were selected based on whole-exome and transcriptome analysis. <sup>f</sup>Not determined. <sup>g</sup>Not evaluated. \*NCI-3759 and 3992 were only included in Fig.4i
