# Supplementary material
Source: PubMed Central journal article supplement (PMC7446107)
Supplement: NIHMS1613069-supplement-SUPP_FIG_3.pdf [file NIHMS1613069-supplement-SUPP_FIG_3.pdf]

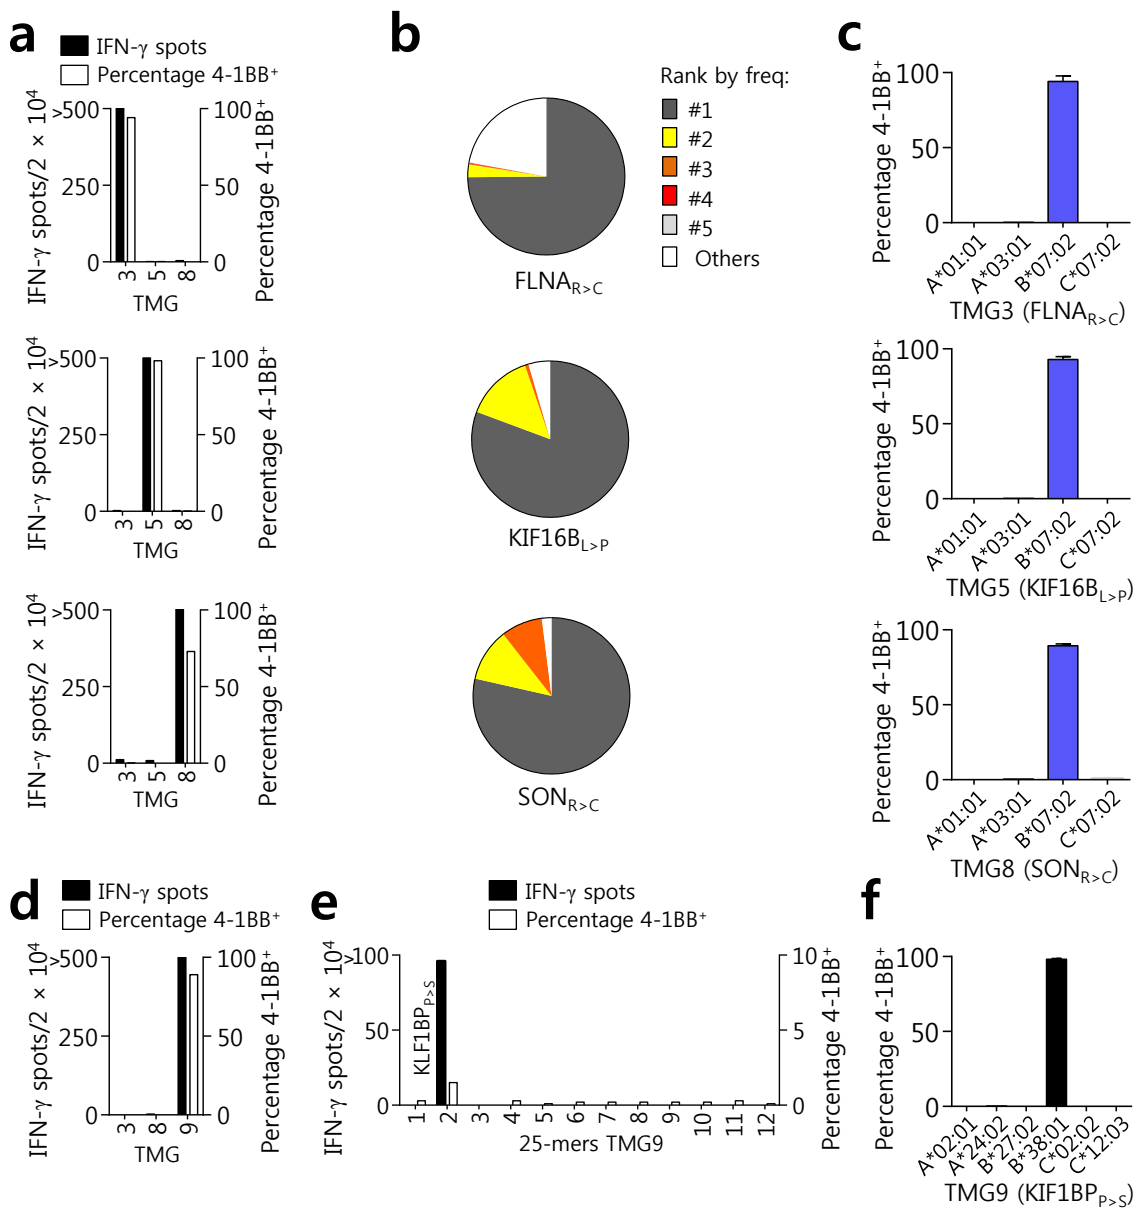

**Supplementary Figure 3** Characterization of neoantigen-reactive lymphocytes isolated from the circulating CD8<sup>+</sup>PD1<sup>+</sup> subset of subjects NCI-3784, and 3903. Enriched populations of TMG-reactive cells were generated by selecting 4-1BB<sup>+</sup> lymphocytes and expanding the cells *in vitro* for 15 d. **(a–c)** NCI-3784 TMG3- (top), TMG5- (middle), and TMG8-reactive (bottom) lymphocytes, recognizing FLNA<sub>R>C</sub>, KIF16B<sub>L>P</sub>, or SON<sub>R>C</sub>, respectively, were cocultured with DCs transfected with the indicated TMGs **(a)**. IFN- $\gamma$  ELISPOT assay and flow cytometry detection of 4-1BB upregulation at 20 h are shown. Data are gated on CD3<sup>+</sup>CD8<sup>+</sup> cells. **(b)** TRB deep sequencing of the TMG-enriched populations. Data show the frequency of the top five TRB clonotypes (unique V-D-J sequences) for each population. **(c)** TMG3-, TMG5- and TMG8-reactive lymphocytes were co-incubated with COS7 cotransfected with the corresponding constructs expressing the indicated TMG and individual HLA alleles encoding the HLA class I molecules indicated on the x axis (such as HLA-A\*01:01). Flow cytometry detection of 4-1BB at 20 h after the coculture is shown. Data are gated on CD3<sup>+</sup>CD8<sup>+</sup>. **(d–f)** NCI-3903 TMG9-reactive cells were cocultured with DCs transfected with the indicated TMGs **(d)**, DCs pulsed with the individual 25-mers encoded by 3903 TMG9 **(e)**, or COS7 cells co-transfected with TMG9 and DNA constructs encoding for the HLA-I molecules indicated in the x axis **(f)**. IFN- $\gamma$  ELISPOT assay and or flow cytometry detection of 4-1BB upregulation are shown. Data are gated on CD3<sup>+</sup>CD8<sup>+</sup> cells. “>” denotes greater than 500 spots /2  $\times 10^4$  cells. Data are representative of at least two independent experiments.
