# Supplementary material
Source: PubMed Central journal article supplement (PMC7446107)
Supplement: NIHMS1613069-supplement-SUPP_FIG_4.pdf [file NIHMS1613069-supplement-SUPP_FIG_4.pdf]

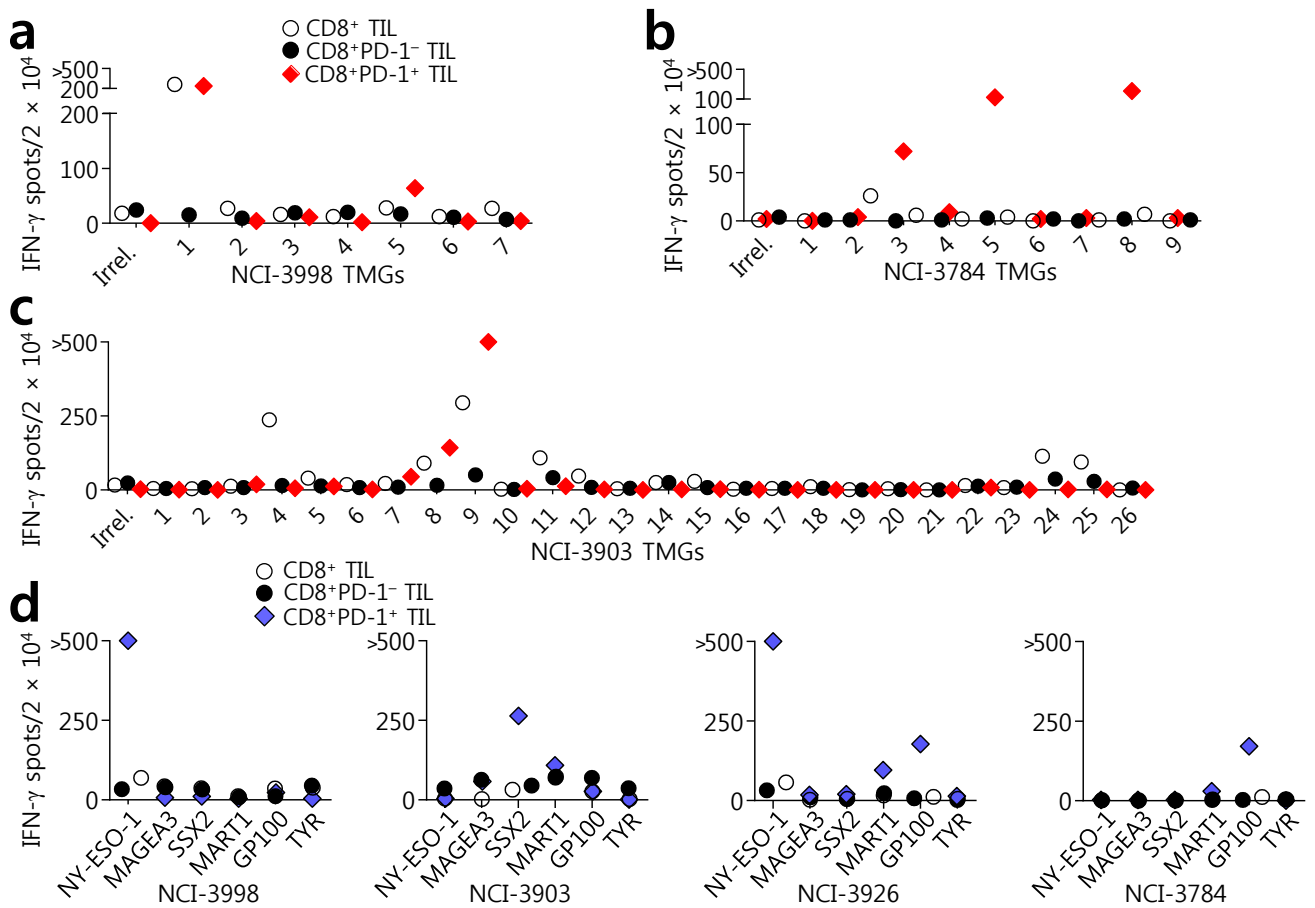

**Supplementary Figure 4** Immunological screening of tumor-derived lymphocytes for recognition of mutated neoantigens and shared tumor antigens. **(a–d)** NCI-3998, 3784 and 3903 CD8<sup>+</sup> lymphocytes were separated from fresh tumor single cell suspensions based on PD-1 expression, and expanded *in vitro*. Tumor-infiltrating lymphocyte (TIL) subsets from NCI-3998 **(a)**, NCI-3784 **(b)**, and NCI-3903 **(c)** were cocultured with autologous dendritic cells (DCs) transfected with an irrelevant TMG (Irrel.) or the indicated TMG constructs. IFN- $\gamma$  spots/ $2 \times 10^4$  cells is shown. **(d)** TIL subsets from subjects (indicated below each graph) were cocultured with autologous DCs transfected with full-length RNA encoding for NY-ESO-1, MAGEA3, MART1, GP100, and TYR. IFN- $\gamma$  spots/ $2 \times 10^4$  cells at 20 h is shown. “>” denotes greater than 500 spots /  $2 \times 10^4$  cells. Data are representative of at least two independent experiments.
