# Supplementary material
Source: PubMed Central journal article supplement (PMC7446107)
Supplement: NIHMS1613069-supplement-SUPP_TABLE_3.pdf [file NIHMS1613069-supplement-SUPP_TABLE_3.pdf]

**Supplementary Table 3. Binding affinity of candidate immunogenic peptides to the patient-specific HLA-I molecules based on prediction algorithms**

| Patient ID | Mutated protein                | Wild-type epitope | Mutated epitope              | Affinity wild-type (nM) | Affinity mutant (nM) | Rank wild-type (%-tile) | Rank mutant (%-tile) | Allele  |
|------------|--------------------------------|-------------------|------------------------------|-------------------------|----------------------|-------------------------|----------------------|---------|
| NCI-3998   | MAGEA6 <sub>E168K</sub>        | EVDPIGHVYI        | <b>K</b> VDPIGHVYI           | 12                      | 6                    | 0.4                     | 0.2                  | C*05:01 |
|            |                                | EVDPIGHVYIF       | <b>K</b> VDPIGHVYIF          | 9                       | 5                    | 0.3                     | 0.2                  | C*05:01 |
|            |                                | EVDPIGHVY         | <b>K</b> VDPIGHVY            | 36                      | 77                   | 0.35                    | 0.3                  | A*01:01 |
|            |                                | LMEVDPIGHVY       | <b>L</b> M <b>K</b> VDPIGHVY | 394                     | 47                   | 2.8                     | 0.5                  | B*15:01 |
|            | PDSA5 <sub>Y1000F;H1007Y</sub> | PEYVVPYMIH        | <b>P</b> EFVVPYMIY           | 6823                    | 105                  | 4.05                    | 0.25                 | B*18:01 |
|            |                                | YVVPYMIHLL        | <b>F</b> VVPYMIYLL           | 6                       | 6                    | 0.4                     | 0.4                  | C*03:03 |
|            |                                | SLLPEYVVPY        | SLL <b>P</b> EFVVPY          | 29                      | 23                   | 0.55                    | 0.5                  | B*15:01 |
|            |                                | LSLLPEYVVPY       | LSLL <b>P</b> EFVVPY         | 3278                    | 3232                 | 0.7                     | 0.7                  | A*01:01 |
|            |                                | LLPEYVVPY         | LL <b>P</b> EFVVPY           | 43                      | 58                   | 0.6                     | 0.5                  | B*15:01 |
|            |                                | YMIHLLAH          | YMI <b>Y</b> LLAH            | 93                      | 74                   | 1.1                     | 0.9                  | B*15:01 |
|            | MED13 <sub>P1691S</sub>        | VQIIPCQY          | <b>V</b> QIISCQY             | 253                     | 165                  | 0.75                    | 0.55                 | A*30:02 |
|            |                                | VQIIPCQY          | <b>V</b> QIISCQY             | 81                      | 48                   | 0.9                     | 0.6                  | B*15:01 |
|            |                                | VSVQIIPCQY        | <b>V</b> SVQIISCQY           | 202                     | 148                  | 0.8                     | 0.65                 | A*30:02 |
|            |                                | SVQIIPCQY         | <b>S</b> VQIISCQY            | 605                     | 300                  | 1.35                    | 0.95                 | A*30:02 |
|            |                                | VSVQIIPCQYL       | <b>V</b> SVQIISCQYL          | 17                      | 17                   | 1                       | 1                    | C*03:03 |
|            |                                | SVQIIPCQY         | <b>S</b> VQIISCQY            | 5190                    | 5168                 | 1.6                     | 1.6                  | A*01:01 |
| NCI-3784   | FLNA <sub>R2049C</sub>         | RVRVSGQGL         | <b>C</b> VRVSGQGL            | 17                      | 553                  | 0.5                     | 2                    | B*07:02 |
|            |                                | QSEIGDASRV        | QSEIGDAS <b>C</b> V          | 15084                   | 14548                | 5.85                    | 4.7                  | A*01:01 |
|            | KIB16B <sub>L1009P</sub>       | ALARLERRHSA       | <b>A</b> PARLERRHSA          | 6270                    | 33                   | 19.9                    | 1                    | B*07:02 |
|            |                                | ALARLERRHS        | <b>A</b> PARLERRHS           | 25367                   | 1572                 | 32                      | 1.5                  | B*07:02 |
|            | SON <sub>R1927C</sub> *        | RARSRTPSR         | RARSRT <b>P</b> SC           | 5568                    | 178                  | 2.4                     | 1.2                  | B*07:02 |
|            |                                | TPSRRSRSH         | TPS <b>C</b> RSRSH           | 503                     | 1188                 | 1.2                     | 1.5                  | B*07:02 |
| TPSRRSR    |                                | TPS <b>C</b> RSRS | 10901                        | 4212                    | 3.05                 | 1.8                     | B*07:02              |         |
| NCI-3903   | KIF1BP <sub>P246S</sub>        | EHNAYHPIEWAI      | <b>H</b> SNAYHSIEWAI         | 333                     | 347                  | 0.3                     | 0.3                  | B*38:01 |
|            |                                | HNAYHPIEWAI       | <b>H</b> NAYHSIEWAI          | 12630                   | 12554                | 5.4                     | 5.4                  | B*38:01 |
|            |                                | NAYHPIEWAI        | <b>N</b> AYHSIEWAI           | 16                      | 21                   | 0.5                     | 0.6                  | C*12:03 |
|            |                                | AYHPIEWAI         | <b>A</b> YHSIEWAI            | 158                     | 115                  | 0.6                     | 0.6                  | A*24:02 |
|            |                                | YHPIEWAI          | <b>Y</b> HSIEWAI             | 2742                    | 308                  | 1.1                     | 0.3                  | B*38:01 |
|            |                                | HPIEWAI           | <b>H</b> SIIEWAI             | n.d.                    | n.d.                 | n.d.                    | n.d.                 | n.d.    |

Predictions determined by IEDB<sup>1</sup>, interrogating 8-11-mer peptides. Candidate minimal mutated epitopes were synthesized based on <500 nM affinity or top 2 percentile (%-tile) rank. Binding affinity and percentile rank for each peptide and HLA allele specified is shown.

The mutated amino acid is bolded in red. Peptides highlighted in grey or yellow were recognized. The most immunogenic minimal neo-epitopes, which showed a greater reactivity either by IFN- $\gamma$  ELISPOT or percentage 4-1BB upregulation compared to the rest of the peptides tested, are highlighted in yellow. \*The SON mutation-specific lymphocytes did not recognize any of the candidate minimal epitopes tested thus far
