# Supplementary material
Source: PubMed Central journal article supplement (PMC7446107)
Supplement: NIHMS1613069-supplement-SUPP_TABLE_4.pdf [file NIHMS1613069-supplement-SUPP_TABLE_4.pdf]

**Supplementary Table 4. Amino acid sequence of the functional mutation-reactive T cell receptors isolated from the peripheral blood CD8<sup>+</sup>PD-1<sup>+</sup> subset of NCI-3998**

| Patient ID | Reactivity                                          | TRA rank/<br>TRB rank<br>(T cell<br>population<br>of origin) | TRAV /TRAJ                    | TCR alpha chain<br>V-J amino acid sequence<br>(CDR3 highlighted)                                                                                             | TRBV/TRBJ                 | TCR beta chain<br>V-D-J amino acid sequence<br>(CDR3 highlighted)                                                                                         |
|------------|-----------------------------------------------------|--------------------------------------------------------------|-------------------------------|--------------------------------------------------------------------------------------------------------------------------------------------------------------|---------------------------|-----------------------------------------------------------------------------------------------------------------------------------------------------------|
| NCI-3998   | MAGEA6 <sub>E168K</sub><br>-specific TCR            | A1/B1<br>(TMG1-<br>enriched)                                 | TRAV21*01/<br>TRAJ21*01F      | METLLGILLILWLQLQWVSSK<br>QEVTPQIPAALSVPEGENLVLN<br>CSFTDSAIYNLQWFRQDPGK<br>GLTSLLIQSSQREQTSGLRNA<br>SLDKSSGRSTLYIAASQPGDSA<br>TYLCAVDNFKFYFGSGTKLN<br>VKP    | TRBV7-3*01/<br>TRBJ1-2*01 | MGTRLLCWAALCLLGADHTGAGVS<br>QTPSNKVTEKGYVELRCDPISGH<br>LYWYRQSLGQGPFLIYFQGTGAAD<br>DSGLPNDRFFAVRPEGSVSTLKIQRTE<br>RGDSAVYLCASSSQGGYGYTFGSGTR<br>LTVV      |
|            | MAGEA6 <sub>E168K</sub><br>-specific TCR            | A2/B2<br>(TMG1-<br>enriched)                                 | TRAV39*01/<br>TRAJ58*01       | MKKLLAMILWLQLDRLSGELK<br>VEQNPLFLSMQEGKNYTIYCN<br>YSTTSDRLYWYRQDPGKSL<br>LFVLLSNGAVKQEGRLMASLD<br>TKARLSTLHITAAVHDLSATYF<br>CAGSGSRLTFEGEGTQLTVNP            | TRBV7-6*01/<br>TRBJ1-2*01 | MGTSLLCWVVLGFLGTDHTGAGVS<br>QSPRYKVTKRGQDVALRCDPISGHVS<br>LYWYRQALGQGPFLTYFNIEAQQD<br>KSGLPNDRFSAERPEGSISTLTIQRTE<br>QRDSAMYRCASSFDRGYGYTFGSGT<br>RLTVV   |
|            | PDS5A <sub>Y1000F;H1</sub><br>007Y<br>-specific TCR | A1/B2<br>(TMG3-<br>enriched)                                 | TRAV38-<br>1*01/<br>TRAJ53*01 | MTRVSLWVAVVSTCLES<br>AQTVTQSQPEMSVQEAETVT<br>LSCYDTSENNYLFWYKQPP<br>SRQMILVIRQEAYKQKNATE<br>NRFVSNFQKAAKSFLKISDS<br>QLGDTAMYFCAFTELNSGGG<br>NYKLTFGKGTLLTVNP | TRBV27*01/<br>TRBJ2-2*01  | MGPQLLGYVVLCLLGAGPLEAQVTQ<br>NPRYLITVTGKKLTVTCSQNMNHEY<br>MSWYRQDPGLRQIYYSMNVEVT<br>DKGDVPEGYKVSKEKRNFLILESPS<br>PNQTSLYFCASSLGGLLRTGELFFGE<br>GSRLTVL    |
|            | MED13 <sub>P1691S</sub><br>-specific TCR            | A1/B1<br>(TMG5-<br>enriched)                                 | TRAV12-<br>1*01/<br>TRAJ27*01 | MISLRVLLVILWLQLSWVWS<br>QRKEVEQDPGPFNVPEGATV<br>AFNCTYSNSASQSFFWYRQD<br>CRKEPKLLMSVYSSGNEGDRF<br>TAQLNRSQYISLLIRDSKLS<br>SATYLCVVNTNAGKSTFGDGT<br>TLTVKP     | TRBV9*01/<br>TRBJ2-1*01   | MGFRLLCCVAFCLLGAGPVDGVTQ<br>TPKHLITATGQQRVTLRCSRSGDLSVY<br>WYQQSLDQGLQFLIQYYNGEERAKG<br>NILERFSAQQFPDLHSELNLSLELGD<br>SALYFCASSGRVTGGFYNEQFFGPGT<br>RLTVL |
|            | MED13 <sub>P1691S</sub><br>-specific TCR            | A2/B2<br>(TMG5-<br>enriched)                                 | TRAV12-<br>2*01/<br>TRAJ29*01 | MKSLRVLLVILWLQLSWVWS<br>QQKEVEQNSGPLSVPEGAIAS<br>LNCTYSDRGSQSFFWYRQYS<br>GKSPPELIMFIYSNGDKEDGRF<br>TAQLNKASQYVLLIRDSQPS<br>DSATYLCASSGGNTPLVFGKG<br>TRLSVIA  | TRBV27*01/<br>TRBJ2-7*01  | MGPQLLGYVVLCLLGAGPLEAQVTQ<br>NPRYLITVTGKKLTVTCSQNMNHEY<br>MSWYRQDPGLRQIYYSMNVEVT<br>DKGDVPEGYKVSKEKRNFLILESPS<br>PNQTSLYFCASSFGGAYEQYFGPGTR<br>LTVT       |

The amino acid sequences of the TRAV-TRAJ or the TRBV-TRBD-TRBJ rearrangements, encoding for the hypervariable region of the TRA and TRB genes, used to construct each TCR are shown. The amino acid sequence of the complementarity determining region 3 (CDR3) important for peptide recognition is highlighted in grey.
