# Supplementary material
Source: PubMed Central journal article supplement (PMC7446107)
Supplement: NIHMS1613069-supplement-SUPP_TABLE_5.pdf [file NIHMS1613069-supplement-SUPP_TABLE_5.pdf]

**Supplementary Table 5. Relative frequency of T cell reactivities in the circulating or tumor-infiltrating T cell subsets targeting mutated neoantigens, self-antigens, and the autologous tumor cell lines**

|            |                                       | Peripheral blood                   |                                           |                                     |                                           | Tumor                              |                                           |
|------------|---------------------------------------|------------------------------------|-------------------------------------------|-------------------------------------|-------------------------------------------|------------------------------------|-------------------------------------------|
|            |                                       | CD8 <sup>+</sup> PD-1 <sup>+</sup> |                                           | CD8 <sup>+</sup> PD-1 <sup>hi</sup> |                                           | CD8 <sup>+</sup> PD-1 <sup>+</sup> |                                           |
| Patient ID |                                       | Percentage 4-1BB <sup>+</sup>      | Percentage of total reactivities detected | Percentage 4-1BB <sup>+</sup>       | Percentage of total reactivities detected | Percentage 4-1BB <sup>+</sup>      | Percentage of total reactivities detected |
| NCI-3998   | MAGEA6 <sub>E168K</sub> (TMG1)        | 2.4                                | 10.0                                      | 2.9                                 | 8.8                                       | 3.8                                | 30.1                                      |
|            | PDS5A <sub>V1000F;H1007Y</sub> (TMG3) | 0.6                                | 2.5                                       | 0.5                                 | 1.5                                       | 0.2                                | 1.6                                       |
|            | MED13 <sub>P1691S</sub> (TMG5)        | 0.3                                | 1.3                                       | N.D.                                | N.D.                                      | 0.9                                | 7.4                                       |
|            | <b>Mutated antigens</b>               | <b>3.3</b>                         | <b>13.8</b>                               | <b>3.4</b>                          | <b>10.3</b>                               | <b>4.9</b>                         | <b>40.2</b>                               |
|            | NY-ESO-1                              | 20.7                               | 86.2                                      | 29.7                                | 89.7                                      | 7.3                                | 59.8                                      |
|            | <b>Self-antigens</b>                  | <b>20.7</b>                        | <b>86.2</b>                               | <b>29.7</b>                         | <b>89.7</b>                               | <b>7.3</b>                         | <b>59.8</b>                               |
|            | <b>3998mel</b>                        | 9.5                                |                                           | 7.2                                 |                                           |                                    | 11.2                                      |
| NCI-3784   | FLNA <sub>R2049C</sub> (TMG3)         | 0.4                                | 16.0                                      | 1.4                                 | 26.4                                      | 0.4                                | 16.0                                      |
|            | KIB16B <sub>L1009P</sub> (TMG5)       | 0.4                                | 16.0                                      | 0.4                                 | 7.5                                       | 0.6                                | 24.0                                      |
|            | SON <sub>R1927C</sub> (TMG8)          | 1                                  | 40.0                                      | 0.6                                 | 11.3                                      | 0.6                                | 24.0                                      |
|            | <b>Mutated antigens</b>               | <b>1.8</b>                         | <b>72.0</b>                               | <b>2.4</b>                          | <b>45.3</b>                               | <b>1.6</b>                         | <b>64.0</b>                               |
|            | MAGEA3                                | N.D.                               | <b>N.D.</b>                               | 0.8                                 | 15.1                                      | N.D.                               | N.D.                                      |
|            | GP100                                 | 0.7                                | 28.0                                      | 2.1                                 | 39.6                                      | 0.9                                | 36.0                                      |
|            | <b>Self-antigens</b>                  | <b>0.7</b>                         | <b>28.0</b>                               | <b>2.9</b>                          | <b>54.7</b>                               | <b>0.9</b>                         | <b>36.0</b>                               |
|            | <b>3784mel</b>                        | *24.6                              |                                           | *44.9                               |                                           |                                    | *45.2                                     |
| NCI-3903   | KIF1BP <sub>P246S</sub> (TMG9)        | 1.3                                | 39.4                                      |                                     |                                           | 5.8                                | 75.3                                      |
|            | TMG4 (antigen unknown)                | N.D.                               | N.D.                                      |                                     |                                           | 0.3                                | 3.9                                       |
|            | <b>Mutated antigens</b>               | <b>1.3</b>                         | <b>39.4</b>                               |                                     |                                           | <b>6.5</b>                         | <b>79.2</b>                               |
|            | SSX2                                  | 2.0                                | 60.6                                      |                                     |                                           | 1.6                                | 20.8                                      |
|            | <b>Self-antigens</b>                  | <b>2.0</b>                         | <b>66.6</b>                               |                                     |                                           | <b>1.6</b>                         | <b>20.8</b>                               |
|            | <b>3903mel</b>                        | 7.8                                |                                           |                                     |                                           |                                    | 10.2                                      |
| NCI-3926   | <b>Mutated antigens</b>               | <b>0.0</b>                         | <b>0.0</b>                                | <b>0.0</b>                          | <b>0.0</b>                                | <b>0.0</b>                         | <b>0.0</b>                                |
|            | NY-ESO-1                              | 1.7                                | 100.0                                     | 1.4                                 | 100.0                                     | 3.4                                | 70.8                                      |
|            | MART1                                 | N.D.                               |                                           | N.D.                                |                                           | 0.5                                | 10.4                                      |
|            | GP100                                 | N.D.                               |                                           | N.D.                                |                                           | 0.9                                | 18.8                                      |
|            | <b>Self-antigens</b>                  | <b>1.7</b>                         | <b>100.0</b>                              | <b>1.4</b>                          | <b>100.0</b>                              | <b>4.8</b>                         | <b>100.0</b>                              |
|            | <b>3926mel</b>                        | *6.3                               |                                           | *7.7                                |                                           |                                    | *13.3                                     |

The absolute and relative frequency of circulating or tumor-infiltrating CD8<sup>+</sup>PD-1<sup>+</sup> T cells targeting mutations, self-antigens, and the corresponding autologous tumor cell lines (3998mel, 3784mel, 3903mel, or 3926mel) is shown. Recognition of mutated antigens (TMGs), self-antigens (NY-ESO-1, MAGEA3, SSX2, MART1, GP100, and TYR), and the autologous tumor cell line for each of the patients was evaluated simultaneously in one experiment. IFN-γ ELISPOT and 4-1BB up-regulation were analyzed at 20 h. Only the frequencies from the conditions that demonstrated >40 spots and >twice the background by IFN-γ ELISPOT are shown. For subjects NCI-3998 and 3903 the frequency of T cells recognizing a given antigen was based on the percentage 4-1BB up-regulation at 20 h after coculture. Data are gated on CD3<sup>+</sup> cells. The frequency of 4-1BB expression against the irrelevant control was subtracted. For subjects NCI-3784 and 3926 the frequency of the reactivities was calculated based on IFN-γ ELISPOT data, as the frequencies were low and sometimes undetectable over background using 4-1BB upregulation. N.D. = Not detected. \*The frequency of tumor-reactive cells for subjects NCI-3784 and NCI-3926 using IFN-γ ELISPOT was off-scale. For these, the frequency of autologous tumor-reactive cells was based on the percentage of 4-1BB up-regulation. Data are representative of at least two independent experiments
