# Supplementary material
Source: PubMed Central journal article supplement (PMC7446107)
Supplement: NIHMS1613069-supplement-SUPP_TABLE_6.pdf [file NIHMS1613069-supplement-SUPP_TABLE_6.pdf]

**Supplementary Table 6. Summary of TRB overlap between circulating and tumor-resident CD8<sup>+</sup> lymphocyte subsets**

|             |      | PBMC      |           |           |       |           |           |       |           |           |            |       |           |           |            |       |           |           |       |           |           |      |           |           |       |       |       |
|-------------|------|-----------|-----------|-----------|-------|-----------|-----------|-------|-----------|-----------|------------|-------|-----------|-----------|------------|-------|-----------|-----------|-------|-----------|-----------|------|-----------|-----------|-------|-------|-------|
|             |      | 3903      |           |           | 3926  |           |           | 3998  |           |           |            | 3992  |           |           |            | 3713  |           |           | 3759  |           |           | 3784 |           |           |       |       |       |
|             |      | CD8+      | CD8+PD-1- | CD8+PD-1+ | CD8+  | CD8+PD-1- | CD8+PD-1+ | CD8+  | CD8+PD-1- | CD8+PD-1+ | CD8+PD-1hi | CD8+  | CD8+PD-1- | CD8+PD-1+ | CD8+PD-1hi | CD8+  | CD8+PD-1- | CD8+PD-1+ | CD8+  | CD8+PD-1- | CD8+PD-1+ | CD8+ | CD8+PD-1- | CD8+PD-1+ |       |       |       |
| Fresh Tumor | 3903 | CD8+      | 0.227     | 0.262     | 0.597 |           |           |       |           |           |            |       |           |           |            |       |           |           |       |           |           |      |           |           |       |       |       |
|             |      | CD8+PD-1- | 0.396     | 0.382     | 0.203 |           |           |       |           |           |            |       |           |           |            |       |           |           |       |           |           |      |           |           |       |       |       |
|             |      | CD8+PD-1+ | 0.097     | 0.133     | 0.630 |           |           |       |           |           |            |       |           |           |            |       |           |           |       |           |           |      |           |           |       |       |       |
|             | 3926 | CD8+      |           |           |       | 0.134     | 0.119     | 0.190 |           |           |            |       |           |           |            |       |           |           |       |           |           |      |           |           |       |       |       |
|             |      | CD8+PD-1- |           |           |       | 0.134     | 0.118     | 0.099 |           |           |            |       |           |           |            |       |           |           |       |           |           |      |           |           |       |       |       |
|             |      | CD8+PD-1+ |           |           |       | 0.094     | 0.072     | 0.316 |           |           |            |       |           |           |            |       |           |           |       |           |           |      |           |           |       |       |       |
|             | 3998 | CD8+      |           |           |       |           |           | 0.123 | 0.081     | 0.445     | 0.307      |       |           |           |            |       |           |           |       |           |           |      |           |           |       |       |       |
|             |      | CD8+PD-1- |           |           |       |           |           | 0.114 | 0.101     | 0.140     | 0.045      |       |           |           |            |       |           |           |       |           |           |      |           |           |       |       |       |
|             |      | CD8+PD-1+ |           |           |       |           |           | 0.098 | 0.060     | 0.484     | 0.363      |       |           |           |            |       |           |           |       |           |           |      |           |           |       |       |       |
|             | 3992 | CD8+      |           |           |       |           |           |       |           |           |            | 0.420 | 0.261     | 0.525     | 0.371      |       |           |           |       |           |           |      |           |           |       |       |       |
|             |      | CD8+PD-1- |           |           |       |           |           |       |           |           |            | 0.449 | 0.307     | 0.468     | 0.245      |       |           |           |       |           |           |      |           |           |       |       |       |
|             |      | CD8+PD-1+ |           |           |       |           |           |       |           |           |            | 0.211 | 0.035     | 0.576     | 0.710      |       |           |           |       |           |           |      |           |           |       |       |       |
|             | 3713 | CD8+      |           |           |       |           |           |       |           |           |            |       |           |           |            | 0.414 | 0.352     | 0.388     |       |           |           |      |           |           |       |       |       |
|             |      | CD8+PD-1- |           |           |       |           |           |       |           |           |            |       |           |           |            | 0.465 | 0.438     | 0.271     |       |           |           |      |           |           |       |       |       |
|             |      | CD8+PD-1+ |           |           |       |           |           |       |           |           |            |       |           |           |            | 0.067 | 0.041     | 0.290     |       |           |           |      |           |           |       |       |       |
|             | 3759 | CD8+      |           |           |       |           |           |       |           |           |            |       |           |           |            |       |           |           | 0.157 | 0.104     | 0.467     |      |           |           |       |       |       |
|             |      | CD8+PD-1- |           |           |       |           |           |       |           |           |            |       |           |           |            |       |           |           | 0.264 | 0.256     | 0.134     |      |           |           |       |       |       |
|             |      | CD8+PD-1+ |           |           |       |           |           |       |           |           |            |       |           |           |            |       |           |           | 0.055 | 0.010     | 0.482     |      |           |           |       |       |       |
|             | 3784 | CD8+      |           |           |       |           |           |       |           |           |            |       |           |           |            |       |           |           |       |           |           |      |           |           | 0.215 | 0.200 | 0.228 |
|             |      | CD8+PD-1- |           |           |       |           |           |       |           |           |            |       |           |           |            |       |           |           |       |           |           |      |           |           | 0.209 | 0.206 | 0.081 |
|             |      | CD8+PD-1+ |           |           |       |           |           |       |           |           |            |       |           |           |            |       |           |           |       |           |           |      |           |           | 0.096 | 0.083 | 0.256 |

Analysis of TRB overlap of nucleotide sequences encoding for the variable V-D-J region of the TRB gene was performed using immunoSEQ (Adaptive Biotechnologies) using the following formula (Sample TCRB overlap between population A and B = [shared sequence reads in A + shared sequence reads in B]/Σsequence reads in A + B). A TRB overlap of 1 represents 100% overlap between two populations. The cells were color coded based on lower (yellow) to greater (blue) TRB overlap
