# Supplementary material
Source: PubMed Central journal article supplement (PMC7446107)
Supplement: NIHMS1613069-supplement-SUPP_TABLE_7.pdf [file NIHMS1613069-supplement-SUPP_TABLE_7.pdf]

**Supplementary Table 7. Relative frequency of the specificities detected in the TIL infusion product of subjects NCI-3998, 3784, 3903, 3926**

| Patient ID | Clinical outcome in response to TIL therapy | Specificities detected in the infusion bag                                                                   |
|------------|---------------------------------------------|--------------------------------------------------------------------------------------------------------------|
| NCI-3998   | NR                                          | TMG1 (MAGEA6 <sub>E&gt;K</sub> ), TMG5 (MED13 <sub>P&gt;S</sub> ), NY-ESO-1                                  |
| NCI-3784   | CR                                          | TMG3 (FLNA <sub>R&gt;C</sub> ), TMG4, TMG5 (KIF16B <sub>L&gt;P</sub> ), TMG8 (SON <sub>R&gt;C</sub> ), GP100 |
| NCI-3903   | CR                                          | TMG8, TMG9 (KIF1BP <sub>P&gt;S</sub> ), SSX2                                                                 |
| NCI-3926   | NR                                          | MART1, GP100, TYR, NY-ESO-1                                                                                  |

Clinical outcome of the patients following treatment with non-myeloablative preparative regimen, TIL, and high-dose IL-2 was evaluated using RECIST criteria. CR = complete responder; NR = non-responder. The TIL infusion bag was co-incubated with autologous DCs transfected with the autologous TMG RNA encoding for mutated neoantigens identified by exome sequencing, or with RNA encoding for self-antigens MART1, GP100, TYR, NY-ESO-1, MAGEA3, and SSX2. IFN- $\gamma$  ELISPOT at 20 h was used to evaluate reactivity. Reactivities >40 spots and >than twice the background are shown. The specific antigen recognized encoded by the TMG is shown in parenthesis. TIL infusion products were generated as previously described<sup>2</sup>
