# Supplementary material
Source: PubMed Central journal article supplement (PMC7446107)
Supplement: NIHMS1613069-supplement-SUPP_TABLE_8.pdf [file NIHMS1613069-supplement-SUPP_TABLE_8.pdf]

**Supplementary Table 8. Subjects included in the phenotypic characterization of TIL and circulating lymphocytes**

| <b>Variable/trait</b>  | <b>Total (%)</b> |
|------------------------|------------------|
| Total no. patients     | 18               |
| <b>Sex</b>             |                  |
| Male                   | 14 (78)          |
| Female                 | 4 (22)           |
| <b>Age</b>             |                  |
| 31-40                  | 4 (22)           |
| 41-50                  | 3 (17)           |
| 51-60                  | 9 (50)           |
| 61-70                  | 2 (11)           |
| <b>Prior Treatment</b> |                  |
| Surgery                | 17 (94)          |
| Chemotherapy           | 2 (11)           |
| Radiotherapy           | 2 (11)           |
| Immunotherapy          | 12 (67)          |
| Any 2 or more          | 13 (72)          |
| Any 3 or more          | 8 (44)           |
| No treatment           | 1 (5)            |
