# Supplementary material
Source: PubMed Central journal article supplement (PMC7446107)
Supplement: NIHMS1613069-supplement-SUPP_TABLE_9.pdf [file NIHMS1613069-supplement-SUPP_TABLE_9.pdf]

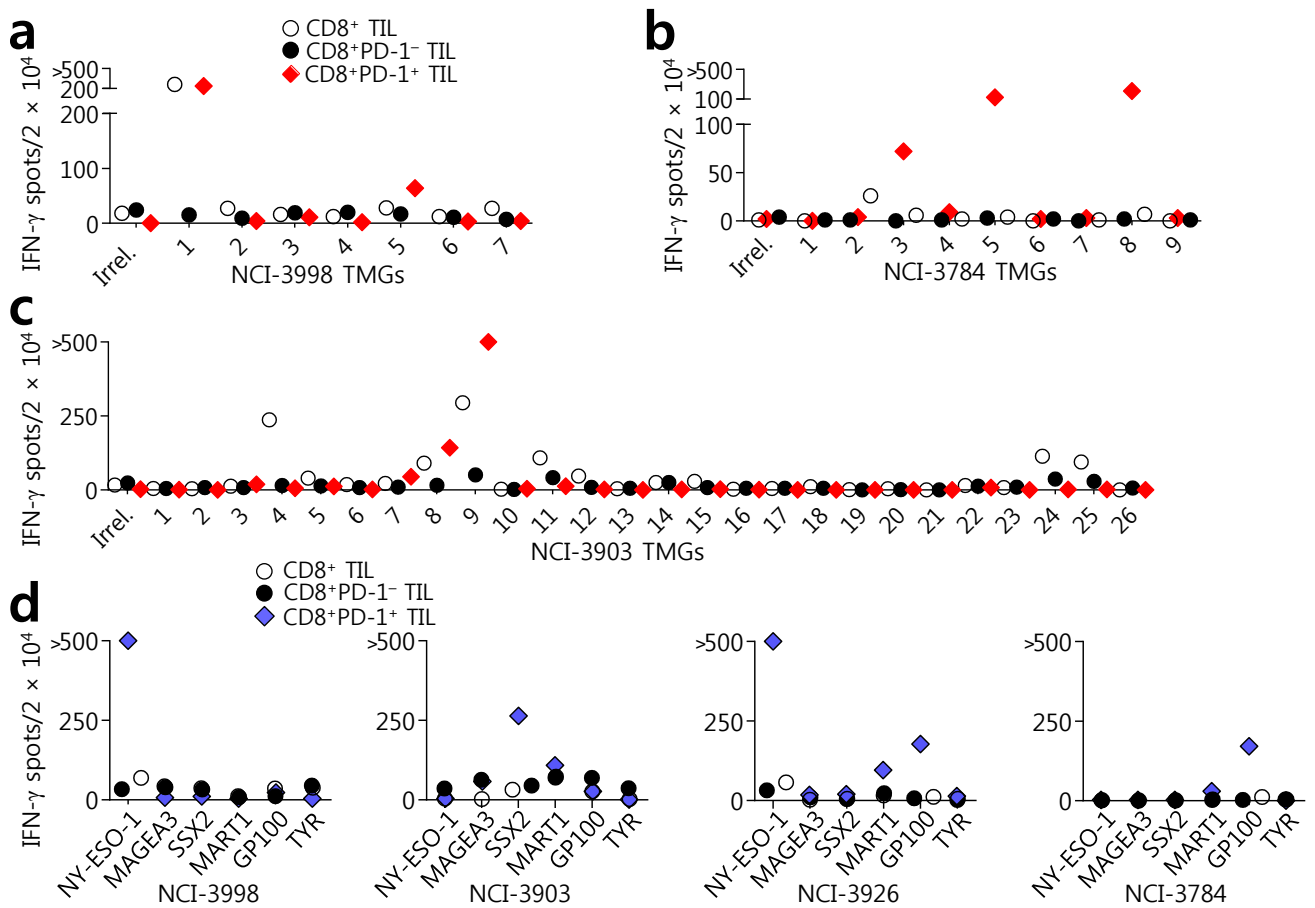

**Supplementary Figure 4** Immunological screening of tumor-derived lymphocytes for recognition of mutated neoantigens and shared tumor antigens. **(a–d)** NCI-3998, 3784 and 3903 CD8<sup>+</sup> lymphocytes were separated from fresh tumor single cell suspensions based on PD-1 expression, and expanded *in vitro*. Tumor-infiltrating lymphocyte (TIL) subsets from NCI-3998 **(a)**, NCI-3784 **(b)**, and NCI-3903 **(c)** were cocultured with autologous dendritic cells (DCs) transfected with an irrelevant TMG (Irrel.) or the indicated TMG constructs. IFN- $\gamma$  spots/ $2 \times 10^4$  cells is shown. **(d)** TIL subsets from subjects (indicated below each graph) were cocultured with autologous DCs transfected with full-length RNA encoding for NY-ESO-1, MAGEA3, MART1, GP100, and TYR. IFN- $\gamma$  spots/ $2 \times 10^4$  cells at 20 h is shown. “>” denotes greater than 500 spots /  $2 \times 10^4$  cells. Data are representative of at least two independent experiments.

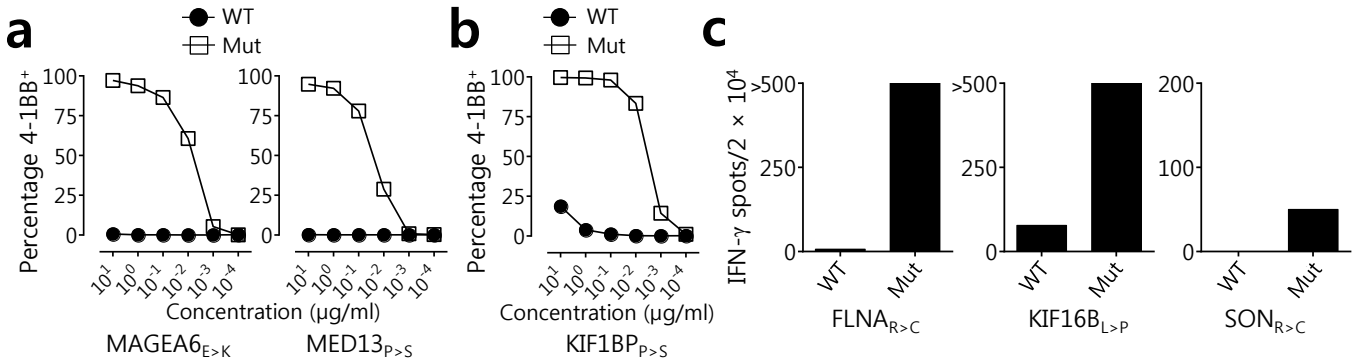

**Supplementary Figure 5** Recognition of neoantigens by enriched populations of TMG-reactive cells isolated from the tumor-derived CD8<sup>+</sup>PD-1<sup>+</sup> subsets from subjects NCI-3998, 3903, and 3784. **(a)** NCI-3998 TMG1- (left) and TMG5-reactive TIL (right) were cocultured with DCs pulsed with WT and Mut MAGEA6<sub>E>K</sub> or MED13P>S minimal epitopes. TMG9-reactive TIL isolated from the tumor of NCI-3903 were cocultured with DCs pulsed with WT or Mut KIF1BP<sub>P>S</sub> minimal epitopes **(b)**, and NCI-3784 TMG3- (left), TMG5- (middle) and TMG8-reactive TIL (right) were cocultured with autologous DCs pulsed with the WT or Mut 25-mers indicated **(c)**. Percentage of 4-1BB expression or IFN-γ spots/2 × 10<sup>4</sup> cells at 20 h is shown. ">" denotes greater than 500 spots per 2 × 10<sup>4</sup> cells. All data are representative of at least two independent experiments.

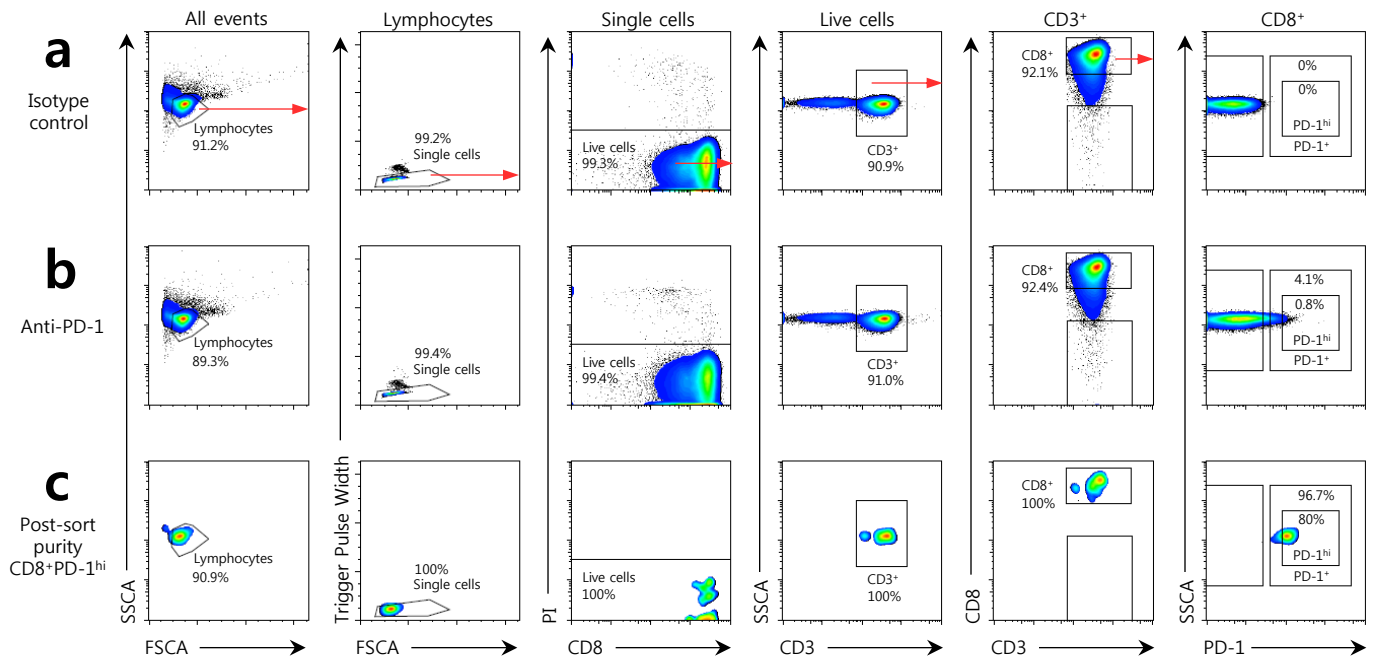

**Supplementary Figure 6** Example of the gating strategy used for sorting circulating CD8<sup>+</sup> lymphocytes based on PD-1 expression. Flow cytometry analysis of one representative melanoma patient is shown. CD8<sup>+</sup> cells were positively selected from a pre-treatment leukapheresis product using CD8 microbeads, and then stained with fluorochrome-labeled anti-CD3, CD8, and either isotype control (IgG4-AF647) or anti-PD-1 (AMP-514 AF647) antibody. Dot plots of the CD8-enriched cells stained with isotype control (**a**), and anti-PD-1 (**b**) are displayed. The hierarchy of the gating strategy is depicted from left to right. The gate used to sort for CD8<sup>+</sup>PD-1<sup>+</sup> cells was set based on the isotype control. (**c**) The post-sort purity for the CD8<sup>+</sup>PD-1<sup>hi</sup> sorted cells is shown.

**Supplementary Table 1. Patient characteristics**

| Patient ID | Cancer type      | Prior therapy                      | Months from end of last therapy to leukapheresis (mo) | %PD-1 <sup>+</sup> (of CD8 <sup>+</sup> ) PBMC | # putative mutations <sup>d</sup> | Mutations evaluated <sup>e</sup> |
|------------|------------------|------------------------------------|-------------------------------------------------------|------------------------------------------------|-----------------------------------|----------------------------------|
| NCI-3713   | Mel <sup>a</sup> | IL-2, anti-CTLA-4                  | 7 mo                                                  | 4.1%                                           | 4359                              | 7 minimal epitopes               |
| NCI-3998   | Mel              | No treatment                       | -                                                     | 1.9%                                           | 279                               | 115 (TMG#1-7)                    |
| NCI-3784   | Mel              | Surgery, IFN                       | 14 mo                                                 | 2.1%                                           | 440                               | 140 (TMG1-9)                     |
| NCI-3903   | Mel              | Surgery, MART-F5 TCR <sup>b</sup>  | 55 mo                                                 | 3.4%                                           | 414                               | 308 (TMG#1-26)                   |
| NCI-3926   | Mel              | IL-2, surgery, chemo. <sup>c</sup> | 8 mo                                                  | 7.4%                                           | 346                               | 128 (TMG#1-11)                   |
| NCI-3759*  | Mel              | Surgery, IFN                       | 1 mo                                                  | 1.0%                                           | n.d. <sup>f</sup>                 | n.e. <sup>g</sup>                |
| NCI-3992*  | Mel              | Anti-PD-1, anti-CTLA-4             | 5 mo                                                  | 8%                                             | n.d.                              | n.e.                             |

<sup>a</sup>Melanoma; <sup>b</sup> Adoptive transfer of autologous T cells that were gene-engineered to express a MART1 HLA-A\*0201-restricted T cell receptor (TCR). <sup>c</sup>Chemotherapy NCI- 3926: dacarbazine and vinblastine. <sup>d</sup>Putative non-synonymous mutations were defined by: >2 exome variant reads, ≥ 10% variant frequency in the exome, ≥10 normal reads, and tumor/normal variant frequency ≥5. Common single nucleotide polymorphisms were filtered. <sup>e</sup>Mutations screened were selected based on whole-exome and transcriptome analysis. <sup>f</sup>Not determined. <sup>g</sup>Not evaluated. \*NCI-3759 and 3992 were only included in Fig.4i

**Supplementary Table 2. Mutated tandem minigenes (TMGs) screened for subjects NCI-3998, 3784, 3903, and 3926**

| Patient ID | TMG# | Mutation type | Gene                 | Transcript ID         | WT AA | Mut AA | AA position | Wild-type 25-mer               | Mutated 25-mer                 |
|------------|------|---------------|----------------------|-----------------------|-------|--------|-------------|--------------------------------|--------------------------------|
| NCI-3998   | TMG1 | SNV           | AMER1                | uc022byb.1            | P     | L      | 686         | SQISHRGITSAPPTASS<br>EPDWRDF   | SQISHRGITS AFLTTASSE<br>PDWRDF |
|            |      | SNV           | LOC100133957         | uc011mlt.1            | A     | V      | 141         | RACEQGPSGNKPANG<br>GLQKRRLEPM  | RACEQGPSGNKPVNGG<br>LQKRRLEPM  |
|            |      | SNV           | CXorf22              | uc004ddj.3            | M     | I      | 865         | SNELVLRPRGFFMKTCTF<br>RGTVRLYN | SNELVLRPRGFFIKTCFR<br>GTVRLYN  |
|            |      | SNV           | MAGEA6               | uc022chf.1            | E     | K      | 168         | DSLQLVFGIELMEVDPI<br>GHVYIFAT  | DSLQLVFGIELMKVDPI<br>GHVYIFAT  |
|            |      | SNV           | GPR112               | uc010nsb.1            | P     | S      | 2870        | EISFPNDDFDKDPYCSS<br>P         | EISFPNDDFDKDSYCSSP             |
|            |      | SNV           | RBMXL3               | uc011mte.1            | D     | N      | 577         | GGCSADAYSGGHSSS<br>QSNRYGGGG   | GGCSADAYSGGHSSS<br>QSNRYGGGG   |
|            |      | SNV           | CHRD1                | uc011mss.2            | R     | Q      | 226         | TKQECKKIHCNRYPCCK<br>YPQKIDGK  | TKQECKKIHCNQYPCCK<br>YPQKIDGK  |
|            |      | SNV           | CDKN2B               | uc022beo.1            | E     | K      | 3           | MREENKGMPSGGGSD<br>EGLASAAARG  | MRKENKGMPSGGGSD                |
|            |      | SNV           | CDKN2B               | uc022beo.1            | G     | R      | 17          | NKGMPSGGGSDEGLAS<br>AAARGLVEK  | NKGMPSGGGSDERLAS<br>AAARGLVEK  |
|            |      | SNV           | UBAC1                | uc004cgt.3            | E     | K      | 276         | SATDEEARDELTEIFKKI<br>RRKREFR  | SATDEEARDELTKIFKKI<br>RRKREFR  |
|            |      | SNV           | GOLGA2               | uc011maw.2            | A     | V      | 785         | ASAQKEPEAAPAPGT<br>GGDSVCGET   | ASAQKEPEAAPVPGT<br>GGDSVCGET   |
|            |      | SNV           | PAPPA                | uc004bjn.3            | R     | Q      | 151         | GLYDKCSYISRDRGWV<br>VGIHTISDQ  | GLYDKCSYISRDQGWV<br>VGIHTISDQ  |
|            |      | SNV           | OR13C5               | uc011lvp.2            | H     | Y      | 176         | VQLPFCRNIIINHFTCEI<br>LAVMKLA  | VQLPFCRNIIINYFTCEIL<br>AVMKLA  |
|            |      | SNV           | PSD3                 | uc003wza.3            | H     | Y      | 796         | AVYKSGFLARKIHADM<br>DGKKTPRGK  | AVYKSGFLARKIYADMD<br>GKKTPRGK  |
|            |      | SNV           | CSMD3                | uc011lhx.2            | E     | K      | 1460        | FQCDPGYELQGEERITCI<br>QVENRYF  | FQCDPGYELQGEKRITCI<br>QVENRYF  |
|            |      | SNV           | PVRIG                | uc003uuf.1            | I     | V      | 114         | PARQARWETQSSISLILE<br>GSGASSP  | PARQARWETQSSVSLIL<br>EGSGASSP  |
| NCI-3998   | TMG2 | SNV           | CYP3A43              | uc003urz.1            | E     | K      | 144         | LLSPAFTSVKFKEMVPII<br>SQCGDML  | LLSPAFTSVKFKKMVPIIS<br>QCGDML  |
|            |      | SNV           | ENSG000000021<br>461 | ENST000000043<br>3277 | E     | K      | 93          | LLSPAFTSVKFKEVK<br>R           | LLSPAFTSVKFKKVRK               |
|            |      | SNV           | SAMD9L               | uc022ahh.1            | R     | Q      | 1188        | ETENWSPQKSQRRYD<br>MYNTACFLGE  | ETENWSPQKSQRQYD<br>MYNTACFLGE  |

|          |      |     |                    |            |   |   |      |                                      |                                      |
|----------|------|-----|--------------------|------------|---|---|------|--------------------------------------|--------------------------------------|
|          |      | SNV | NPC1L1             | uc011kbw.2 | P | L | 459  | LQERLRHLQVWSPEAQ<br>RNISLQDIC        | LQERLRHLQVWSLEAQ<br>RNISLQDIC        |
|          |      | SNV | FAM20C             | uc003sip.3 | P | L | 224  | FLSPGEEAAVDSYPNWL<br>KFHIGINRY       | FLSPGEEAAVDSYLNWLK<br>FHIGINRY       |
|          |      | SNV | TCRBV22S1A2<br>N1T | uc022amx.2 | E | K | 39   | QKVEFLVSFYNNKISEKS<br>EIFDDQF        | QKVEFLVSFYNNKISEKS<br>EIFDDQF        |
|          |      | SNV | BRAF               | uc003vvc.4 | V | E | 600  | LTVKIGDFGLATVKSRW<br>SGSHQFEQ        | LTVKIGDFGLATEKSRW<br>SGSHQFEQ        |
|          |      | SNV | PRRT4              | uc022aky.1 | P | S | 706  | CRGFEGAAAANPAPSPA<br>SSPCSDYTV       | CRGFEGAAAANPASSPAS<br>SPCSDYTV       |
|          |      | SNV | POP7               | uc022ais.1 | V | A | 108  | LQVAANTSTVELVDELE<br>PETDTREP        | LQVAANTSTVELADELE<br>PETDTREP        |
|          |      | SNV | PRIM2              | uc003pdx.3 | R | W | 79   | TEQYQSKLESELRKLKFS<br>YRENLED        | TEQYQSKLESELWKLKFS<br>SYRENLED       |
|          |      | SNV | TCTE1              | uc003oxi.2 | D | N | 115  | EHQQKVLNHLSPDLPLA<br>VTANLIDS        | EHQQKVLNHLSPNLPLA<br>VTANLIDS        |
|          |      | SNV | SERAC1             | uc031sqr.1 | I | M | 34   | KSGTHWRDIRNIIKFTG<br>SLILGGSL        | KSGTHWRDIRNIMKFT<br>GSLILGGSL        |
|          |      | SNV | AK9                | uc003ptr.4 | P | L | 381  | EEALKPFLNPRPYLLPP<br>MPGPPCK         | EEALKPFLNPRLYLLPP<br>MPGPPCK         |
|          |      | SNV | CDH18              | uc003jgd.3 | M | I | 569  | SRTVQDVVYLPIMISDG<br>GIPSLSSS        | SRTVQDVVYLPPIISDGGI<br>PSLSSS        |
|          |      | SNV | ZFP62              | uc021yjo.1 | L | F | 794  | CECGKSFNYRSVLDQHK<br>RIHTGKKP        | CECGKSFNYRSVFDQHK<br>RIHTGKKP        |
| NCI-3998 | TMG3 | SNV | SH3PXD2B           | uc003mbr.3 | N | S | 278  | KEGWAPASYLKKNSGE<br>PLPPKPGPG        | KEGWAPASYLKKSSGEP<br>LPPKPGPG        |
|          |      | SNV | PPM1K              | uc003hrm.5 | A | V | 181  | KAFSSHARLSADATLLTS<br>GTTATVA        | KAFSSHARLSADVTLLTS<br>GTTATVA        |
|          |      | SNV | PDS5A              | uc003guv.4 | Y | F | 1000 | MATEKLLSLLPEYVVPY<br>MIHLLAHDPDFTRSQ | MATEKLLSLLPEFVVPY<br>MIYLLAHDPDFTRSQ |
|          |      | SNV |                    |            | H | Y | 1007 |                                      |                                      |
|          |      | SNV | FAT1               | uc003izf.3 | S | L | 2713 | PKFSEPFYFTVSEDVPI<br>GTEIDLI         | PKFSEPFYFTVLEDVPI<br>GTEIDLI         |
|          |      | SNV | TENM3              | uc003ive.1 | G | E | 538  | HVLDVQNGILYKNGE<br>NQFISQQPP         | HVLDVQNGILYKENGE<br>NQFISQQPP        |
|          |      | SNV | CNOT10             | uc011axj.2 | S | L | 511  | SIQNTVYNDGQSSAIPV<br>ASMEFAAI        | SIQNTVYNDGQSLAIPV<br>ASMEFAAI        |
|          |      | SNV | DLG1               | uc011bue.2 | S | L | 481  | LSGELRKGDRIIVNSVD<br>LRAASHE         | LSGELRKGDRIILVNSVD<br>LRAASHE        |
|          |      | SNV | ZBTB21             | uc021wjo.1 | L | F | 682  | YICTYCGKAYRFLSQFKQ<br>HIKMHPG        | YICTYCGKAYRFFSQFKQ<br>HIKMHPG        |

|          |      |                 |                     |                     |     |                              |                              |                               |                               |
|----------|------|-----------------|---------------------|---------------------|-----|------------------------------|------------------------------|-------------------------------|-------------------------------|
|          |      | SNV             | TSHZ2               | uc021wex.1          | E   | K                            | 468                          | ELKKESKKERPEETSKDE<br>KVVKSED | ELKKESKKERPEKTSKDE<br>KVVKSED |
|          |      | SNV             | ADNP                | uc002xvu.1          | S   | F                            | 1032                         | QGDREQLKWKNSYK<br>VEGFWSKDQ   | QGDREQLKWKNSFYK<br>VEGFWSKDQ  |
|          |      | SNV             | CST9                | uc002wtl.3          | G   | S                            | 20                           | KAMPWALSLLLMGFQL<br>LVTYAWCSE | KAMPWALSLLMSFQL<br>LVTYAWCSE  |
|          |      | SNV             | PCBP1-AS1           | uc002sga.3          | L   | F                            | 9                            | MVSVDGGFLWTLINQ<br>LLFDSSAEP  | MVSVDGGFFWTLINQ<br>LLFDS      |
|          |      | SNV             | SRBD1               | uc010yoc.2          | P   | L                            | 54                           | RNLRQLLLTSPVPGRTL<br>MGVDPGYK | RNLRQLLLTSPVLGRTL<br>MGVDPGYK |
|          |      | SNV             | CAD                 | uc010eyw.3          | S   | F                            | 1947                         | TSSVQKGESLADSVQT<br>MSCYADVVV | TSSVQKGESLADVFQT<br>MSCYADVVV |
|          |      | SNV             | ENSG00000168<br>918 | ENST0000045<br>5936 | E   | K                            | 375                          | YADLLSHDQLLTERREQ<br>KVFLHFEE | YADLLSHDQLLTKRREQ<br>KVFLHFEE |
| NCI-3998 | TMG4 | SNV             | ZDBF2               | uc031rqy.1          | P   | S                            | 301                          | RMGTGKSLRVKSPSKLA<br>VNPNTDM  | RMGTGKSLRVKSSSKLA<br>VNPNTDM  |
|          |      | SNV             | TTN                 | uc031rqd.1          | D   | N                            | 16446                        | TDIKAESCYLTWDAPLD<br>NGGSEITH | TDIKAESCYLTWNAPLD<br>NGGSEITH |
|          |      | SNV             | ZNF586              | uc010euh.3          | T   | I                            | 186                          | YTSSLIKHRRHTGERPY<br>ECSEGR   | YTSSLIKHRRHIGERPYE<br>CSEGR   |
|          |      | SNV             | NLRP2               | uc021vbq.1          | G   | E                            | 139                          | FKTEAQAFETKGNVIC<br>LGKEVFKG  | FKTEAQAFETKENVICL<br>GKEVFKG  |
|          |      | SNV             | NLRP2               | uc010eso.3          | G   | E                            | 136                          | LERFKTEAQETKGNVIC<br>GKEVFKG  | LERFKTEAQETKENVICL<br>GKEVFKG |
|          |      | SNV             | NLRP2               | uc010esn.3          | G   | E                            | 115                          | RKPLSLAFTETKGNVIC<br>GKEVFKG  | RKPLSLAFTETKENVICL<br>GKEVFKG |
|          |      | SNV             | ENSG00000022<br>556 | ENST0000058<br>8619 | G   | E                            | 139                          | FKTEAQAFETKGN<br>HPTMPLPVH    | FKTEAQAFETKEN<br>HPT          |
|          |      | SNV             | FAM90A27P           | uc031rmv.1          | E   | K                            | 7                            | MQEAWKEPAEDCLFLR<br>HPTMPLPVH | MQEAWKPAEDCLFLR<br>HPT        |
|          |      | SNV             | C19orf73            | uc002pmq.4          | G   | E                            | 10                           | MRLKVGFGGGGCFRK<br>DALCLEGGVS | MRLKVGFGGEGCFRKD<br>ALCLEG    |
|          |      | SNV             | RELB                | uc021uvq.1          | L   | F                            | 153                          | RYECEGRSAGSILGESST<br>EASKTLP | RYECEGRSAGSIFGESST<br>EASKTLP |
|          |      | FS<br>insertion | HNRNPL              | uc021uui.1          |     |                              | 291                          | VKFMKSKPGAAMVEM<br>ADGYAVDRAI | VKFMKSKPGAAMVGD<br>G          |
|          |      | SNV             | RYR1                | uc002oiu.3          | H   | Y                            | 821                          | PCHEAVLPRERLHLEPIK<br>EYRREGP | PCHEAVLPRERLYLEPIK<br>EYRREGP |
|          |      | SNV             | NFIC                | uc010xhj.2          | R   | W                            | 122                          | DQKGMRRIDCLRQAD<br>KVVRLDLVM  | DQKGMRRIDCLWQA<br>DKVVRLDLVM  |
| SNV      | LRP3 | uc010edh.3      | S                   | F                   | 756 | PLGVCRNPPPCSPMLE<br>ASDDEALL | PLGVCRNPPPCPFMLE<br>ASDDEALL |                               |                               |

|          |                     |                     |                     |                     |     |                           |                           |                               |                               |
|----------|---------------------|---------------------|---------------------|---------------------|-----|---------------------------|---------------------------|-------------------------------|-------------------------------|
|          |                     | SNV                 | CSNK1G2             | uc010dsu.3          | P   | S                         | 328                       | LNSTNGELNADDPTAG<br>HSNAPITAP | LNSTNGELNADDSTAG<br>HSNAPITAP |
| NCI-3998 | TMG5                | SNV                 | ARRDC2              | uc002nhv.3          | P   | L                         | 202                       | IDRKGYPGEVIVFAEI<br>DNGSTRP   | IDRKGYPGEVILVFAEI<br>DNGSTRP  |
|          |                     | SNV                 | CTDP1               | uc021ult.1          | G   | R                         | 660                       | PGPEVRIYDSNTGKLIRT<br>GARGPPA | PGPEVRIYDSNTRKLIRT<br>GARGPPA |
|          |                     | SNV                 | SERPINB3            | uc002lji.3          | E   | K                         | 250                       | GKDLSMIVLLPNEIDGL<br>QKLEEKLT | GKDLSMIVLLPNKIDGL<br>QKLEEKLT |
|          |                     | SNV                 | HEXDC               | uc002kew.3          | A   | V                         | 63                        | YEGPLRLLRAKYAYSPSE<br>IKEILHL | YEGPLRLLRAKYVYSPSEI<br>KEILHL |
|          |                     | SNV                 | ENSG00000169<br>660 | ENST0000057<br>8775 | A   | V                         | 24                        | YEGPLRLLRAKYAYRLEC<br>SGAILAH | YEGPLRLLRAKYVYRLEC<br>SGAILAH |
|          |                     | SNV                 | EVPL                | uc010wst.1          | E   | K                         | 59                        | QSLGTEKETAQKECEAF<br>LSTRPVGP | QSLGTEKETAQKCEAF<br>LSTRPVGP  |
|          |                     | SNV                 | MED13               | uc002izo.3          | P   | S                         | 1691                      | PHIKSTVSVQIIPCQYLL<br>QPVKHED | PHIKSTVSVQIISCQYLLQ<br>PVKHED |
|          |                     | SNV                 | HEATR6              | uc010ddk.1          | P   | S                         | 265                       | GEVICKCMGEADPSIQL<br>HGAKLLEE | GEVICKCMGEADSSIQL<br>HGAKLLEE |
|          |                     | SNV                 | ABCC3               | uc002isl.3          | E   | K                         | 209                       | FSAKNVDPNPYPETSAG<br>FLSRLFFW | FSAKNVDPNPYPKTSAG<br>FLSRLFFW |
|          |                     | SNV                 | PLEKHM1             | uc010wjn.1          | R   | C                         | 530                       | EEHTCVENCSSLRCEV<br>GPAHSDGR  | EEHTCVENCSSLCCESV<br>GPAHSDGR |
|          |                     | SNV                 | SLFN14              | uc010ctu.1          | R   | C                         | 827                       | IAILCRRGEDRGRYRLAL<br>LKAMELI | IAILCRRGEDRGCYRLAL<br>LKAMELI |
|          |                     | SNV                 | TVP23B              | uc002gum.2          | S   | F                         | 148                       | VLWVIFAFSALFSFRVK<br>WLAVVIMG | VLWVIFAFSALFFFRVK<br>WLAVVIMG |
|          |                     | SNV                 | KCNG4               | uc010voc.2          | R   | W                         | 257                       | DLRAEEDQGECSRKY<br>IFIVETIC   | DLRAEEDQGECSWKY<br>YIFIVETIC  |
|          |                     | SNV                 | ADAMTS18            | uc002ffc.4          | P   | S                         | 265                       | FCGRRKKYAPKPPTEDT<br>YLRFDEYG | FCGRRKKYAPKPSTEDT<br>YLRFDEYG |
| SNV      | ENSG00000140<br>873 | ENST0000044<br>9265 | S                   | F                   | 266 | CGRRKKCICSQASHRGH<br>LSKV | CGRRKKCICSQAFHRGH<br>LSKV |                               |                               |
| NCI-3998 | TMG6                | SNV                 | TIGD7               | uc021tcc.1          | R   | Q                         | 130                       | DFKASTGWLFRFRNRH<br>AIGNRKGC  | DFKASTGWLFRFQNRH<br>AIGNRKGC  |
|          |                     | SNV                 | CIITA               | uc010bup.1          | G   | E                         | 225                       | SSSSLSCLNLPEGPIQFV<br>PTISTLP | SSSSLSCLNLPEEPIQFVP<br>TISTLP |
|          |                     | SNV                 | EFTUD1              | uc002bgu.1          | E   | D                         | 427                       | QDGSAIETCPKGEEPRG<br>DEQQVESM | QDGSAIETCPKGDEPRG<br>DEQQVESM |
|          |                     | SNV                 | FAH                 | uc010unl.2          | R   | Q                         | 159                       | RLFLSAACYQRRNHVQ<br>GQGEVDA   | RLFLSAACYQRQNHVQ<br>GQGEVDA   |
|          |                     | SNV                 | FAH                 | uc002bfn.2          | G   | R                         | 68                        | DFYSSRQHATNVGIMF<br>RDKENALMP | DFYSSRQHATNVRIMFR<br>DKENALMP |



|          |      |                 |                     |                     |   |   |      |                                |                                                        |
|----------|------|-----------------|---------------------|---------------------|---|---|------|--------------------------------|--------------------------------------------------------|
|          |      | SNV             | NOP10               | uc001zie.1          | T | I | 47   | FSPDDKYSRHRITIKKRF<br>KVLMTQQ  | FSPDDKYSRHRIIIKKRFK<br>VLMTQQ                          |
|          |      | SNV             | ENSG00000182<br>117 | ENST0000055<br>7912 | P | S | 28   | TLKMTNTLDTESPSRNA<br>SRCS      | TLKMTNTLDTESSRNA<br>SRCS                               |
|          |      | SNV             | STON2               | uc010tvu.3          | P | S | 724  | GFSANRDPLTQVPCEN<br>VMIRYPVPS  | GFSANRDPLTQVSCENV<br>MIRYPVPS                          |
|          |      | SNV             | SLC8A3              | uc001xlz.3          | R | C | 889  | RRPHLGGEELGGPRGCK<br>LATTWLFVS | RRPHLGGEELGGPCGCKL<br>ATTWLFVS                         |
|          |      | SNV             | OR4K1               | uc001vwj.2          | A | V | 150  | RRLCVIFVSISWAVGVL<br>HSVSHLAF  | RRLCVIFVSISWVVGVL<br>HSVSHLAF                          |
|          |      | SNV             | AHNAK2              | uc010axc.1          | M | V | 2187 | SVDVSPPKVEADMSLPS<br>MQGDLKTT  | SVDVSPPKVEADVSLPS<br>MQGDLKTT                          |
|          |      | SNV             | HTR2A               | uc010acr.4          | P | S | 405  | RYIQCCQYKENKKPLQLIL<br>VNTIPAL | RYIQCCQYKENKKSLLQLIL<br>VNTIPAL                        |
|          |      | SNV             | NBEA                | uc021rid.1          | P | L | 2468 | REDEVVVNDVDLPPWA<br>KKPEDFVRI  | REDEVVVNDVDLLPWA<br>KKPEDFVRI                          |
|          |      | SNV             | KMT2D               | uc001rta.4          | S | F | 654  | SPMSPPPEVSRLSPLPV<br>VSRLSPPP  | SPMSPPPEVSRLFPLPV<br>VSRLSPPP                          |
|          |      | SNV             | LRRK2               | uc009zjw.3          | P | L | 689  | LLVNPDPQRLTIPISQIA<br>PDLILAD  | LLVNPDPQRLTILISQIAP<br>DLILAD                          |
|          |      | SNV             | EP400               | uc010tbo.2          | P | S | 61   | RKGGKISFCAHTPLNCM<br>FGFFCFVK  | RKGGKISFCAHTSLNCM<br>FGFFCFVK                          |
|          |      | SNV             | HECTD4              | uc021reb.1          | P | S | 2876 | ISESKVNMDVNFPGAA<br>FVVVSCKES  | ISESKVNMDVNFSGAAF<br>VVVVSCKES                         |
| NCI-3998 | TMG7 | FS<br>insertion | SWAP70              | uc001mhw.3          |   |   | 99   | KIEFNRMCWTLCKVKKN<br>LTKNPLLIT | KIEFNRMCWTLCKVKKK<br>HKESPAHYRRRCI                     |
|          |      | FS<br>insertion | ENSG00000133<br>789 | ENST0000052<br>6358 |   |   | 117  | RLNSIGCVGPSVSKKTS<br>QRIPCSLQ  | RLNSIGCVGPSVSKKNLT<br>KNPLITEEDAFKIWWIF<br>NFLSEDKYPLA |
|          |      | SNV             | ZFP91               | uc001nmy.4          | T | I | 233  | EEIPFKDDPRDETYKPHL<br>ERETPKP  | EEIPFKDDPRDEIYKPHL<br>ERETPKP                          |
|          |      | SNV             | PRDM11              | uc031qab.1          | R | W | 216  | SERIYFRACRDIRPGEW<br>LRVWYSED  | SERIYFRACRDIWPGEW<br>LRVWYSED                          |
|          |      | SNV             | MOB2                | uc001ltp.1          | S | F | 176  | LLWGWGLLSQRPFFPL<br>TPPLPASPG  | LLWGWGLLSQRPFFPLT<br>PPLPASPG                          |
|          |      | SNV             | LGI1                | uc021pwk.1          | E | I | 84   | LSFVRSGFTEISEGSFLFT<br>PSLQLL  | LSFVRSGFTEISIGSFLFT<br>PSLQLL                          |
|          |      | SNV             | MYOF                | uc001kio.3          | E | D | 1477 | LKIYNCELENVAEFEGLT<br>DFSDFTK  | LKIYNCELENVADFEGLT<br>DFSDFTK                          |
|          |      | SNV             | POLR3A              | uc001jzn.3          | G | A | 1066 | HFAGVASMNITLGVPRI<br>KEIINASK  | HFAGVASMNITLAVPRI<br>KEIINASK                          |
|          |      | SNV             | C10orf120           | uc001lgn.3          | H | Y | 334  | IWKERM RKATPYHY                | IWKERM RKATPYYY                                        |

|  |  |     |         |            |   |   |      |                               |                               |
|--|--|-----|---------|------------|---|---|------|-------------------------------|-------------------------------|
|  |  | SNV | ACSL5   | uc009xxz.3 | S | F | 148  | GIFAQNRPEWIISELACY<br>TYSMVAV | GIFAQNRPEWIIFELACY<br>TYSMVAV |
|  |  | SNV | PRKAA2  | uc031pms.1 | M | I | 239  | FYLASSPPSGSFMDDSA<br>MHIPPGLK | FYLASSPPSGSFIDDSAM<br>HIPPGLK |
|  |  | SNV | ZBTB41  | uc001gtx.1 | P | L | 425  | NETEFHKKEHKPCYCNK<br>LHASKKTL | NETEFHKKEHKCLYCNK<br>LHASKKTL |
|  |  | SNV | KCNT2   | uc009wyu.3 | G | E | 129  | FETILLGYLSYKGNIEQ<br>ILRIPFI  | FETILLGYLSYKENIWEQI<br>LRIPFI |
|  |  | SNV | INSRR   | uc010pht.2 | D | N | 669  | CHRGLRLPTSNNDRPF<br>DGEDGDPEA | CHRGLRLPTSNNNPRFD<br>GEDGDPEA |
|  |  | SNV | PDE4DIP | uc021ouh.1 | R | Q | 2291 | LLELRTKVSKQERLLQST<br>TEHLKNA | LLELRTKVSKQEQLLQST<br>TEHLKNA |
|  |  | SNV | AP4B1   | uc010owp.2 | P | S | 548  | WLSLKVAHQQVLPWR<br>GEFHPDTLQM | WLSLKVAHQQVLSWR<br>GEFHPDTLQM |

| Patient ID | TMG#  | Mutation type | Gene                | Transcript ID | WT AA | Mut AA                        | AA position                  | Wild-type 25-mer               | Mutated 25-mer                 |
|------------|-------|---------------|---------------------|---------------|-------|-------------------------------|------------------------------|--------------------------------|--------------------------------|
| NCI-3784   | TMG1  | SNV           | ABHD16A             | NM_021160     | P     | S                             | 322                          | WNHPGFAGSTGVFPF<br>QNEANAMDVV  | WNHPGFAGSTGVSFPO<br>NEANAMDVV  |
|            |       | SNV           | ALMS1               | NM_015120     | P     | F                             | 892                          | HLTEEALKVSIVPGPGD<br>KKTGIPSA  | HLTEEALKVSIVFGPGDQ<br>KTGIPSA  |
|            |       | SNV           | ANKHD1-<br>EIF4EBP3 | NM_020690     | P     | S                             | 1555                         | RKNKKNKTKETPPTAH<br>LILPEQHMS  | RKNKKNKTKETPSTAHLIL<br>PEQHMS  |
|            |       | SNV           | ATP8B1              | NM_005603     | R     | K                             | 946                          | RLLLVHGRWSYIRMCK<br>FLRYFFYKN  | RLLLVHGRWSYIKMCKFL<br>RYFFYKN  |
|            |       | SNV           | ATR                 | NM_001184     | L     | F                             | 1405                         | AYGLLMELTRAYLAYA<br>DNSRAQDSA  | AYGLLMELTRAYFAYADN<br>SRAQDSA  |
|            |       | SNV           | ATXN7               | NM_000333     | P     | L                             | 780                          | VNVRHDQSGRGPPTG<br>SPAESIKRMS  | VNVRHDQSGRGPPLTGSP<br>AESIKRMS |
|            |       | SNV           | B4GALT5             | NM_004776     | S     | F                             | 326                          | VSRPEGDTGKYKSIPIH<br>HHRGEVQFL | VSRPEGDTGKYKFIPIHHH<br>RGEVQFL |
|            |       | SNV           | BLM                 | NM_000057     | A     | V                             | 1351                         | MPASQRSKRRKTASS<br>GSKAKGGSAT  | MPASQRSKRRKTVSSGSK<br>AKGGSAT  |
|            |       | SNV           | BRAF                | NM_004333     | V     | E                             | 600                          | LTVKIGDFGLATVKS<br>WSGSHQFEQ   | LTVKIGDFGLATEKSRWS<br>GSHQFEQ  |
|            |       | SNV           | BRAT1               | NM_152743     | T     | I                             | 418                          | APASSVGGHLCGTLAG<br>CVRVQRAAL  | APASSVGGHLCGILAGCV<br>RVQRAAL  |
|            |       | SNV           | BRD9                | NM_023924     | S     | F                             | 554                          | GGSRPSSNLSSLSNASE<br>RDQHHLGS  | GGSRPSSNLSSLFNASER<br>DQHHLGS  |
|            |       | SNV           | BRF1                | NM_001519     | T     | I                             | 109                          | GNQLQLNQHCLDTAF<br>NFFKMAVSRH  | GNQLQLNQHCLDIAFNF<br>FKMAVSRH  |
|            |       | SNV           | C11orf30            | NM_020193     | P     | L                             | 992                          | IHLQADQLQHKLQPM<br>PQLSIRHQKL  | IHLQADQLQHKLQMPQ<br>LSIRHQKL   |
|            |       | SNV           | C2CD3               | NM_015531     | S     | L                             | 486                          | SKKISQSTALARSSKVL<br>ESSDHKLK  | SKKISQSTALARLSKVLESS<br>DHKLK  |
|            |       | SNV           | CAMKK2              | NM_172226     | P     | L                             | 124                          | GGSLDMNGRCICPSLP<br>YSPVSSPQS  | GGSLDMNGRCICLSLPYS<br>PVSSPQS  |
| SNV        | CD164 | NM_006016     | L                   | P             | 50    | PISNVTAPVTSPLPLVT<br>TPAPETCE | PISNVTAPVTSPLPLVTP<br>APETCE |                                |                                |
| NCI-3784   | TMG2  | SNV           | CDCA3               | NM_031299     | P     | S                             | 145                          | EEQMPPWNQTEFPSK<br>QVFSKEEARQ  | EEQMPPWNQTEFSSKQ<br>VFSKEEARQ  |

|          |      |                |                      |                      |   |   |      |                                     |                                        |
|----------|------|----------------|----------------------|----------------------|---|---|------|-------------------------------------|----------------------------------------|
|          |      | SNV            | CDK13                | NM_031267            | R | W | 757  | FPITAIREIKILRQLTHQ<br>SIINMKE       | FPITAIREIKILWQLTHQSII<br>NMKE          |
|          |      | SNV            | CHPF                 | NM_024536            | R | C | 629  | DTVLTPDFLNRCRMH<br>AISGWQAFFP       | DTVLTPDFLNRCMHAIS<br>GWQAFFP           |
|          |      | SNV            | CLEC4F               | NM_173535            | P | S | 19   | RFCTDNQCVSLSHPQE<br>VDSVAMAPAA      | RFCTDNQCVSLSHSQEVD<br>SVAMAPAA         |
|          |      | SNV            | COL5A2               | NM_000393            | G | E | 1110 | GQRGDPGSRGPIGPP<br>GRAGKRGLPG       | GQRGDPGSRGPIEPPGR<br>AGKRGLPG          |
|          |      | SNV            | COL7A1               | NM_000094            | G | E | 1412 | GDKGDRGERGPPGPG<br>EGGIAPGEPG       | GDKGDRGERGPPPEPGE<br>GIAPGEPG          |
|          |      | FS<br>deletion | CTSC                 | NM_148170            |   |   | 42   | CTYLDLLGTWVFQVGS<br>SGSQRDVNC       | CTYLDLLGTWVFRWAPA<br>VPSAMSTARLWDHKKKK |
|          |      | SNV            | CTTN                 | NM_005231            | S | F | 261  | GWDHQEKQLLHESQK<br>DYKTGFGGKF       | GWDHQEKQLLHEFQKD<br>YKTGFGGKF          |
|          |      | SNV            | CTTN                 | NM_138565            | S | F | 261  | GWDHQEKQLLHESQK<br>DYSKGFGGKY       | GWDHQEKQLLHEFQKD<br>YSKGFGGKY          |
|          |      | SNV            | DBF4                 | uc011khf.1           | P | L | 16   | KELVVVHKKQEKPCSP<br>FDVKPSSM        | KELVVVHKKQEKLCSPFD<br>VDKPSSM          |
|          |      | SNV            | DBF4                 | NM_006716            | P | L | 249  | TNMPFINYSIQKPCSPF<br>VDVKPSSM       | TNMPFINYSIQKLCSPFD<br>VDKPSSM          |
|          |      | SNV            | DCLRE1A              | NM_0012718<br>16     | P | H | 1009 | YLEMKRFVQWLKPKQ<br>IIPVNVGTW        | YLEMKRFVQWLKHQKIIP<br>TVNVGTW          |
|          |      | SNV            | DDX42                | NM_007372            | P | L | 565  | VATDVAARGLDIPSIKT<br>VINYDVAR       | VATDVAARGLDILSIKTVI<br>NYDVAR          |
|          |      | SNV            | DHX16                | NM_003587            | P | S | 573  | STFFDDAPVFRIPGRRF<br>PVDIFYTK       | STFFDDAPVFRISGRRFPV<br>DIFYTK          |
|          |      | SNV            | DOLPP1               | NM_020438            | S | F | 111  | MPSSHSQFMWFFSVY<br>SFLFLYLRMH       | MPSSHSQFMWFFFVYSF<br>LFLYLRMH          |
|          |      | SNV            | DTNA                 | NM_032979            | T | I | 87   | ELNVSRLAVALSTIFYQ<br>LNKRMPPT       | ELNVSRLAVALSIIFYQLNK<br>RMPTT          |
| NCI-3784 | TMG3 | SNV            | DTNB                 | NM_183361            | L | F | 110  | STHQISVEQSISSLLNF<br>MIAAYDSE       | STHQISVEQSISSLLNFMI<br>AAYDSE          |
|          |      | SNV            | ENSG00000006<br>634  | ENST00000041<br>3643 | P | S | 229  | KPFVKVEDMSQSPAV<br>HLM              | KPFVKVEDMSQSSAVHL<br>M                 |
|          |      | SNV            | ENSG000000089<br>902 | ENST00000056<br>0472 | T | M | 35   | SGNMAEIFRQSQT                       | SGNMAEIFRQSQM                          |
|          |      | SNV            | ENSG000000099<br>995 | ENST00000041<br>1423 | S | F | 32   | KQPLVRRSVRRRSRSQ<br>RKR             | KQPLVRRSVRRRSRQRK<br>R                 |
|          |      | SNV            | ENSG000000163<br>738 | ENST00000043<br>3372 | P | L | 3    | MDPRVSGILVQLPLPD<br>HVDERTICN       | MDLRVSGILVQLPLP                        |
|          |      | SNV            | ENSG000000164<br>124 | ENST00000051<br>1532 | P | L | 160  | EIPNNTCSMDTTLPLITE<br>HGLQSCSD      | EIPNNTCSMDTTLITEHG<br>LQSCSD           |
|          |      | SNV            | ENSG000000164<br>124 | ENST00000051<br>4558 | P | L | 160  | EIPNNTCSMDTTLPLITE<br>HVSIV         | EIPNNTCSMDTTLITEHV<br>SIV              |
|          |      | SNV            | ENSG000000187<br>098 | ENST00000047<br>8490 | P | L | 103  | KFEEQNRAESECPDG<br>MLKTSSGKKEVPVAIK | KFEEQNRAESECLDG<br>MLKTSSGKKEVPMIAIKTL |
|          |      | SNV            | EPHA2                | NM_004431            | V | M | 643  | TLKAGYTEK                           | KAGYTEK                                |
|          |      | SNV            | ESPL1                | NM_012291            | A | V | 1380 | VCPTESKPEVPQAPRV<br>QQRVQTRLK       | VCPTESKPEVPQVPRVQ<br>QRVQTRLK          |
|          |      | SNV            | EXOC3                | NM_007277            | A | V | 49   | ARKKASVEARLKAAIQ<br>SQLDGVRTG       | ARKKASVEARLKVAIQSQ<br>LDGVRTG          |

|          |      |     |         |                  |   |   |      |                                     |                                       |
|----------|------|-----|---------|------------------|---|---|------|-------------------------------------|---------------------------------------|
|          |      | SNV | EXOC4   | NM_021807        | R | Q | 423  | EPSAQLSYASTGREFA<br>AFFAKKKKQ       | EPSAQLSYASTGQEFAAF<br>FAKKKKKQ        |
|          |      | SNV | FKTN    | NM_0011989<br>63 | G | E | 359  | GKVEDSLELSFQKDD<br>VKLDVFFFY        | GKVEDSLELSFQEKDDVK<br>LDVFFFY         |
|          |      | SNV | FLNA    | NM_0011105<br>56 | R | C | 2049 | VVISQSEIGDASRVRS<br>GQGLHEGH        | VVISQSEIGDASCVRVSG<br>QGLHEGH         |
|          |      | SNV | FLNC    | NM_001458        | P | S | 2595 | IVGSPFKAKVTGPRLSG<br>GHSLHETS       | IVGSPFKAKVTGSRLSGG<br>HSLHETS         |
|          |      | SNV | FREM1   | NM_144966        | G | E | 1200 | TQKPRHGLLIDRGFSK<br>DFSENKQPA       | TQKPRHGLLIDREFSKDFS<br>ENKQPA         |
| NCI-3784 | TMG4 | SNV | FSCN1   | NM_003088        | T | A | 484  | GDHAGVLKASAETVD<br>PASLWEY          | GDHAGVLKASAEAVDPA<br>SLWEY            |
|          |      | SNV | GAA     | NM_0010798<br>03 | S | F | 144  | SYPSYKLENLSSEMGY<br>TATLTRTT        | SYPSYKLENLSSFEMGYT<br>ATLTRTT         |
|          |      | SNV | GNB5    | uc031qrz.1       | P | S | 84   | DMKTALALYEFPPMG<br>LLSALDHGII       | DMKTALALYEFPSMGLLS<br>ALDHGII         |
|          |      | SNV | GNB5    | NM_016194        | P | L | 377  | GHENRVSTLRVSPDGT<br>AFCSGSWDH       | GHENRVSTLRVSLDGTA<br>FCSGSWDH         |
|          |      | SNV | GPATCH8 | NM_0010029<br>09 | S | F | 865  | RSRSGRRHSSHRSRR<br>SYSSSDAS         | RSRSGRRHSHRFSRRSY<br>SSSDAS           |
|          |      | SNV | GPR98   | NM_032119        | R | Q | 6009 | YVLVMNDEHTERRYL<br>FFLLSWGGLP       | YVLVMNDEHTERQYLLFF<br>LLSWGGLP        |
|          |      | SNV | GPRIN1  | NM_052899        | P | L | 887  | PMTMQAAAPPAPFEV<br>RVRPGSALAA       | PMTMQAAAPPAPFLEVRV<br>RPGSALAA        |
|          |      | SNV | GSE1    | NM_014615        | R | Q | 718  | LKPGSPYRPPVPRAPD<br>PAYIYDEFL       | LKPGSPYRPPVPQAPDPA<br>YIYDEFL         |
|          |      | SNV | HIF3A   | NM_152795        | E | K | 17   | LQRARSTTELKRSRD<br>AARSRRSQ         | LQRARSTTELKRSRDA<br>ARSRRSQ           |
|          |      | SNV | HIF3A   | NM_152794        | E | K | 15   | WQDHRSTTELKRSR<br>DAARSRRSQ         | WQDHRSTTELKRSRD<br>AARSRRSQ           |
|          |      | SNV | IFIT5   | NM_012420        | G | E | 98   | SDKEEVRSVLTWGN<br>AWVYHMDQL         | SDKEEVRSVLTWENYAW<br>VYHMDQL          |
|          |      | SNV | IFT140  | NM_014714        | R | K | 1141 | CSDFFIEHSQYERAVEL<br>LLAARKYQ       | CSDFFIEHSQYEKAVELL<br>AARKYQ          |
|          |      | SNV | IK      | uc003lgq.3       | P | L | 555  | KKMEADGVEVKRPKY<br>ELSGSDNVPYVTLSSV | KKMEADGVEVKRLKY<br>ELSGSDNVPYVILLSVIN |
|          |      | SNV | INF2    | NM_032714        | T | I | 196  | INAVILGP                            | INAVILGP                              |
|          |      | SNV | IRF2BP1 | NM_015649        | S | F | 7    | MASVQASRRQWCYLC<br>DLPKMPWAMV       | MASVQAFRRQWCYLCD<br>LPK               |
|          |      | SNV | ITCH    | NM_0012571<br>37 | V | I | 831  | IDNEKRMRLQFVTGT<br>CRLPVGGA         | IDNEKRMRLQFITGT<br>CRLPVGGA           |
| NCI-3784 | TMG5 | SNV | ITPR3   | NM_002224        | H | N | 290  | SSNALWEVEVVHNDP<br>CRGGAGHWNG       | SSNALWEVEVVHNDP<br>CRGGAGHWNG         |
|          |      | SNV | KAZN    | NM_015209        | T | I | 409  | QRKSLDPGLFDGTAPD<br>YYIEEDADW       | QRKSLDPGLFDGIAPD<br>YYIEEDADW         |
|          |      | SNV | KDM7A   | NM_030647        | D | N | 758  | YSTCLQRQIQSTDCSG<br>ERNLQDPS        | YSTCLQRQIQSTNC<br>ERNLQDPS            |
|          |      | SNV | KIF16B  | NM_024704        | L | P | 1009 | REKQREALERALARL<br>ERRHSALQR        | REKQREALERAPARLER<br>RHSALQR          |
|          |      | SNV | KRT10   | NM_000421        | S | Y | 547  | SGGGGGYGGGSSG<br>GGSSGGGYGG         | SGGGGGYGGGSSG<br>SSGGGGYGG            |
|          |      | SNV | LPHN2   | NM_012302        | R | Q | 803  | TQGCKLVDNKTTRTTC<br>ACSHLTNFA       | TQGCKLVDNKTQTTC<br>ACSHLTNFA          |
|          |      | SNV | LTBP4   | uc002ooj.1       | P | L | 281  | DDFEALCNVLRPPAYS<br>PPRPGGFGL       | DDFEALCNVLRPLAYSPP<br>RPGGFGL         |

|          |        |          |                     |                  |        |           |      |                               |                                |
|----------|--------|----------|---------------------|------------------|--------|-----------|------|-------------------------------|--------------------------------|
|          |        | SNV      | MBNL2               | NM_207304        | G      | S         | 119  | GTPLHPVPTFPVGP<br>GTNTAISFA   | GTPLHPVPTFPVSPAIG<br>NTAISFA   |
|          |        | SNV      | MED4                | NM_014166        | R      | W         | 173  | VCAPLTWVPGDPRR<br>YPTDLEMRSRG | VCAPLTWVPGDPWRPYP<br>TDLEMRSRG |
|          |        | SNV      | MFI2                | NM_033316        | R      | K         | 190  | ETSYSESLCRLCRGDSS<br>GEGVCDKS | ETSYSESLCRLCKGDSSGE<br>GVCDKS  |
|          |        | SNV      | MITF                | NM_198177        | P      | L         | 194  | KFEEQNRAESECPGM<br>NTHSRASCMQ | KFEEQNRAESECLGMNT<br>HSRASCMQ  |
|          |        | SNV      | MOSPD3              | NM_0010400<br>98 | P      | L         | 141  | KDITSILRAPAYPLELQ<br>GQDPAPR  | KDITSILRAPAYLLELQGG<br>PDPAPR  |
|          |        | SNV      | MTHFD2L             | NM_0011449<br>78 | P      | L         | 138  | ELLDVTDQLNMDPRV<br>SGILVQLPLP | ELLDVTDQLNMDLRVSGI<br>LVQLPLP  |
|          |        | SNV      | MYH9                | NM_002473        | R      | Q         | 1576 | AMKAQFERDLQGRDE<br>QSEKKKQLV  | AMKAQFERDLQGQDEQ<br>SEKKKQLV   |
|          |        | SNV      | NBPF9               | uc010oye.3       | M      | I         | 217  | VSAGPLSSEKAEMNIL<br>EINEKLHPQ | VSAGPLSSEKAENILEINE<br>KLHPQ   |
|          |        | SNV      | NCLN                | NM_020170        | A      | V         | 202  | GVQSKAVSDWLIASVE<br>GRLTGLGGE | GVQSKAVSDWLIVSVEG<br>RLTGLGGE  |
| NCI-3784 | TMG6   | SNV      | NCOA2               | NM_006540        | S      | F         | 593  | DSKDCFLYGEPESEGT<br>TGQAESSCH | DSKDCFLYGEPEFEGTTG<br>QAESSCH  |
|          |        | SNV      | NELL1               | NM_201551        | E      | K         | 433  | GYISVQGDSAYCEDID<br>ECAAKMHYC | GYISVQGDSAYCKDIDEC<br>AAKMHYC  |
|          |        | SNV      | NFKB1               | NM_003998        | S      | F         | 618  | GADLSLLDRLGNSVLH<br>LAAKEGHDK | GADLSLLDRLGNFVLHLA<br>AKEGHDK  |
|          |        | SNV      | NOL6                | NM_139235        | Q      | L         | 380  | TMSGYQVLRSVLQFLA<br>TTDLTVNGI | TMSGYQVLRSVLLFLATT<br>DLTVNGI  |
|          |        | SNV      | NOL6                | uc010mjv.3       | Q      | L         | 380  | TMSGYQVLRSVLQFLD<br>LTVNGISLC | TMSGYQVLRSVLLFLDLT<br>VNGISLC  |
|          |        | SNV      | NOL8                | NM_0012563<br>94 | R      | C         | 291  | KLHSLIGLGIKNRVSCH<br>DSDDDIMR | KLHSLIGLGIKNVCSCHDS<br>DDDIMR  |
|          |        | SNV      | NPIP5               | NM_0011358<br>65 | P      | L         | 388  | PLPPSADDNLKTPSER<br>QLTPLPPSA | PLPPSADDNLKTLSEKRL<br>TPLPPSA  |
|          |        | SNV      | NQO2                | NM_000904        | P      | S         | 103  | KVREADLVIFQPLYW<br>FSVPAILKG  | KVREADLVIFQFSLYWFS<br>VPAILKG  |
|          |        | SNV      | PABPC5              | NM_080832        | P      | L         | 183  | NNRQVYVGRFKFPEER<br>AAEVTRDR  | NNRQVYVGRFKFLEERA<br>AEVTRDR   |
|          |        | SNV      | PAM                 | NM_0011773<br>06 | G      | D         | 861  | KMQEKQKLIKEPGSGV<br>PVVLTITLL | KMQEKQKLIKEPDSGVP<br>VLTITLL   |
|          |        | SNV      | PARP10              | NM_032789        | P      | L         | 1015 | TCEHVPRASPDDPSGL<br>PGRSPDT   | TCEHVPRASPDDLSGLPG<br>RSPDT    |
|          |        | SNV      | PCDH18              | NM_019035        | D      | N         | 886  | GRGDSEAGSDYDLG<br>RDSPIRLLG   | GRGDSEAGSDYNLGRD<br>SPIDRLLG   |
|          |        | SNV      | PCSK7               | NM_004716        | P      | L         | 14   | PKGRQKVPPLDAPLGL<br>PTCLWLELA | PKGRQKVPPLDALLGLPT<br>CLWLELA  |
|          |        | SNV      | PHIP                | NM_017934        | P      | L         | 166  | KLNGKYRLERLVPTAV<br>YQHMKMHR  | KLNGKYRLERLVLTAVYQ<br>HMKMHR   |
|          |        | SNV      | PHOSPHO2-<br>KLHL23 | NM_0011992<br>90 | S      | F         | 268  | IYNALNPMHKEISQRS<br>TATMYIIGG | IYNALNPMHKEIFQRSTA<br>TMYIIGG  |
|          |        | SNV      | PI4K2A              | NM_018425        | L      | F         | 162  | VFKPKNEEPYGHLPK<br>WTKWLQKLC  | VFKPKNEEPYGHFNPKW<br>TKWLQKLC  |
|          |        | NCI-3784 | TMG7                | SNV              | PRR14L | NM_173566 | P    | S                             | 2020                           |
| SNV      | PRRC2A |          |                     | NM_080686        | P      | S         | 1098 | ETRSEGSEYEEIPKRRR<br>QRGSETGS | ETRSEGSEYEEISKRRRQR<br>GSETGS  |

|                 |             |                 |            |                  |   |   |      |                                |                               |
|-----------------|-------------|-----------------|------------|------------------|---|---|------|--------------------------------|-------------------------------|
|                 |             | SNV             | PTPN11     | NM_080601        | H | Y | 426  | TVWQYHFRTWPDHG<br>VPSDPGGVLD   | TVWQYHFRTWPDYGP<br>SDPGGVLD   |
|                 |             | SNV             | RALGDS     | uc004ccv.1       | H | Y | 629  | AALQPAGGRLLYHPR<br>QPGRGQWQH   | AALQPAGGRLLYPRQP<br>GRGQWQH   |
|                 |             | SNV             | RAP1GDS1   | NM_021159        | E | K | 571  | ICALMGSECLHKEVQD<br>LAFLDVVSK  | ICALMGSECLHKKVQDLA<br>FLDVVSK |
|                 |             | SNV             | RNF145     | NM_144726        | P | S | 256  | ALGMSLWNQLVVPVL<br>FMVFWLVLFA  | ALGMSLWNQLVVSVLF<br>MVFWLVLFA |
|                 |             | NFS<br>deletion | RPL11      | NM_0011998<br>02 |   |   | 97   | GLKVREYELRKNNFSD<br>TGNFGFGIQ  | GLKVREYELRKNNSDTGN<br>FGFGIQE |
|                 |             | SNV             | RRBP1      | uc021waw.1       | Q | P | 436  | GAQNQKKAEQAQ<br>QKKAEGAQ       | GAQNQKKAEQAPNQ<br>KKAEGAQ     |
|                 |             | SNV             | SCRIB      | NM_182706        | S | F | 1561 | TPVEDLGPQTSTSPGR<br>LPLSGKKFD  | TPVEDLGPQTSTFPGRLP<br>LSGKKFD |
|                 |             | SNV             | SCRIB      | NM_015356        | S | F | 1561 | TPVEDLGPQTSTSPGR<br>LSPDFAEEL  | TPVEDLGPQTSTFPGRLS<br>PDFAEEL |
|                 |             | SNV             | SEC31A     | NM_016211        | E | K | 435  | QQHHVFISQVVEKEF<br>LSRSDQLQ    | QQHHVFISQVVKKEFLS<br>RSDQLQ   |
|                 |             | SNV             | SENP5      | NM_152699        | L | F | 503  | ASPVDEQLSVCLSGF<br>LDEVMMKYG   | ASPVDEQLSVCFSGFLD<br>EVMKYG   |
|                 |             | SNV             | SERINC2    | uc009vtw.1       | L | F | 143  | GLVLLRRRGLLPHPHP<br>AGAAHRLC   | GLVLLRRRGLLPHFHPA<br>GAAHRLC  |
|                 |             | SNV             | SETD2      | NM_014159        | C | Y | 1501 | KSHRDIKRMQCECTPL<br>SKDERAQGE  | KSHRDIKRMQCEYTPLSK<br>DERAQGE |
|                 |             | SNV             | SH3TC2     | NM_024577        | H | Y | 243  | LVSALPLPLPFHQWF<br>LKNYPGSCG   | LVSALPLPLPFYQWFLK<br>NYPGSCG  |
|                 |             | SNV             | SLC30A5    | NM_022902        | L | P | 594  | GGGMNANMRGVFLH<br>VLADTLGSIGV  | GGGMNANMRGVFPHV<br>LADTLGSIGV |
| <b>NCI-3784</b> | <b>TMG8</b> | SNV             | SLIT2      | NM_004787        | G | E | 715  | QDVAIQDFTCDGND<br>DNSCSPLSRC   | QDVAIQDFTCDENDDN<br>SCSPLSRC  |
|                 |             | SNV             | SNW1       | NM_012245        | F | L | 499  | GREGPVQFEEDPFGLD<br>KFLEEAKQH  | GREGPVQFEEDPLGLDKF<br>LEEAKQH |
|                 |             | SNV             | SON        | NM_138927        | R | C | 1927 | RKTVRARSRTPSRRSRS<br>HTPSRRRR  | RKTVRARSRTPSCRSRSH<br>TPSRRRR |
|                 |             | SNV             | SPATA20    | NM_022827        | P | S | 285  | EEYGGFAEAPKFPTPVI<br>LSFLFSYW  | EEYGGFAEAPKFSTPVILS<br>FLFSYW |
|                 |             | SNV             | ST6GALNAC3 | NM_152996        | P | L | 252  | DTYCKTEGYRKVPYHY<br>YEQGRDECD  | DTYCKTEGYRKVLYHYE<br>QGRDECD  |
|                 |             | SNV             | ST6GALNAC3 | uc010orh.1       | P | L | 151  | TGKDRTEGYRKVPYHY<br>YEQGRDECD  | TGKDRTEGYRKVLYHYE<br>QGRDECD  |
|                 |             | SNV             | STS        | NM_000351        | E | K | 532  | EPRFYEILKVMQEAAD<br>RHTQTLPEV  | EPRFYEILKVMQKAADRH<br>TQTLPEV |
|                 |             | SNV             | SZT2       | NM_015284        | S | L | 1576 | LTLPLEVELPTASDPQH<br>HRSTSESS  | LTLPLEVELPTALDPQHH<br>RSTSESS |
|                 |             | SNV             | TAF8       | NM_138572        | P | L | 277  | AEKENTSVLQQNPSLS<br>GSRNGEENI  | AEKENTSVLQQNLSLGS<br>RNGEENI  |
|                 |             | SNV             | TAF8       | uc003oru.1       | P | S | 318  | PRRRTPLSCSRTPPCRV<br>AGMGRRTS  | PRRRTPLSCSRTSPCRVA<br>GMGRRTS |
|                 |             | SNV             | TBL1XR1    | NM_024665        | P | L | 305  | WDAHTGEAKQQFPF<br>HSAPALDVDWQ  | WDAHTGEAKQQFLHSA<br>PALDVDWQ  |
|                 |             | SNV             | TMEM144    | NM_018342        | P | L | 160  | EIPNNTCSMDTTLPLITE<br>HVINTTQD | EIPNNTCSMDTTLITEHV<br>INTTQD  |
|                 |             | SNV             | TRIM24     | NM_015905        | P | L | 750  | VIVKQESDEESRPQNA<br>NYPRISLTS  | VIVKQESDEESRLQNA<br>PRISLTS   |
|                 |             | SNV             | TRIM35     | NM_171982        | D | N | 115  | LHRGQLSLFCLDKELL<br>CCSCQADP   | LHRGQLSLFCLDKELLCC<br>SCQADP  |
|                 |             | SNV             | TRIM51     | NM_032681        | H | Y | 346  | QAFTSGKYYWEVHM                 | QAFTSGKYYWEVYMGDS             |

|          |      |     |        |                  |   |   | GDSWNWAFGVC | WNWAFGVC                       |                                |
|----------|------|-----|--------|------------------|---|---|-------------|--------------------------------|--------------------------------|
| NCI-3784 | TMG9 | SNV | TLL5   | NM_015072        | Y | F | 279         | LTNYSVNKKSGDYVSC<br>DDPEVEDYG  | LTNYSVNKKSGDFVSCDD<br>PEVEDYG  |
|          |      | SNV | WDFY3  | NM_014991        | S | T | 3352        | LDEKDGFIIVNYSEGG<br>TRAHLQGPL  | LDEKDGFIIVNYTEGQTR<br>AHLQGPL  |
|          |      | SNV | WDR20  | NM_0012424<br>17 | P | S | 459         | NSVTTPGNSVPPPLPR<br>SNSLPHSAV  | NSVTTPGNSVPPSLPRSN<br>SLPHSAV  |
|          |      | SNV | ZBTB4  | NM_020899        | R | Q | 691         | AGGASVGGGSLPRGR<br>RPPRWQRKLE  | AGGASVGGGSLPQGRPR<br>PRWRQKLE  |
|          |      | SNV | ZBTB9  | NM_152735        | R | W | 409         | KRDRHIMLTFSLRPF<br>CGICNKRFK   | KRDRHIMLTFSLWPF<br>GICNKRFK    |
|          |      | SNV | ZC3H13 | NM_015070        | P | S | 1102        | PGSTPSPSLPPPPP<br>VATATATT     | PGSTPSPSLPPPPVA<br>TATATT      |
|          |      | SNV | ZFAT   | NM_0010299<br>39 | E | K | 1214        | GGEASEFIVVQEQAM<br>QPVEEQAVEQ  | GGEASEFIVVQKAMQP<br>VEEQAVEQ   |
|          |      | SNV | ZNF25  | NM_145011        | P | S | 215         | ECNQCEKSFYQKPHLT<br>EHQKTHTGE  | ECNQCEKSFYQKSHLTH<br>EQKTHTGE  |
|          |      | SNV | ZNF32  | NM_006973        | S | F | 85          | RQRVYECQECGKFR<br>QKGSLLTHER   | RQRVYECQECGKFR<br>GSLTHER      |
|          |      | SNV | ZNF346 | NM_012279        | H | Y | 108         | KHANKVKRYLAIHGM<br>ETLKGETKKL  | KHANKVKRYLAIYGMET<br>LAIYGMETL |
|          |      | SNV | ZNF703 | NM_025069        | S | F | 182         | SGSSVSSTSSSSSSP<br>GDKAGFRV    | SGSSVSSTSSSFSSPGD<br>KAGFRV    |
|          |      | SNV | ZNF714 | uc002npl.3       | K | E | 382         | RSGVQDQPGQHKGKTP<br>SLLKIQKFAG | RSGVQDQPGQHGETPSL<br>LKIQKFAG  |
|          |      | SNV | ZNF761 | NM_0010084<br>01 | T | I | 342         | ECGKTRQKSILTRHH<br>RLHTGEKPY   | ECGKTRQKSILIRHRLH<br>TGEKPY    |

| Patient ID | TMG# | Mutation type | Gene     | Transcript ID       | WT AA | Mut AA | AA position | Wild-type 25-mer              | Mutated 25-mer                   |
|------------|------|---------------|----------|---------------------|-------|--------|-------------|-------------------------------|----------------------------------|
| NCI-3903   | TMG1 | SNV           | ANKDD1B  | NM_0012767<br>13    | L     | P      | 221         | AAERGHVEMIEKLTFL<br>NLHTSEKDK | AAERGHVEMIEKPTFLNL<br>HTSEKDK    |
|            |      | SNV           | C12orf28 | uc010stn.1          | P     | L      | 71          | LQVPEITFCEILPCQETY<br>CCPIRGM | LQVPEITFCEILLCQETYCC<br>PIRGM    |
|            |      | SNV           | C3orf56  | NM_0010075<br>34    | E     | K      | 171         | WTPASSAPRAAVEGP<br>SRGAPYLKTC | WTPASSAPRAAVKGP<br>SRGAPYLKTC    |
|            |      | SNV           | MRDS1    | uc003myh.1          | G     | A      | 125         | NLLEEDDELHSQGD<br>TDHSVKGKS   | NLLEEDDELHSQADSL<br>TDHSVKGKS    |
|            |      | SNV           | MUC3A    | uc003uxl.1          | S     | F      | 18          | MTLRITENTPISSF<br>VVIPETP     | MTLRITENTPISFFS<br>VIPETP        |
|            |      | SNV           | ZNF487   | ENST0000043<br>1662 | R     | Q      | 8           | LIRHQRIHTGEKPY<br>ECGDSFSH    | MASRPPQTPSRGSD<br>LIRHQRIHTGEKPY |
|            |      | SNV           | ZNF891   | NM_0012772<br>91    | P     | S      | 108         | RFSNRSHLLQHRV<br>GERPYRCLQ    | DQEIRNMKKRISQA<br>GERPYRCLQ      |
|            |      | SNV           | CALU     | uc003vns.3          | W     | S      | 96          | KDGFVTVDELKDWI<br>AQKRWIYED   | KDGFVTVDELKDSI<br>AQKRWIYED      |
|            |      | SNV           | RPL5     | NM_000969           | E     | K      | 70          | RDIIQIAYARIEGDM<br>VCAAYAHE   | RDIIQIAYARIKGM<br>VCAAYAHE       |
|            |      | SNV           | EIF3A    | NM_003750           | R     | Q      | 794         | RLAERHNRLEERKR<br>RKEERRITY   | RLAERHNRLEEQRK<br>RKEERRITY      |
|            |      | SNV           | LAMA1    | NM_005559           | E     | K      | 78          | CRICDGNANPRRHP<br>ISHAIDGTN   | CRICDGNANPRKRHP<br>ISHAIDGTN     |

|          |          |          |            |                  |       |                  |     |                                |                                |
|----------|----------|----------|------------|------------------|-------|------------------|-----|--------------------------------|--------------------------------|
|          |          | SNV      | GADD45GIP1 | NM_052850        | R     | C                | 23  | LLGVAATLAPGSRGYR<br>ARPPRRRP   | LLGVAATLAPGSCGYRAR<br>PPRRRP   |
| NCI-3903 | TMG2     | SNV      | C19orf2    | NM_0012526<br>41 | R     | K                | 386 | GSGHSAQELPTIRTPA<br>DIYRAFVDV  | GSGHSAQELPTIKTPADIY<br>RAFVDV  |
|          |          | SNV      | RUVBL1     | NM_003707        | G     | E                | 421 | LLTPANLLAKINGKDSI<br>EKEHVEEI  | LLTPANLLAKINEKDSIEKE<br>HVEEI  |
|          |          | SNV      | RND3       | NM_0012547<br>38 | A     | D                | 44  | SQCGKTALLHVFAKDC<br>FPENYVPTV  | SQCGKTALLHVFDKDCFP<br>ENYVPTV  |
|          |          | SNV      | MATN2      | uc003yid.3       | E     | K                | 421 | NKPGCEHECVNMEES<br>YYCRCHRGYT  | NKPGCEHECVNMKESYY<br>CRCHRGYT  |
|          |          | SNV      | EPB41L2    | NM_0011355<br>54 | R     | C                | 516 | PKAKFLTLSKFRYSGR<br>TQAQTRQA   | PKAKFLTLSKFCYSGR<br>QAQTRQA    |
|          |          | SNV      | DIP2B      | NM_173602        | D     | N                | 401 | LGTKNEPVLKPGDRVA<br>LVYPNNDPV  | LGTKNEPVLKPGNRVALV<br>YPNNDPV  |
|          |          | SNV      | CMTM6      | NM_017801        | E     | K                | 162 | LDFITMLYEKRQESQL<br>RKPENTTRA  | LDFITMLYEKRQKSQLRK<br>PENTTRA  |
|          |          | SNV      | RNF10      | NM_014868        | D     | N                | 747 | ENSLVPPAPVSDGES<br>DNSDRVPVP   | ENSLVPPAPVDSNGESD<br>NSDRVPVP  |
|          |          | SNV      | SSFA2      | NM_0012875<br>04 | R     | Q                | 288 | QPVSRRSSVSKQSCE<br>SITDEFERF   | SNKETDPPPPLTQSNTAN<br>RLMKTLS  |
|          |          | SNV      | MARK3      | NM_0011289<br>21 | S     | R                | 443 | AYPKRSQTSTADSDLK<br>EDGISSRKS  | AYPKRSQTSTADRLKED<br>GISSRKS   |
|          |          | SNV      | PSMF1      | NM_006814        | P     | L                | 224 | PLRSGFPRALIDPSSGL<br>PNRLPPGA  | PLRSGFPRALIDLSSGLPN<br>RLPPGA  |
|          |          | SNV      | C12orf49   | NM_024738        | R     | C                | 70  | PWKVQFNLGNSSRPS<br>NQCRNSIQGK  | PWKVQFNLGNSSCPSNQ<br>CRNSIQGK  |
|          |          | NCI-3903 | TMG3       | SNV              | STK25 | NM_0012719<br>78 | P   | L                              | 214                            |
| SNV      | CSNK1E   |          |            | NM_001894        | Y     | H                | 201 | EQSRRDDLESGLGYVLM<br>YFNLGSLPW | EQSRRDDLESGLGHVLMYF<br>NLGSLPW |
| SNV      | VKORC1L1 |          |            | NM_0012843<br>42 | E     | K                | 45  | LSVSASPEKSYSRPSPL<br>VLPSSRIE  | AYHVEREKERDPKHRALC<br>DLGPWVK  |
| SNV      | CRELD1   |          |            | NM_015513        | R     | Q                | 220 | HLVCSACFGPCARCSG<br>PEESNCLQC  | HLVCSACFGPCAQCSPGE<br>ESNCLQC  |
| SNV      | PLXND1   |          |            | NM_015103        | P     | S                | 134 | DLTKELNRSQGIPFLEY<br>KHFVTRTF  | DLTKELNRSQGISFLEYKH<br>FVTRTF  |
| SNV      | KIAA1967 |          |            | NM_021174        | H     | Y                | 227 | KKPRHDLPPYRVHLTP<br>YTVDSPICD  | KKPRHDLPPYRVYLTPYT<br>VDSPICD  |
| SNV      | NUP107   |          |            | NM_020401        | G     | E                | 392 | GWKLYHDPNVNGGTE<br>LEPVEGNPYR  | GWKLYHDPNVNGETELE<br>PVEGNPYR  |
| SNV      | RCC1     |          |            | NM_001269        | G     | E                | 407 | QLENRVVLSVSSGGQ<br>HTVLLVKDKE  | QLENRVVLSVSSEGQHTV<br>LLVKDKE  |
| SNV      | DHX38    |          |            | NM_014003        | S     | L                | 305 | GRGRREEGEEGIFDFT<br>EEERQQWED  | GRGRREEGEEGILFDTEE<br>ERQQWED  |
| SNV      | UBTF     |          |            | NM_0010766<br>83 | P     | S                | 202 | TLECTVAGTPELSTKW<br>FKDGKELTS  | AKKSDIPEKPKTSQQLWY<br>THEKKVY  |
| SNV      | LSG1     |          |            | NM_018385        | L     | F                | 433 | TKHFQTLVVEPGLCLC<br>DCPGLVMPS  | TKHFQTLVVEPGFCLCDC<br>PGLVMPS  |
| SNV      | NUP98    |          |            | NM_005387        | P     | L                | 381 | KLTTFGSSTTSAPSGFT<br>TSGGLFGN  | KLTTFGSSTTSALSFGTTS<br>GGLFGN  |
| NCI-3903 | TMG4     |          |            | SNV              | RBM6  | NM_0011675<br>82 | P   | S                              | 884                            |
|          |          | SNV      | CPSF2      | NM_017437        | I     | V                | 523 | MDQDLSDVPTKCISTT<br>ESIEIKARV  | MDQDLSDVPTKCVSTTE<br>SIEIKARV  |
|          |          | SNV      | TNS3       | NM_022748        | P     | L                | 711 | IEQLNRLILELDPTFEPI<br>PTHMNAL  | IEQLNRLILELDLTFEPIPT<br>HMNAL  |
|          |          | SNV      | BLVRB      | uc002onw.2       | S     | F                | 88  | GTRNDLSPTTVMSEG<br>ARNIVAAMKA  | GTRNDLSPTTVMFEGAR<br>NIVAAMKA  |



|          |         |                 |            |            |       |            |      |                                |                                |                               |                              |
|----------|---------|-----------------|------------|------------|-------|------------|------|--------------------------------|--------------------------------|-------------------------------|------------------------------|
|          |         | SNV             | CLDN1      | uc003fsh.3 | T     | Y          | 80   | DSLLNLSSTLQATRAL<br>MVGILLGV   | DSLLNLSSTLQAYRALMV<br>VGILLGV  |                               |                              |
|          |         | SNV             | LMBR1      | uc010lqn.3 | G     | E          | 259  | LQRRNLVGMMLCAGNP<br>EVATGRQVPE | LQRRNLVGMMLCAENPEV<br>ATGRQVPE |                               |                              |
|          |         | SNV             | TJP1       | uc010azl.3 | P     | L          | 364  | VSTPVKHADDHTPKTV<br>EEVTVNERNE | VSTPVKHADDHTLKTVEE<br>VTVNERNE |                               |                              |
|          |         | SNV             | GPD1L      | uc003cew.3 | E     | K          | 126  | KALGITLIKIGIDEGPEGL<br>KLISDII | KALGITLIKIGIDKGPEGLK<br>ISDII  |                               |                              |
|          |         | SNV             | FAM176A    | uc002snk.1 | E     | K          | 125  | TSAEELERAQRLEERER<br>IIREIWMN  | TSAEELERAQLKERERIIR<br>EIWMN   |                               |                              |
|          |         | SNV             | TDRD7      | uc004axj.3 | V     | G          | 59   | PTLEAYLRSVPAVVRIE<br>TSRSGEIT  | PTLEAYLRSVPAGVRIETS<br>RSGEIT  |                               |                              |
|          |         | SNV             | TBC1D15    | uc010stt.2 | G     | R          | 368  | NVDNMKQMIFRGGLS<br>HALRKQAWKF  | NVDNMKQMIFRGRLSH<br>ALRKQAWKF  |                               |                              |
|          |         | SNV             | NFATC3     | uc010vlb.2 | A     | T          | 1024 | IKPEPEDREPINFATIGL<br>QDITLDDV | IKPEPEDREPNTTIGLQD<br>ITLDDV   |                               |                              |
| NCI-3903 | TMG5    | SNV             | KRT18      | uc009zmn.2 | R     | K          | 325  | MRNLKASLENSLREVE<br>ARYALQMEQ  | MRNLKASLENSLKEVEAR<br>YALQMEQ  |                               |                              |
|          |         | SNV             | CSGALNACT1 | uc011kyp.2 | P     | S          | 404  | PGIYGHHDVAPPPLEQ<br>QLVIKKETG  | PGIYGHHDVAPPSLEQQ<br>VIKKETG   |                               |                              |
|          |         | SNV             | PCYT2      | uc031rex.1 | P     | L          | 321  | KTEIIPDRDGDSPYQEP<br>KRRGIFRQ  | KTEIIPDRDGDSDLYQEPKR<br>RGIFRQ |                               |                              |
|          |         | SNV             | SEC24B     | uc011cfq.2 | P     | L          | 371  | EYVNNQASSAPTPLSS<br>TSDDEEEEE  | EYVNNQASSAPTTLSSTS<br>DDEEEEE  |                               |                              |
|          |         | SNV             | CARKD      | uc001vrc.3 | P     | L          | 342  | TPTSPHLLLSPPQVQP<br>SPGGRVWR   | TPTSPHLLLSPLQVQVQSP<br>GGRVWR  |                               |                              |
|          |         | SNV             | PIGN       | uc021ulb.1 | T     | K          | 916  | FLVFLNGLAQLLTTKKL<br>RLCGKPKS  | FLVFLNGLAQLLTKKRL<br>CGKPKS    |                               |                              |
|          |         | SNV             | SUMF1      | uc003bpz.2 | G     | N          | 17   | ALGLVCGRCPELGLVLL<br>LLLLLLC   | ALGLVCGRCPELNLVLLL<br>LLLLLLC  |                               |                              |
|          |         | NFS<br>deletion | LARP7      | uc003iay.4 |       |            | 22   | KVMEEESTEKKKEVEK<br>KKRSRVKQV  | KVMEEESTEKKKVEKKR<br>SRVKQV    |                               |                              |
|          |         | SNV             | FAM120B    | uc003qxp.3 | E     | K          | 178  | YGLQHNCLGILGEDTD<br>YLIYDTCPY  | YGLQHNCLGILGKDTDYLI<br>YDTCPY  |                               |                              |
|          |         | SNV             | TRPM7      | uc010bew.2 | S     | F          | 103  | AYGVINFQGGSHSYRA<br>KYVRLSYDT  | AYGVINFQGGSHFYRAKY<br>VRLSYDT  |                               |                              |
|          |         | SNV             | USP6NL     | uc001ikt.3 | R     | H          | 687  | LSVSASPEKSYSRPSPL<br>VLPSSRIE  | LSVSASPEKSYSRPSPLV<br>PSSRIE   |                               |                              |
|          |         | SNV             | LIG3       | uc010cth.1 | E     | K          | 464  | ERVLHNAQEVEKEPG<br>QRRALSVQAS  | ERVLHNAQEVEKKPGQR<br>RALSVQAS  |                               |                              |
|          |         | NCI-3903        | TMG6       | SNV        | CAPN7 | uc003bzn.3 | P    | S                              | 806                            | EGPFFLDFNSIPIKITQL<br>Q       | EGPFFLDFNSIISIKITQLQ         |
|          |         |                 |            | SNV        | DBR1  | uc003erv.3 | H    | Y                              | 182                            | IFLSHDWPRSIYHYGN<br>KKQLLTKTS | IFLSHDWPRSIYYGNKK<br>QLLTKTS |
| SNV      | UNC119B |                 |            | uc001tyz.4 | EH    | DP         | 180  | SNFRMIERHYFREHLL<br>KNFDFDFGFC | SNFRMIERHYFRDPLLKN<br>FDFDFGFC |                               |                              |
| SNV      | UNC119B |                 |            | uc001tyz.4 | E     | D          | 180  | SNFRMIERHYFREHLL<br>KNFDFDFGF  | SNFRMIERHYFRDHLKN<br>FDFDFGF   |                               |                              |
| SNV      | PMS2CL  |                 |            | uc011jxb.1 | P     | L          | 84   | TSDAISDKGVLRPQKE<br>AVSSSQGPS  | TSDAISDKGVLRQLQKEAV<br>SSSQGPS |                               |                              |
| SNV      | RNF213  |                 |            | uc021uen.2 | P     | L          | 837  | VFMMVVVCIELKIPLFLV<br>GKPGSSKS | VFMMVVVCIELKILLFLVGK<br>PGSSKS |                               |                              |
| SNV      | TCF20   |                 |            | uc003bck.1 | P     | L          | 467  | SLSALSTQVANLPNTV<br>QHMLLSDAL  | SLSALSTQVANLLNTVQH<br>MLLSDAL  |                               |                              |
| SNV      | AGAP1   |                 |            | uc002vvt.3 | P     | S          | 632  | GNSHCVDCEQNP<br>WASLNLGALMC    | GNSHCVDCEQNSNWA<br>SLNLGALMC   |                               |                              |

|          |         |          |            |            |        |            |      |                                     |                                       |
|----------|---------|----------|------------|------------|--------|------------|------|-------------------------------------|---------------------------------------|
|          |         | SNV      | TMEM2      | uc011lsa.1 | N      | S          | 122  | DENCPDQNPRLRNW<br>DPGQDSAKQVV       | DENCPDQNPRLRSWDP<br>GQDSAKQVV         |
|          |         | SNV      | SORCS1     | uc021pxw.1 | E      | K          | 301  | AYSQDQKLYSSAEFGR<br>RWQLIQEGV       | AYSQDQKLYSSAKFGRR<br>WQLIQEGV         |
|          |         | SNV      | CHST14     | uc001zlw.3 | E      | V          | 270  | VTFPEFLRYLVDDEPER<br>MNEHWMPV       | VTFPEFLRYLVDVDPERM<br>NEHWMPV         |
|          |         | SNV      | VPS13C     | uc002ahc.2 | L      | F          | 74   | IDKLTLPKIPWKNLYGEA<br>VVATLEGL      | IDKLTLPKIPWKNFYGEAV<br>VATLEGL        |
| NCI-3903 | TMG7    | SNV      | NDRG2      | uc010tll.2 | S      | F          | 338  | SRSRTASLTSAAASVDG<br>NRSRRTLS       | SRSRTASLTSAAAFVDGNR<br>SRSRRTLS       |
|          |         | SNV      | SLC25A22   | uc009yci.3 | P      | S          | 281  | LDCARKILRHGSPSAFL<br>KGAYCRAL       | LDCARKILRHGSSAFLKG<br>AYCRAL          |
|          |         | SNV      | SLC27A4    | uc004but.3 | G      | S          | 180  | CLTTSRARALVFGSEM<br>ASAICEVHA       | CLTTSRARALVFSSEMAS<br>AICEVHA         |
|          |         | SNV      | IFNGR1     | uc011edm.1 | P      | S          | 328  | LEKEVVCEEPLSPATVP<br>GMHTEDNP       | LEKEVVCEEPLSSATVPG<br>MHTEDNP         |
|          |         | SNV      | CPS1       | uc010fus.3 | G      | S          | 731  | LSRSSALASKATGYPLA<br>FIAAKIAL       | LSRSSALASKATSYPLAFIA<br>AKIAL         |
|          |         | SNV      | CSGALNACT2 | uc001jan.4 | H      | Y          | 304  | FRDVCIHQDKKIHLTV<br>VYFGKEGLS       | FRDVCIHQDKKIYLVVYF<br>GKEGLS          |
|          |         | SNV      | ZNF263     | uc010uww.2 | P      | S          | 630  | LIRHQRIHTGEKPYTCH<br>ECGDSFSH       | LIRHQRIHTGEKSYTCHEC<br>GDSFSH         |
|          |         | SNV      | ANKRD27    | uc002ntn.1 | E      | K          | 412  | CLFKHIASGNQKEVER<br>LLSQEDHDK       | CLFKHIASGNQKKVERLLS<br>QEDHDK         |
|          |         | SNV      | BCL9L      | uc009zal.3 | P      | S          | 963  | NLKSPQTPSQMVPLPS<br>ANPPGPLKS       | NLKSPQTPSQMVSLPSA<br>NPPGPLKS         |
|          |         | SNV      | ADCY9      | uc002cvx.3 | H      | Y          | 292  | ELLSRGLLHGCIHAIGV<br>HLFVMSQV       | ELLSRGLLHGCIYAIGVHL<br>FVMSQV         |
|          |         | SNV      | LONRF2     | uc002tal.4 | R      | K          | 566  | LHVFEPRYRLMIRRCM<br>ETGTRKFGM       | LHVFEPRYRLMIKRCMET<br>GTRKFGM         |
|          |         | SNV      | LONRF2     | uc002tal.4 | N      | I          | 323  | EVLFSATANVHENLTS<br>SIQSRLKAQ       | EVLFSATANVHEILTSSIQ<br>SRLKAQ         |
|          |         | NCI-3903 | TMG8       | SNV        | DNAH14 | uc001how.2 | L    | F                                   | 3052                                  |
| SNV      | VPS13B  |          |            | uc003yiv.4 | IP     | MS         | 3284 | KDIPKFEVYCKKIPSECS<br>IHHELYH       | KDIPKFEVYCKKMSSECSI<br>HHELYH         |
| SNV      | PIAS4   |          |            | uc002lzg.3 | S      | F          | 222  | PNIAVKVNHSYCSVPG<br>YYPNSKPGV       | PNIAVKVNHSYCFVPGY<br>PSNKPGV          |
| SNV      | SLC5A4  |          |            | uc003ami.3 | E      | K          | 139  | TMPEYLKRFGGGERLQ<br>VYLSILSLF       | TMPEYLKRFGGKRLQVY<br>LSILSLF          |
| SNV      | LRRC42  |          |            | uc001cwk.2 | G      | D          | 132  | SAAEARQKFTEPGAGL<br>RALQKFTEA       | SAAEARQKFTEPDAGLRA<br>LQKFTEA         |
| SNV      | PHKA1   |          |            | uc011mqi.2 | P      | L          | 34   | ILCHQNPVTGLLPASY<br>DQKDAWVRD       | ILCHQNPVTGLLLASYDQ<br>KDAWVRD         |
| SNV      | GPSM2   |          |            | uc010ove.1 | A      | T          | 682  | ALLEFKNSGKKSADH<br>GASSHQPRVPLFPENG | ALLEFKNSGKKSTDH<br>GASSHQPRVPLFSENGLH |
| SNV      | N4BP1   |          |            | uc002efp.3 | P      | S          | 522  | LHQQPEPLL                           | QHQPEPLL                              |
| SNV      | FASTKD3 |          |            | uc011cmp.2 | P      | L          | 598  | DIHKRIALCIDGPKRFC<br>SNSKHLLG       | DIHKRIALCIDGLKRFCSN<br>SKHLLG         |
| SNV      | ARAP3   |          |            | uc003llo.1 | S      | F          | 280  | TSDDLISPYASFSFTAD<br>RLTPLLSG       | TSDDLISPYASFFFTADRL<br>TPLLSG         |
| SNV      | ASH1L   |          |            | uc009wqr.1 | M      | I          | 534  | QPPVYCTSPDFKMGG<br>ASDVSTAKSP       | QPPVYCTSPDFKIGGASD<br>VSTAKSP         |
| SNV      | ZXDC    |          |            | uc003eix.2 | P      | L          | 494  | LLPQLEAPSSLTPSSELS<br>SPGQSEL       | LLPQLEAPSSLTSSSELSSP<br>GQSEL         |
| NCI-3903 | TMG9    |          |            | SNV        | CABIN1 | uc021wnc.1 | R    | C                                   | 1783                                  |

|          |          |          |         |            |        |            |      |                                      |                                         |
|----------|----------|----------|---------|------------|--------|------------|------|--------------------------------------|-----------------------------------------|
|          |          | SNV      | KIF1BP  | uc001joy.3 | P      | S          | 246  | TLKRQLEHNAYHPIEW<br>AINAATLSQ        | TLKRQLEHNAYHSIEWAI<br>NAATLSQ           |
|          |          | SNV      | CASD1   | uc003unj.4 | S      | L          | 647  | FSNKISNLLFISVVSFL<br>TYSIWAS         | FSNKISNLLFILVVSFLTYS<br>IWAS            |
|          |          | SNV      | RAPGEF6 | uc010jdk.3 | S      | G          | 94   | VLVKGSMVLPPCSFGK<br>QFGGKRGCD        | VLVKGSMVLPPCGFGKQ<br>FGGKRGCD           |
|          |          | SNV      | FMN2    | uc010pyf.1 | K      | Q          | 1417 | NRAQSDELEKIEKHGR<br>SSKDKENAK        | NRAQSDELEKIEQHGRSS<br>KDKENAK           |
|          |          | SNV      | EXOC6   | uc010qnr.2 | S      | F          | 284  | EEILTVQDLVDFSPVYR<br>CLHIYSVL        | EEILTVQDLVDFFPVYRCL<br>HIYSVL           |
|          |          | SNV      | DOCK9   | uc021rlw.1 | P      | S          | 1824 | GKEYIYKEPKLTPLEIS<br>QRLLKLY         | GKEYIYKEPKLTLSEISQR<br>LLKLY            |
|          |          | SNV      | HEG1    | uc011bke.2 | S      | F          | 400  | TGNPGDEEFIEPSTENE<br>FGLTSLRW        | TGNPGDEEFIEPFTENEF<br>GLTSLRW           |
|          |          | SNV      | HDAC4   | uc010fyy.3 | S      | F          | 861  | QAFYSDPSVLYMSLHR<br>YDDGNFFPG        | QAFYSDPSVLYMFLHRYD<br>DGNFFPG           |
|          |          | SNV      | BRAF    | uc003vwc.4 | V      | E          | 600  | LTVKIGDFGLATVKSR<br>WSGSHQFEQ        | LTVKIGDFGLATEKSRWS<br>GSHQFEQ           |
|          |          | SNV      | LINS1   | uc002bwi.3 | S      | F          | 46   | PAVSDQDCSTATSLE<br>WANTCGIQGR        | PAVSDQDCSTATFLEWA<br>NTCGIQGR           |
|          |          | SNV      | ZNF550  | uc031rnf.1 | A      | V          | 9    | DAAQMLVTFKDVAVT<br>FTREEWRQLD        | DAAQMLVTFKDVVVVTF<br>REEWRQLD           |
| NCI-3903 | TMG10    | SNV      | KLHL36  | uc002fig.3 | A      | V          | 363  | GGFSFRDNGGDAASN<br>LLRYDPRCK         | GGFSFRDNGGDAVSNLL<br>YRYDPRCK           |
|          |          | SNV      | ALKBH4  | uc003uzl.3 | E      | K          | 37   | ICERQRGSDPPWELPP<br>AKTYRFIYC        | ICERQRGSDPPWKLPPAK<br>TYRFIYC           |
|          |          | SNV      | BCAR3   | uc001dqb.4 | S      | F          | 32   | PLASSMDLLSSRSPLAE<br>HRPDAYQD        | PLASSMDLLSSRFPLAEH<br>RPDAYQD           |
|          |          | SNV      | KATNAL1 | uc001ust.4 | R      | W          | 56   | RDPAIKGKWQQVRQE<br>LLEEYEQVKS        | RDPAIKGKWQQVWQEL<br>LEEYEQVKS           |
|          |          | SNV      | CP110   | uc002dgl.4 | G      | R          | 765  | FVSANEAPFYLWGSST<br>SGLTKLSVT        | FVSANEAPFYLWRSSTSG<br>LTKLSVT           |
|          |          | SNV      | C6orf70 | uc011ehb.1 | R      | C          | 502  | MPENRCVLKDLDRLPT<br>ETWPQLLRE        | MPENRCVLKDLDCLPET<br>WPQLLRE            |
|          |          | SNV      | LMF1    | uc021tae.1 | E      | K          | 356  | LQMQRDIRGARPEPR<br>FGSVVRAAN         | LQMQRDIRGARPKPRFG<br>SVVRAAN            |
|          |          | SNV      | DEPDC6  | uc003yow.4 | H      | Y          | 99   | KLMQKLADRGIHHVC<br>DEHKEFKDV         | KLMQKLADRGIYHVCDE<br>HKEFKDV            |
|          |          | SNV      | GMEB1   | uc001brb.3 | G      | R          | 79   | AVETHTHIKIEEGIDTG<br>TIEANEDM        | AVETHTHIKIEERIDTGIE<br>ANEDM            |
|          |          | SNV      | VPS13A  | uc004aks.3 | P      | L          | 2313 | SSFNITRIVTFTPFIYMIK<br>NKSKEYHI      | SSFNITRIVTFTLFYMIKKN<br>SKYHI           |
|          |          | SNV      | ZNF142  | uc010fvt.4 | H      | Y          | 185  | KKRTHLVEHLHLHFPD<br>PSLQCPNCQ        | KKRTHLVEHLHLHFPDPSL<br>QCPNCQ           |
|          |          | SNV      | PALLD   | uc011cjx.2 | E      | K          | 941  | HFLQAPGDLTVQEGKL<br>CRMDCKVSG        | HFLQAPGDLTVQKGKLC<br>RMDCKVSG           |
|          |          | NCI-3903 | TMG11   | SNV        | SH3TC1 | uc003gkw.4 | P    | S                                    | 762                                     |
| SNV      | TMEM132A |          |         | uc001nqj.3 | R      | G          | 1018 | LKDPEELRNYMERIRG<br>SS               | LKDPEELRNYMEGIRGSS                      |
| SNV      | TNRC6C   |          |         | uc002juf.2 | P      | S          | 1298 | SVKDPSQSQSRLPQW<br>THPNMNDLNP        | SVKDPSQSQSRLSQWTH<br>PNMNDLNP           |
| SNV      | RING1    |          |         | uc003odl.3 | G      | S          | 322  | QQEAGEPGGGGGAS<br>DTGGPDGCGG         | QQEAGEPGGGGGASDT<br>GGPDGCGG            |
| SNV      | OPTN     |          |         | uc001ily.1 | H      | Y          | 3    | MSHQPLSCLTEKEDS<br>INQLKIEGVEHLPRRVT | MSYQPLSCLTEKEDS<br>INQLKIEGVEHLSSRRVTNE |
| SNV      | ERCC4    |          |         | uc010bva.3 | P      | S          | 85   | NEITSNSR                             | ITSNSR                                  |
| SNV      | NICN1    |          |         | uc011bcr.2 | R      | C          | 63   | KNYYTAFLSIRVRQYTS                    | KNYYTAFLSIRVCQYSAH                      |

|          |       |     |          |            |   |   |          |                                |                                |
|----------|-------|-----|----------|------------|---|---|----------|--------------------------------|--------------------------------|
|          |       |     |          |            |   |   | AHTPAKWV | TPAKWV                         |                                |
|          |       | SNV | SGEF     | uc021xgc.1 | P | S | 648      | INSQLEFKIKPFPLVSSSR<br>RWLVKRG | INSQLEFKIKPFSLVSSSR<br>WLVKRG  |
|          |       | SNV | KIFC2    | uc003zcz.3 | E | K | 163      | RPPSPDGSTSQEESPS<br>HFTAVPGEP  | RPPSPDGSTSQEKSPSHF<br>TAVPGEP  |
|          |       | SNV | C4orf23  | uc003glg.2 | R | K | 159      | EGHPGRGIDVRRRRIW<br>DMYGPQTQL  | EGHPGRGIDVRRRRIWD<br>MYGPQTQL  |
|          |       | SNV | CUL9     | uc010jyk.3 | H | Y | 2069     | VHQAQAVPVRPDHCP<br>VCVSPLGCDD  | VHQAQAVPVRPDYCPVC<br>VSPLGCDD  |
|          |       | SNV | HOXA3    | uc011jzl.2 | P | L | 322      | ASYPASLPSCAPPPPP<br>QKRYTAAGA  | ASYPASLPSCAPLPPPPQK<br>RYTAAGA |
| NCI-3903 | TMG12 | SNV | FREM2    | uc001uwv.3 | P | S | 1185     | FSERQFFPIVIIPTNDE<br>QPEMFMRE  | FSERQFFPIVIISTNDEQPE<br>MFMRE  |
|          |       | SNV | FANCC    | uc022bkl.1 | A | T | 226      | ILQPEFFEAVNEAILLKK<br>ISLPSMA  | ILQPEFFEAVNETILLKKISL<br>PMSA  |
|          |       | SNV | CACNA2D1 | uc003uhr.1 | D | N | 662      | APRDYCNDLKISDNNT<br>EFLNLFNEF  | APRDYCNDLKISNNNTEF<br>LLNLFNEF |
|          |       | SNV | HEYL     | uc010oiw.2 | R | Q | 67       | RRDRINSSLELRRRLVP<br>TAFEKQGS  | RRDRINSSLELQRLVPTA<br>FEKQGS   |
|          |       | SNV | ZFP62    | uc021yjo.1 | L | F | 744      | VECGKSFYSYSSLSQHK<br>RIHTGEKP  | VECGKSFYSYSLFSQHKRI<br>HTGEKP  |
|          |       | SNV | ANKMY1   | uc010fzd.1 | P | L | 201      | ELDARIFLNEIPPFVED<br>GEPWFIIN  | ELDARIFLNEIPLFVEDGE<br>PWFIIN  |
|          |       | SNV | C16orf55 | uc031qxq.1 | S | F | 103      | TRASNETLVSCSSSGSD<br>QRTIREP   | TRASNETLVSCSFSGSDQ<br>QRTIREP  |
|          |       | SNV | ARHGAP39 | uc011llk.1 | M | I | 1032     | VFVQPANVAVTKMDV<br>SNLAMVMAPN  | VFVQPANVAVTKIDVSNL<br>AMVMAPN  |
|          |       | SNV | HIVEP1   | uc003nac.3 | R | Q | 2608     | RTESPQGLPTVQRENA<br>KKVLNPPAP  | RTESPQGLPTVQQENAK<br>KVLNPPAP  |
|          |       | SNV | ZNF653   | uc002mrz.2 | P | F | 501      | NLVHRKGKTKVCPHP<br>GCGKKFYLSN  | NLVHRKGKTKVCFHPGC<br>GKKFYLSN  |
|          |       | SNV | PCDHGB6  | uc003lkj.2 | L | F | 338      | GLSTQCKVIIIEILDEND<br>NSPEIIT  | GLSTQCKVIIEIFDENDNS<br>PEIIT   |
|          |       | SNV | AKD1     | uc003ptr.4 | R | K | 229      | QMVAEILHHLVQRPE<br>DYLENVENIV  | QMVAEILHHLVQKPEDYL<br>ENVENIV  |
| NCI-3903 | TMG13 | SNV | TNFAIP2  | uc001ymm.1 | E | K | 24       | PLEAGAAPYREEEEAA<br>KKKKEKKK   | PLEAGAAPYREEEAAKK<br>KKEKKK    |
|          |       | SNV | CEBPA    | uc002nun.3 | R | H | 264      | ALKGLGAAHPDLRASG<br>GSGAGAKK   | ALKGLGAAHPDLHASGG<br>SGAGAKK   |
|          |       | SNV | ANKDD1A  | uc010bha.3 | M | V | 205      | NTALHLAAGRGHMAV<br>LQRLVDIGLD  | NTALHLAAGRGHVAVLQ<br>RLVDIGLD  |
|          |       | SNV | C14orf79 | uc001ypy.1 | A | S | 66       | ISMPREGGSTCTARCP<br>DPGEHSSTW  | ISMPREGGSTCTSRCPDP<br>GEHSSTW  |
|          |       | SNV | PRICKLE1 | uc010skw.2 | E | K | 276      | QMTYDGQHWHEATEA<br>CFSCAQCKASL | QMTYDGQHWHEATEA<br>SCAQCKASL   |
|          |       | SNV | DNAH2    | uc002giu.1 | D | N | 2632     | SKVFQGMLRANKDFH<br>DTKSSITRLW  | SKVFQGMLRANKNFHDT<br>KSSITRLW  |
|          |       | SNV | CLSTN3   | uc001qss.3 | T | I | 313      | SERALRKLCGAATGEV<br>DLLPMPGPN  | SERALRKLCGAAIGEVDLL<br>PMPGPN  |
|          |       | SNV | ANKRD5   | uc010gbz.3 | S | L | 514      | AGDLASLKKAFESGIPV<br>DMKDNYYK  | AGDLASLKKAFELGIPVD<br>MKDNYYK  |
|          |       | SNV | CLIC6    | uc010gmt.1 | K | E | 514      | VIFNVTTVDLKRKPADL<br>QNLAPGTN  | VIFNVTTVDLKRKPADLQ<br>NLAPGTN  |
|          |       | SNV | FRY      | uc001utx.3 | R | C | 1143     | AGPFSIMFTPLDRYSD<br>RNHQITRYQ  | AGPFSIMFTPLDCYSDRN<br>HQITRYQ  |
|          |       | SNV | ANK3     | uc001jky.3 | P | S | 2141     | GFETRSEKTPSAPQSA<br>ESTGPKPLF  | GFETRSEKTPSASQSAEST<br>GPKPLF  |

|          |         |          |          |            |       |            |      |                                 |                                 |
|----------|---------|----------|----------|------------|-------|------------|------|---------------------------------|---------------------------------|
|          |         | SNV      | TBX19    | uc001gfl.3 | S     | F          | 141  | PNFGAHWMKAPISFS<br>KVKLTKNLNG   | PNFGAHWMKAPIFFSKV<br>KLTNLKNG   |
| NCI-3903 | TMG14   | SNV      | BTC      | uc003hig.2 | E     | K          | 159  | KRRKRKKKEEMETLG<br>KDITPINED    | KRRKRKKKEEMKTLGKD<br>ITPINED    |
|          |         | SNV      | SAMD9L   | uc022ahh.1 | T     | A          | 1255 | LLEYLNPNYKDATTME<br>SIVNEYAFL   | LLEYLNPNYKDAATMESI<br>VNEYAFL   |
|          |         | SNV      | KIAA0895 | uc003tfd.2 | G     | R          | 37   | RWKRWFKFRKRKGEK<br>RPRPNHKAVA   | RWKRWFKFRKRKREKRP<br>RPNHKAVA   |
|          |         | SNV      | GPR158   | uc001isk.3 | D     | N          | 713  | NSAWSEHSLDPEDIRD<br>ELKKLYAQL   | NSAWSEHSLDPENIRDEL<br>KKLYAQL   |
|          |         | SNV      | PCDHGA1  | uc011dan.2 | R     | C          | 293  | FHNVDHRVAQIFRLDS<br>YTGEISNKE   | FHNVDHRVAQIFCLDSYT<br>GEISNKE   |
|          |         | SNV      | SLC12A5  | uc010zxl.1 | P     | L          | 305  | IYAGVIKSAFDPPNFPI<br>CLLGNRTL   | IYAGVIKSAFDPLNFPICLL<br>GNRTL   |
|          |         | SNV      | PCLO     | uc003uhx.2 | P     | S          | 4870 | GIFPDPSKDMQVPTIE<br>KSHSSPGSS   | GIFPDPSKDMQVSTIEKS<br>HSSPGSS   |
|          |         | SNV      | RDH12    | uc001xjz.4 | R     | Q          | 95   | IRVDTKNSQVLVRKLD<br>LSDTKSIRA   | IRVDTKNSQVLVQKLDLS<br>DTKSIRA   |
|          |         | SNV      | PCDH18   | uc003ihg.4 | S     | L          | 777  | INGTLPIRSHHRSSPSS<br>SPTLERGQ   | INGTLPIRSHHRLSPSSPT<br>LERGQ    |
|          |         | SNV      | CETP     | uc002eki.2 | D     | N          | 297  | RVFHSLAKVAFQDGRLL<br>MLSLMGDEF  | RVFHSLAKVAFQNGRLM<br>LSLMGDEF   |
|          |         | SNV      | LGI2     | uc003grf.2 | E     | K          | 337  | KPNDIELFQIDDETFVVI<br>ADSSKAG   | KPNDIELFQIDDKTFFVIA<br>DSSKAG   |
|          |         | SNV      | MRAP2    | uc003pkg.4 | E     | K          | 26   | QSASNSDYTWWEYEEYE<br>IGPVSFEGFL | QSASNSDYTWWEYKYYEIG<br>PVSFEGFL |
|          |         | NCI-3903 | TMG15    | SNV        | TTN   | uc031rqd.1 | S    | N                               | 7616                            |
| SNV      | OLIG2   |          |          | uc021wil.1 | D     | G          | 97   | STSSAAASSTKKDKKQ<br>MTEPELQQL   | STSSAAASSTKKGKKQMT<br>EPELQQL   |
| SNV      | SAMD14  |          |          | uc002iqg.4 | T     | N          | 254  | TDSGKGSASSGTTSP<br>TCSPKHEGF    | TDSGKGSASSGNTSPTC<br>SPKHEGF    |
| SNV      | ILDR2   |          |          | uc001gdx.2 | G     | E          | 239  | DSCCCPQALYEAGKAA<br>KAGYPPSVS   | DSCCCPQALYEAKEAKAA<br>GYPPSVS   |
| SNV      | EFCAB5  |          |          | uc010wbj.2 | G     | R          | 325  | LQEFFQNPDFKLGSHC<br>KQLDITDST   | LQEFFQNPDFKLRSHCKQ<br>LDITDST   |
| SNV      | LRRC36  |          |          | uc010vjk.2 | E     | K          | 621  | LVRVLEENLILSEKIQQL<br>EEGAAIS   | LVRVLEENLILSKIQQL<br>GAAIS      |
| SNV      | GPC5    |          |          | uc010tif.2 | A     | T          | 137  | LFCSTYRNMALEAAAS<br>VQEFFTDVG   | LFCSTYRNMALETAASVQ<br>EFFTDVG   |
| SNV      | RP1     |          |          | uc003xsd.1 | E     | K          | 490  | KMIGQFSYSEERESGE<br>NKSEYHMFT   | KMIGQFSYSEERKSGENK<br>SEYHMFT   |
| SNV      | DNAH10  |          |          | uc001uft.4 | G     | E          | 2881 | GFLELINNMLTSGIVPA<br>LFSEEEKE   | GFLELINNMLTSEIVPALF<br>SEEEKE   |
| SNV      | APOB48R |          |          | uc002dqb.2 | A     | T          | 331  | AETASGGEEAGTASG<br>GEEAGIASGG   | AETASGGEEAGTSGGEE<br>AGIASGG    |
| SNV      | DNAH1   |          |          | uc011bef.2 | M     | V          | 1484 | DLVALVRGKLSRMQR<br>AVLSALIVIE   | DLVALVRGKLSRVQRAVL<br>SALIVIE   |
| SNV      | CFI     |          |          | uc011cft.2 | H     | Y          | 95   | PTYCQQKSLECLHPGT<br>KFLNNGTCT   | PTYCQQKSLECLYPGTKFL<br>NNGTCT   |
| NCI-3903 | TMG16   |          |          | SNV        | IL2RB | uc003aqv.1 | R    | H                               | 131                             |
|          |         | SNV      | RYR3     | uc010bar.3 | G     | R          | 4338 | QAAEMKAANEAEKGV<br>ESEKADMEDG   | QAAEMKAANEAEKRVES<br>EKADMEDG   |
|          |         | SNV      | FILIP1L  | uc021xbr.1 | V     | I          | 417  | RETLQSKDFKLEVEKLS<br>KRIMALEK   | RETLQSKDFKLEIEKLSKRI<br>MALEK   |
|          |         | SNV      | NXPH3    | uc002ipa.3 | R     | H          | 85   | GEAWGILGQPPNRPN<br>HSPPPSAKVK   | GEAWGILGQPPNHPNHS<br>PPPSAKVK   |

|          |          |          |          |             |        |            |      |                                |                                |                               |                               |
|----------|----------|----------|----------|-------------|--------|------------|------|--------------------------------|--------------------------------|-------------------------------|-------------------------------|
|          |          | SNV      | FAM171A1 | uc001iob.3  | H      | Y          | 398  | EAPGTKELMSGVHLE<br>MMSPGGEGDL  | EAPGTKELMSGVYLEMM<br>SPGGEGDL  |                               |                               |
|          |          | SNV      | MXRA5    | uc004crg.4  | S      | F          | 1260 | VSSRASGSKPSPSPENK<br>HRNIVTPS  | VSSRASGSKPSPFPENKH<br>RNIVTPS  |                               |                               |
|          |          | SNV      | CCDC116  | uc002zve.3  | D      | N          | 437  | SHFSNRLYEELADFLTQ<br>QAASLVIR  | SHFSNRLYEELANFLTQQ<br>AASLVIR  |                               |                               |
|          |          | SNV      | CA9      | uc003zxo.4  | E      | K          | 302  | EQLLSRLEEIAEEGSET<br>QVPGLDIS  | EQLLSRLEEIAEKGSETQV<br>PGLDIS  |                               |                               |
|          |          | SNV      | GRM8     | uc003vlt.2  | P      | S          | 573  | RPNMNRRTGCQLIPIIKL<br>EWHSPWAV | RPNMNRRTGCQLISIikle<br>WHSPWAV |                               |                               |
|          |          | SNV      | OLFML2B  | uc010pkq.2  | D      | N          | 525  | NEGAWMKDPLAKDE<br>RIYVTNYYGN   | NEGAWMKDPLAKNERIY<br>VTNYYGN   |                               |                               |
|          |          | SNV      | FGD3     | uc004ata.3  | R      | Q          | 256  | LKMYGEYVKNFDRAV<br>GLVSTWTQRS  | LKMYGEYVKNFDQAVGL<br>VSTWTQRS  |                               |                               |
|          |          | SNV      | TAS2R3   | uc003vwp.1  | P      | S          | 277  | AKMIGEVMTMFYPAG<br>HSFILIGNS   | AKMIGEVMTMFYSAGHS<br>FILILGNS  |                               |                               |
| NCI-3903 | TMG17    | SNV      | C12orf56 | uc021qzu.1  | D      | N          | 96   | LIDDYPEFLSSPDREISQ<br>HIRIIS   | LIDDYPEFLSSPNREISQHI<br>RIIIS  |                               |                               |
|          |          | SNV      | GPR98    | uc003kju.3  | G      | R          | 1589 | FTGACIPEIAEEGSTISC<br>VVERTRG  | FTGACIPEIAEERSTISCVV<br>ERTRG  |                               |                               |
|          |          | SNV      | KIAA1543 | uc002mgv.4  | R      | Q          | 762  | TGPKAASPSARRVPA<br>TRRSPGGPGP  | TGPKAASPSARQVQVTR<br>RSPGGPGP  |                               |                               |
|          |          | SNV      | KIAA1543 | uc002mgw.3  | A      | T          | 1072 | HNNLGVKRPTSRAPSP<br>SGLMSPSRL  | HNNLGVKRPTSRTPSPSG<br>LMSPSRL  |                               |                               |
|          |          | SNV      | ARHGEF4  | uc010fmw.1  | G      | R          | 570  | RPSAQRMGHLHYPGRG<br>SAISMVSLGS | RPSAQRMGHLHYPRRGS<br>ISMVSLGS  |                               |                               |
|          |          | SNV      | CNGA1    | uc003gxu.3  | R      | Q          | 629  | GSDPKDLEEKVTRME<br>GSVDLLQTRF  | GSDPKDLEEKVTQMEGS<br>VDLLQTRF  |                               |                               |
|          |          | SNV      | CNGA1    | uc003gxu.3  | I      | S          | 297  | FQRTETRTNYPNIFRIS<br>NLVMIYIVI | FQRTETRTNYPNSFRISNL<br>VMIYIVI |                               |                               |
|          |          | SNV      | GRIN3A   | uc004bbq.1  | R      | K          | 730  | SALNICYALLFGRTVAI<br>KPPKCWTG  | SALNICYALLFGKTVAIK<br>PKCWTG   |                               |                               |
|          |          | SNV      | PREX2    | uc011lez.1  | M      | R          | 218  | AVCSNINEAKRQMEKL<br>EVLEEWQSH  | AVCSNINEAKRQREKLEV<br>LEEWQSH  |                               |                               |
|          |          | SNV      | PREX2    | uc003xxu.1  | S      | F          | 954  | EFLLLPPLLGISQDGR<br>QHCIPEDL   | EFLLLPPLLGFQDGRQH<br>CIPEDL    |                               |                               |
|          |          | SNV      | TRIML2   | uc011cle.1  | G      | R          | 365  | ALRPVFLCIPNGDTSP<br>DSLILQH    | ALRPVFLCIPNRDTSPDS<br>LILQH    |                               |                               |
|          |          | SNV      | COL28A1  | uc003src.1  | P      | S          | 259  | PGDPGPPGTHGNP<br>KGERGPKGNP    | PGDPGPPGTHGNSGKIG<br>ERGPKGNP  |                               |                               |
|          |          | NCI-3903 | TMG18    | SNV         | SAMD12 | uc010mda.1 | G    | R                              | 123                            | LLRLTDKKLERMGIAQ<br>ENLRQHILQ | LLRLTDKKLERMRIAQEN<br>LRQHILQ |
|          |          |          |          | SNV         | VWDE   | uc003ssj.2 | D    | N                              | 411                            | VNEDFLWNNYIPDSIQ<br>IKVKDVPTA | VNEDFLWNNYIPNSIQIK<br>VKDVPTA |
| SNV      | ABCA12   |          |          | uc010zjn.2  | E      | K          | 1883 | SQVIYNLTGQRVENYLI<br>STANEFVQ  | SQVIYNLTGQRVKNYLIST<br>ANEFVQ  |                               |                               |
| SNV      | COL4A6   |          |          | uc011msn.2  | P      | L          | 548  | LGPSGPKGKKGEPILST<br>IQGMPGDR  | LGPSGPKGKKGELILSTIQ<br>GMPGDR  |                               |                               |
| SNV      | IL22RA1  |          |          | uc010oeg.1  | P      | L          | 512  | SSVQIEGHPMSLPLQP<br>PSRPCSPSD  | SSVQIEGHPMSLLLQPPS<br>RPCSPSD  |                               |                               |
| SNV      | ALPK3    |          |          | uc002ble.3  | P      | S          | 1073 | GLSQEVPTMPSLPGTG<br>LTASPKAGP  | GLSQEVPTMPSLPGTGLT<br>ASPKAGP  |                               |                               |
| SNV      | GJB7     |          |          | uc021zcyj.1 | D      | N          | 167  | IKCDLKPCPNTVDFIS<br>KPTKTIFF   | IKCDLKPCPNTVNCFISK<br>TEKTIFF  |                               |                               |
| SNV      | ISL1     |          |          | uc003jor.3  | G      | R          | 5    | MGDMGDPPKKRLIS<br>LC           | MGDMRDPPKKRLISLC               |                               |                               |
| SNV      | KIAA1324 |          |          | uc021orb.1  | P      | L          | 643  | QPYGVQACVPCGPGT<br>KNNKIHSCLY  | QPYGVQACVPCGLGTKN<br>NKIHSCLY  |                               |                               |
| SNV      | COL11A2  |          |          | uc003ocz.1  | P      | L          | 1440 | KGDRGLPGPQGSPPGQ               | KGDRGLPGPQGSGLGQKG             |                               |                               |

|          |         |          |          |                     |         |            | KGEMGIPGAS | EMGIPGAS                       |                                |
|----------|---------|----------|----------|---------------------|---------|------------|------------|--------------------------------|--------------------------------|
|          |         | SNV      | C3orf15  | uc011bje.2          | P       | S          | 255        | RAREKRAWEASLPALS<br>DTSQFEKRR  | RAREKRAWEASLSALSDT<br>SQFEKRR  |
|          |         | SNV      | NEFL     | uc003xee.4          | S       | L          | 63         | LSVRRSYSSSSGSLMPS<br>LENLDLSQ  | LSVRRSYSSSSGSLMPSLE<br>NLDLSQ  |
| NCI-3903 | TMG19   | SNV      | MMEL1    | uc001ajy.2          | R       | K          | 393        | QNLENIIDTYSARTIQN<br>YLVWRLVL  | QNLENIIDTYSAKTIQNYL<br>VWRLVL  |
|          |         | SNV      | DNAH5    | uc003jfd.2          | E       | K          | 1279       | QISIDFQVGPPIEESYALL<br>NRYGLLI | QISIDFQVGPPIEKSYALLN<br>RYGLLI |
|          |         | SNV      | MYO15A   | uc021trm.1          | G       | S          | 2147       | VWHNNHNAHNAERG<br>WLLLAACLSGFA | VWHNNHNAHNAERSWLL<br>LAACLSGFA |
|          |         | SNV      | FPR1     | uc021uyo.1          | G       | R          | 172        | VIIRVTTVPGKTGTVAC<br>TFNFSPWT  | VIIRVTTVPGKTRTVACTF<br>NFPDWT  |
|          |         | SNV      | DLEC1    | uc010hgv.1          | R       | Q          | 1125       | TRQLILTNRSPTRFSL<br>KFEYFGS    | TRQLILTNRSPIQTRFSLKF<br>EYFGS  |
|          |         | SNV      | KIAA1409 | ENST0000055<br>5664 | M       | I          | 1          | LNDDVLSTLPYTMISTL<br>ATFPPFLH  | LNDDILSTLPYTIISTLATFP<br>PFLH  |
|          |         | SNV      | CD3E     | uc010rya.2          | G       | S          | 29         | VGWVGQDGNEMMG<br>GITQTPYKVSIS  | VGWVGQDGNEMMSGIT<br>QTPYKVSIS  |
|          |         | SNV      | DCC      | uc010xdr.1          | S       | F          | 868        | THDAVRVSWADNSVP<br>KNQKTSEVRL  | THDAVRVSWADNFVPK<br>NQKTSEVRL  |
|          |         | SNV      | SCN2A    | uc021vry.1          | S       | N          | 1930       | RYLLKQKVKKVSIIYKK<br>DKGKECDG  | RYLLKQKVKKVSNIYKKDK<br>GKECDG  |
|          |         | SNV      | MAPT     | uc010dau.3          | G       | E          | 385        | QLKARMVSKSKDGTG<br>SDDKAKTST   | QLKARMVSKSKDETGSD<br>DKKAKTST  |
|          |         | SNV      | CXCR7    | uc021vys.1          | N       | S          | 62         | IYIFIVIGMIANSVVV<br>WVNIQAKT   | IYIFIVIGMIASSVVVVV<br>NIQAKT   |
|          |         | SNV      | CDH6     | uc003jhe.2          | D       | N          | 294        | PPGTPIGRIKASDADV<br>GENAEIEYS  | PPGTPIGRIKASNADVGE<br>NAEIEYS  |
|          |         | NCI-3903 | TMG20    | SNV                 | FAM133A | uc022bx.1  | G          | E                              | 128                            |
| SNV      | DNAH7   |          |          | uc002utj.4          | S       | F          | 3327       | PYANLCTWLPQKSWD<br>EICRLDDLPA  | PYANLCTWLPQKFWDEI<br>CRLDDLPA  |
| SNV      | DMBX1   |          |          | uc001cpx.3          | P       | L          | 338        | AAAAAHQGVWGSPLL<br>PAPPAGLAPA  | AAAAAHQGVWGSLLPA<br>PPAGLAPA   |
| SNV      | SLC4A10 |          |          | uc010zcs.2          | R       | Q          | 135        | EICWREGEDAEWRET<br>ARWLKFEEDV  | EICWREGEDAEWQETAR<br>WLKFEEDV  |
| SNV      | LRRIQ1  |          |          | uc021rbo.1          | D       | N          | 1269       | EPDSPDIPEKWMDSV<br>SSHSPLSKSA  | EPDSPDIPEKWMNSVSS<br>HSPLSKSA  |
| SNV      | KNDC1   |          |          | uc001llz.1          | P       | S          | 1600       | LSGLEHLAVRQSPA<br>RILPAKIAEV   | LSGLEHLAVRQSSAWRIL<br>PAKIAEV  |
| SNV      | HYDIN   |          |          | uc031qwy.1          | D       | N          | 4151       | EGWIPPLSRFPIDIFFTP<br>KQEGDVN  | EGWIPPLSRFPINIFFTPK<br>QEGDVN  |
| SNV      | MYH6    |          |          | uc001wju.3          | E       | K          | 1529       | QLGEGGKNVHELEKV<br>RKQLEVEKLE  | QLGEGGKNVHELKVKR<br>QLEVEKLE   |
| SNV      | COL29A1 |          |          | uc021xdz.1          | E       | K          | 2225       | LNSGRESFPVKTEDNG<br>SDYLVYLP   | LNSGRESFPVKTKDNGSD<br>YLVYLP   |
| SNV      | CSMD3   |          |          | uc011lhx.2          | K       | E          | 2209       | TSLYFHSDYSQNKQGF<br>HIVYQAYQL  | TSLYFHSDYSQNEQGFHI<br>VYQAYQL  |
| SNV      | PKHD1   |          |          | uc003pah.1          | P       | S          | 3449       | FVDVFSSVNIANPCSTS<br>GSVSTFYS  | FVDVFSSVNIANISCSTSGS<br>VSTFYS |
| SNV      | LRP1B   |          |          | uc010fnl.1          | S       | F          | 1102       | GTIRLCDHKTFCSCWS<br>TGRKINKAW  | GTIRLCDHKTFCFCWSTG<br>RCINKAW  |
| NCI-3903 | TMG21   |          |          | SNV                 | ZNF711  | uc011mqy.1 | P          | S                              | 517                            |
|          |         | SNV      | PRSS54   | uc002eng.3          | S       | F          | 36         | LYSSTSCGVQKASVYF<br>GPDPKLEGLV | LYSSTSCGVQKAFVYGP<br>DPKLEGLV  |

|          |         |          |          |            |        |             |      |                                     |                                      |                                |                               |
|----------|---------|----------|----------|------------|--------|-------------|------|-------------------------------------|--------------------------------------|--------------------------------|-------------------------------|
|          |         | SNV      | ABCC12   | uc002efc.1 | S      | L           | 631  | SDRQLYLLDDPLSAVD<br>AHVGKHFVE       | SDRQLYLLDDPLLAVDAH<br>VGKHFVE        |                                |                               |
|          |         | SNV      | ALB      | uc011cbf.2 | E      | K           | 165  | DNEETFLKKYLYEIARR<br>HPYFYAPE       | DNEETFLKKYLYKIARRHP<br>YFYAPE        |                                |                               |
|          |         | SNV      | ASGR2    | uc010clw.2 | S      | N           | 101  | LQAE LRSLKEAFSNFSS<br>STLTEVQA      | LQAE LRSLKEAFNNFSSST<br>LTEVQA       |                                |                               |
|          |         | SNV      | BANK1    | uc010ill.3 | P      | S           | 206  | TIPLAVVLPTEIPCENP<br>GEIFIILR       | TIPLAVVLPTEISCENPGEI<br>FIILR        |                                |                               |
|          |         | SNV      | BDKRB1   | uc021sbj.1 | R      | Q           | 176  | VGGLLSIPTFLLRSIQAV<br>PDLNITA       | VGGLLSIPTFLLQSIQAVP<br>DLNITA        |                                |                               |
|          |         | SNV      | BTBD11   | uc001tml.1 | A      | V           | 775  | SLEEILAEGTDLAETAP<br>PPLCASRN       | SLEEILAEGTDLVETAPP<br>LCASRN         |                                |                               |
|          |         | SNV      | C1orf100 | uc031psw.1 | R      | C           | 13   | MTAIRLREFIERRPVIP<br>PSIFIAHQ       | MTAIRLREFIERCPVIPPSI<br>FIAHQ        |                                |                               |
|          |         | SNV      | C6       | uc003jml.2 | E      | K           | 651  | EADSGCPQVPPEENG<br>FIRNEKQLYL       | EADSGCPQVPKNGFIR<br>NEKQLYL          |                                |                               |
|          |         | SNV      | C9orf79  | uc004app.4 | G      | E           | 896  | RVESVPKVPIFLGKRPQ<br>NGPGDNRT       | RVESVPKVPIFLEKRPQN<br>GPGDNRT        |                                |                               |
|          |         | SNV      | CACNA1E  | uc009wxt.3 | P      | L           | 2118 | TSTPRRSRRQLPPVPP<br>KPRPLLSYS       | TSTPRRSRRQLPLVPPKPR<br>PLLSYS        |                                |                               |
| NCI-3903 | TMG22   | SNV      | CACNA1I  | uc003ayf.3 | D      | N           | 250  | RCFLEENFTIQGDVALP<br>PYYQPEED       | RCFLEENFTIQGNVALPP<br>YYQPEED        |                                |                               |
|          |         | SNV      | CAPN9    | uc001hua.1 | H      | Y           | 132  | DQSFPGPYAGIFHFQF<br>WQHSEWLDV       | DQSFPGPYAGIFYFQFW<br>QHSEWLDV        |                                |                               |
|          |         | SNV      | CATSPERB | uc010aub.1 | S      | F           | 1114 | SISLSELIHRKSKSEE<br>NHDEDTWVECEDPFD | SISLSELIHRSKFEE<br>NHDEDTWVECEDSFDLR |                                |                               |
|          |         | SNV      | CD5L     | uc001frk.4 | P      | S           | 241  | LRLVGGDNLC                          | LVGGDNLC                             |                                |                               |
|          |         | SNV      | CDH12    | uc011cno.1 | A      | V           | 740  | PTAPPYDSLATYAYEGS<br>GSVAESLS       | PTAPPYDSLATYVYEGSG<br>SVAESLS        |                                |                               |
|          |         | SNV      | CHRM2    | uc022ame.1 | I      | K           | 301  | VSAVASNMRRDDEITQ<br>DENTVSTSLG      | VSAVASNMRRDDEKTQDE<br>NTVSTSLG       |                                |                               |
|          |         | SNV      | CNTN5    | uc021qpc.1 | G      | E           | 1068 | ASSQIRVPSYSGGKITS<br>AQSTLHSL       | ASSQIRVPSYSGEKITSAQ<br>STLHSL        |                                |                               |
|          |         | SNV      | CRP      | uc001ftx.1 | P      | S           | 30   | GQTDMSRKAFVFPKE<br>SDTSYVSLKA       | GQTDMSRKAFVFSKESD<br>TSYVSLKA        |                                |                               |
|          |         | SNV      | CSN3     | uc003hfe.4 | T      | I           | 133  | PPKKIQDKIIPTINTIAT<br>VEPTPA        | PPKKIQDKIIPIINTIATVE<br>PTPA         |                                |                               |
|          |         | SNV      | CTNNA2   | uc010ysj.2 | S      | L           | 939  | TRVRRGSQKKHISPVQ<br>ALSEFKAMD       | TRVRRGSQKKHILPVQAL<br>SEFKAMD        |                                |                               |
|          |         | SNV      | CYP4F2   | uc010xou.1 | D      | N           | 252  | LLHIDFLYLLTPDGQRF<br>RRACRLVH       | LLHIDFLYLLTPNGQRFRR<br>ACRLVH        |                                |                               |
|          |         | SNV      | CYP4F22  | uc002nbh.4 | G      | R           | 290  | VIQERRRALRQQGAEA<br>WLKAKQGKT       | VIQERRRALRQQRAEAW<br>LKAKQGKT        |                                |                               |
|          |         | NCI-3903 | TMG23    | SNV        | GPRIN2 | uc021pNCI-1 | R    | Q                                   | 110                                  | VSTMGGSDLCRLRAPSA<br>AAAMQRSHS | VSTMGGSDLCRLQAPSA<br>AAMQRSHS |
|          |         |          |          | SNV        | DAOA   | uc001vqb.3  | F    | C                                   | 28                                   | SRYTLGKIYFIGFQRSIL<br>LSKSENS  | SRYTLGKIYFIGCQRSILLS<br>KSENS |
| SNV      | DNAH8   |          |          | uc021yzh.1 | D      | N           | 1019 | FQKYKTLWTEDRDVK<br>VKEFLANNPS       | FQKYKTLWTEDRNVKVK<br>EFLANNPS        |                                |                               |
| SNV      | DNAH8   |          |          | uc021yzh.1 | E      | K           | 4381 | KGWALDVTIHNVEVLR<br>QTKEEITSP       | KGWALDVTIHNKVLRLQ<br>TKEEITSP        |                                |                               |
| SNV      | FAM170A |          |          | uc003ksm.2 | H      | Y           | 323  | RRSWSQCPGCVFHSP<br>KDRNS            | RRSWSQCPGCVFYS PKD<br>RNS            |                                |                               |
| SNV      | FGA     |          |          | uc003iod.1 | G      | E           | 824  | CQAANLNGIYYPGGSY<br>DPRNNSPYE       | CQAANLNGIYYPEGSYDP<br>RNNSPYE        |                                |                               |
| SNV      | FKSG83  |          |          |            | P      | S           | 164  | RLTCAILNMIISCLPHS<br>FLLHQRN        | RLTCAILNMIISCLPHSFL<br>LHQRN         |                                |                               |
| SNV      | GADL1   |          |          | uc003cep.2 | G      | R           | 488  | KGSLMLGYQPHRGKV<br>NFFRQVVISP       | KGSLMLGYQPHRRKVN<br>FRQVVISP         |                                |                               |



|          |         |                |           |             |        |            |      |                                |                                |
|----------|---------|----------------|-----------|-------------|--------|------------|------|--------------------------------|--------------------------------|
|          |         | SNV            | GLYATL2   | uc009ymq.3  | D      | N          | 198  | ERSLKYIERCLQDFLGF<br>GVLGPEGQ  | ERSLKYIERCLQNFLGFGV<br>LGPEGQ  |
|          |         | SNV            | GPRIN2    | uc021pNCI-1 | R      | Q          | 110  | VSTMGGSDLCRLRAPSA<br>AAAMQRSHS | VSTMGGSDLCRLQAPSA<br>AAMQRSHS  |
|          |         | SNV            | GRHL2     | uc010mbu.3  | H      | Y          | 407  | TYSYNNRSNKPIHRA<br>CQIKVFCDK   | TYSYNNRSNKPIYRAYCQI<br>KVFCDK  |
|          |         | FS<br>deletion | GZMA      | uc003jpm.3  |        |            | 248  | DPRGPGVYILLSKKHLN<br>WIIMTIKG  | DPRGPGVYILLSKNTSTG             |
| NCI-3903 | TMG24   | SNV            | KANK4     | uc001dah.4  | A      | T          | 228  | GYPELASAIKQPASKLS<br>SIQSLLS   | GYPELASAIKQPTSKLSSI<br>QSLLS   |
|          |         | SNV            | KANK4     | uc001dah.4  | V      | D          | 228  | SSPRASTRIPELVQEGA<br>EPPEGVVK  | SSPRASTRIPELDQEGAEP<br>PEGVVK  |
|          |         | SNV            | KIAA0748  | uc001sgn.4  | P      | F          | 389  | APSQTLDSNPKVPCCT<br>HSLPIEDPQ  | APSQTLDSNPKVFCCTHS<br>LPIEDPQ  |
|          |         | SNV            | KIAA2022  | uc004eby.3  | E      | K          | 1343 | QRFMMASIEPLWEP<br>MEHHGDPNIFY  | QRFMMASIEPLWKPME<br>HHGDPNIFY  |
|          |         | SNV            | KL        | uc001uus.3  | E      | K          | 897  | QLRVYYMQNYINEALK<br>AHILDGINL  | QLRVYYMQNYINKALKA<br>HILDGINL  |
|          |         | SNV            | KRT38     | uc002hwq.1  | R      | K          | 21   | SCPLGCTMAPGARNV<br>SVSPIDIGCQ  | SCPLGCTMAPGAKNVSV<br>SPIDIGCQ  |
|          |         | SNV            | KRT77     | uc009zmi.3  | A      | V          | 353  | QYELIAQRSKDEAEALY<br>QTKYQELQ  | QYELIAQRSKDEVEALYQ<br>TKYQELQ  |
|          |         | SNV            | KRTAP20-2 | uc011adg.2  | G      | R          | 57   | GYGYGCCRPSCYGRY<br>WSCGFY      | GYGYGCCRPSCYRRYWS<br>CGFY      |
|          |         | SNV            | LALBA     | uc001rrt.3  | R      | K          | 89   | KLWCKSSQVQSRNIC<br>DISCDKFLD   | KLWCKSSQVQSKNICDI<br>SCDKFLD   |
|          |         | SNV            | MAB21L2   |             | N      | T          | 209  | PNRVAEVKAEGFNLLS<br>KECYSLTGK  | PNRVAEVKAEGFTLLSKE<br>CYSLTGK  |
|          |         | SNV            | MAB21L2   | uc003ilw.3  | E      | K          | 58   | EVQEPFRFISLSLEIDARY<br>EGLEVIS | EVQEPFRFISLSKIDARYE<br>GLEVIS  |
|          |         | SNV            | MGC26647  | uc022ahc.1  | R      | K          | 235  | FMDPATFINMYNRPIH<br>ITLDSEVVW  | FMDPATFINMYNKPIHIT<br>LDSEVVW  |
|          |         | NCI-3903       | TMG25     | SNV         | MNDA   | uc001fsz.1 | E    | K                              | 282                            |
| SNV      | MOV10L1 |                |           | uc011arq.1  | G      | R          | 403  | LSRKQMTPEPEPGLVLP<br>PGGKTFIVV | LSRKQMTPEPEPGRVPPG<br>GKTFIVV  |
| SNV      | MUC15   |                |           | uc001mqx.3  | R      | Q          | 284  | RRLYDDRNEPVLRLDN<br>APEPYDVSF  | RRLYDDRNEPVLQLDNA<br>PEPYDVSF  |
| SNV      | MUC16   |                |           | uc002mkp.3  | S      | F          | 8189 | ETSTETITRLPTSSIMTE<br>SAEMMIK  | ETSTETITRLPTFSIMTESA<br>EMMIK  |
| SNV      | MUC16   |                |           | uc002mkp.3  | P      | S          | 1490 | SPSSPMSTFAIFPPMST<br>PSHELKSKS | SPSSPMSTFAIFSPMSTPS<br>HELKSKS |
| SNV      | MUC21   |                |           | uc021yuf.1  | G      | E          | 532  | HGLNHGLGPGPGGN<br>HGAPHRPRWSP  | HGLNHGLGPGPGENHG<br>APHRPRWSP  |
| SNV      | MYH8    |                |           | uc002gmm.2  | L      | V          | 1304 | RQLDEKDALVSQLSRS<br>KQASTQQIE  | RQLDEKDALVSQVSRKQ<br>ASTQQIE   |
| SNV      | NEUROD6 |                |           | uc022abi.1  | G      | R          | 269  | EGPLSPPPINYNGIFSL<br>KQEETLDY  | EGPLSPPPINYNRIFSLKQ<br>EETLDY  |
| SNV      | NLRP13  |                |           | uc010ygg.2  | E      | K          | 147  | QGCQDPNQEELDELE<br>EETGNVQAQG  | QGCQDPNQEELDKLEE<br>TGNVQAQG   |
| SNV      | NWD1    |                |           | uc002nev.4  | G      | E          | 474  | VHLILSACSGALGVLDL<br>LQRVLLDP  | VHLILSACSGALEVLDLQ<br>RVLLDP   |
| SNV      | OR10J3  |                |           | uc010piu.2  | P      | F          | 80   | SISETCYTVAIIPHMLS<br>GLLNPHQP  | SISETCYTVAIIFHMLSGLL<br>NPHQP  |
| SNV      | OR51G2  |                |           | uc001lzt.1  | L      | F          | 115  | FAQLFFIHCFSFLESSVL<br>LSMAFDR  | FAQLFFIHCFSFLESSVLLS<br>MAFDR  |
| NCI-3903 | TMG26   |                |           | SNV         | OR56B1 | uc009yev.1 | A    | T                              | 173                            |

|  |                |          |                     |   |   |      |                                     |                                      |
|--|----------------|----------|---------------------|---|---|------|-------------------------------------|--------------------------------------|
|  | SNV            | OR5D16   | uc010rio.2          | A | V | 127  | ILFAVMAYDHFVAICN<br>PLLYTVAIS       | ILFAVMAYDHFVVICNPL<br>LYTVAIS        |
|  | SNV            | OR9K2    | uc010spe.2          | S | F | 173  | MSTRCTQLVAGSYFC<br>GCISSVIQT        | MSTRCTQLVAGFYFCGC<br>ISSVIQT         |
|  | SNV            | PCDHA6   | uc011dab.2          | G | R | 193  | DVKINSDDNKQIGLLK<br>KSLDREEA        | DVKINSDDNKQIRLLKKS<br>LDREEA         |
|  | SNV            | PCDHAC1  | uc003lih.2          | V | A | 435  | PPLSTRRTITVSVADVN<br>DNTPNFPQ       | PPLSTRRTITVSAADVND<br>NTPNFPQ        |
|  | SNV            | PDE1A    | uc010zfq.2          | S | F | 403  | QGDKEAELGLPFSPLC<br>DRKSTMVAQ       | QGDKEAELGLPFFPLCDR<br>KSTMVAQ        |
|  | SNV            | PDYN     | uc021vzu.1          | D | N | 243  | RRQFKVTRSQEDPN<br>AYSGLFDA          | RRQFKVTRSQENPNAY<br>SGLFDA           |
|  | SNV            | PEG3     | uc010etr.2          | S | F | 1313 | VTVHKNEPEYEGSSYT<br>HTSFLTEPL       | VTVHKNEPEYEGFSYHT<br>SFLTEPL         |
|  | SNV            | PIK3C2G  | uc010sic.2          | E | K | 703  | LPLVLGSAPGWDERTV<br>SEMHTILRR       | LPLVLGSAPGWDKRTVSE<br>MHTILRR        |
|  | SNV            | PLCZ1    | ENST0000054<br>1695 | P | S | 402  | IKKNGQGNMVIIPA<br>QIVLVLKAKVQCELNIT | IKKNGQGNMVIISA<br>QIVLVLKAKVQCKLNITA |
|  | SNV            | PTH2R    | uc010zjb.2          | E | K | 49   | AQLQEGEG                            | QLQEGEG                              |
|  | FS<br>deletion | TMEM132D | uc009zyl.1          |   |   | 577  | GRGCTLQYQHAMVR<br>VLTQFVAEAG        | GRGCTLQYQHAMVGS                      |

| Patient ID | TMG# | Mutation Type | Gene                | Transcript ID       | WT AA   | Mut AA     | AA position | Wild-type 25-mer              | Mutated 25-mer                |
|------------|------|---------------|---------------------|---------------------|---------|------------|-------------|-------------------------------|-------------------------------|
| NCI-3926   | TMG1 | SNV           | FAM86C1             | uc009ysr.3          | A       | S          | 7           | MAPEENAGSELLQSF<br>KRR        | MAPEENAGSELLQSF<br>R          |
|            |      | SNV           | ENSG00000228<br>532 | ENST000004<br>49327 | I       | N          | 18          | PKEGVKTENNDHINLK<br>VAGQDGSVV | PKEGVKTENNDHINLK<br>AGQDGSVV  |
|            |      | SNV           | ENSG00000153<br>230 | ENST000002<br>83225 | S       | F          | 237         | RISQRQRQSKAFSNCV<br>PHLIVVTVF | RISQRQRQSKAFFNCVPH<br>LIVVTVF |
|            |      | SNV           | FAM5C               | uc010pot.1          | S       | N          | 159         | DYLQERFVQAALSYIA<br>CNSEGEFIC | DYLQERFVQAALNYIACN<br>SEGEFIC |
|            |      | SNV           | LOC440295           | uc002bhl.2          | R       | C          | 204         | QEERLREQEERLREQE<br>ERLHEQEER | QEERLREQEERLCEQEER<br>LHEQEER |
|            |      | SNV           | MRC1                | uc001ipk.4          | S       | F          | 1046        | GKGYPGGRRSSLSYED<br>ADCVVIIGG | GKGYPGGRRSSLFYEDAD<br>CVVIIGG |
|            |      | SNV           | OR11H2              | uc021rno.1          | L       | F          | 177         | VCGFLWFLIPIVLISQK<br>PFCGNII  | VCGFLWFLIPIVVISQKPF<br>CGPNII |
|            |      | SNV           | OR11H2              | uc021rno.1          | L       | F          | 177         | VCGFLWFLIPIVLISQM<br>PFCGNII  | VCGFLWFLIPIVVISQMPF<br>CGPNII |
|            |      | SNV           | TCRBV9S1A1T         | uc003vxf.3          | A       | V          | 91          | VPNRFSPKSPDKAHLN<br>LHINSLELG | VPNRFSPKSPDKVHLNLH<br>INSLELG |
|            |      | SNV           | ENSG00000211<br>941 | ENST000003<br>90601 | S       | N          | 54          | AASGFTFSDYYMSWIR<br>QAPGKGLEW | AASGFTFSDYYMNWIRQ<br>APGKGLEW |
|            |      | SNV           | ENSG00000211<br>941 | ENST000003<br>90601 | I       | V          | 56          | SGFTFSDYYMSWIRQA<br>PGKGLEWVS | SGFTFSDYYMSWVRQAP<br>GKGLEWVS |
|            |      | SNV           | DUX2                | uc031sid.1          | A       | P          | 240         | GVSQPAPARGDFAYA<br>APAPDGALS  | GVSQPAPARGDFPYAAP<br>APPDGALS |
|            |      | NCI-3926      | TMG2                | SNV                 | TRIM49B | uc021qix.1 | L           | F                             | 49                            |

|          |       |                  |           |            |        |            |      |                                |                                |                               |                               |
|----------|-------|------------------|-----------|------------|--------|------------|------|--------------------------------|--------------------------------|-------------------------------|-------------------------------|
|          |       | SNV              | USP17L17  | uc031sdl.1 | G      | E          | 86   | RPAAVGAGLQNMGN<br>TCYVNASLQCL  | RPAAVGAGLQNMMENTC<br>YVNASLQCL |                               |                               |
|          |       | SNV              | AK9       | uc003ptr.4 | S      | L          | 367  | YSVSFLGKIYCLSSEAL<br>KPFLLNP   | YSVSFLGKIYCLLSEALKP<br>FLLNP   |                               |                               |
|          |       | SNV              | RPL19     | uc002hrq.1 | A      | G          | 169  | DQAEARRSKTKEARKR<br>REERLQAKK  | DQAEARRSKTKEGRKRRE<br>ERLQAKK  |                               |                               |
|          |       | SNV              | NES       | uc001fpq.3 | G      | D          | 205  | YQERVAHMETS LGQA<br>RERLGRAVQG | YQERVAHMETS LDQARE<br>RLGRAVQG |                               |                               |
|          |       | SNV              | COL11A1   | uc009weh.3 | G      | E          | 1274 | GAKGEAGAEGPPGKT<br>GPVGPQGPAG  | GAKGEAGAEGPPEKTGP<br>VGPQGPAG  |                               |                               |
|          |       | SNV              | PI15      | uc003yam.3 | N      | K          | 75   | SQNDMIAILDYHNQV<br>RGKVFPPAAN  | SQNDMIAILDYHKQVRG<br>KVFPAAAN  |                               |                               |
|          |       | SNV              | ATF5      | uc010enq.2 | S      | P          | 126  | DFFLDAPPLPPSPPL<br>PPPLPPA     | DFFLDAPPLPPPPPLPP<br>PLPPA     |                               |                               |
|          |       | SNV              | L1CAM     | uc031tks.1 | P      | S          | 372  | PQPEVTWRINGIPVEE<br>LAKDQKYRI  | PQPEVTWRINGISVEELA<br>KDQKYRI  |                               |                               |
|          |       | SNV              | MSH2      | uc002rvz.4 | G      | E          | 902  | LILLTWKRKL RGGKRSA<br>CSRPERQN | LILLTWKRKL RGEKRSACS<br>RPERQN |                               |                               |
|          |       | SNV              | MET       | uc011kna.1 | P      | S          | 518  | TGKKVSCSHREFP                  | TGKKVSCSHREFS                  |                               |                               |
|          |       | SNV              | CRELD2    | uc031ryb.1 | R      | P          | 85   | WIDSQDRPLRFLRPSA<br>VRTGLSDSY  | WIDSQDRPLRFLPPSAVR<br>TGLSDSY  |                               |                               |
| NCI-3926 | TMG3  | SNV              | PAM       | uc011cuz.2 | V      | A          | 56   | PPTRLPKGVGFRVGGE<br>TGSKYFVLQ  | PPTRLPKGVGFRAGGETG<br>SKYFVLQ  |                               |                               |
|          |       | SNV              | DROSHA    | uc003jhi.2 | P      | L          | 922  | NIMSRLGQDDPTPSRI<br>NHNERLEFL  | NIMSRLGQDDPTLSRINH<br>NERLEFL  |                               |                               |
|          |       | SNV              | YTHDF2    | uc021okf.1 | G      | E          | 360  | PTRWVAPRNRGSGFG<br>HNGVDGNGVG  | PTRWVAPRNRGSEFGHN<br>GVDGNGVG  |                               |                               |
|          |       | SNV              | PARP4     | uc001upl.3 | Q      | R          | 1059 | CSPSCHSVSVK WQQL<br>NPDVPEALQA | CSPSCHSVSVKWRQLNP<br>DVPEALQA  |                               |                               |
|          |       | SNV              | GALNT5    | uc002tzc.3 | H      | Y          | 421  | HIKALLPEDSGTHQVL<br>RIDVTLSPR  | HIKALLPEDSGTYQVLRID<br>VTLSPR  |                               |                               |
|          |       | SNV              | AKAP6     | uc010aml.3 | P      | L          | 695  | VKKKHTRLGRVSPSSSS<br>DIASSLGE  | VKKKHTRLGRVSLSSSDI<br>ASSLGE   |                               |                               |
|          |       | SNV              | E2F4      | uc002erz.3 | S      | T          | 323  | SSSSSSSSNSNSSSSS<br>GPNPSTSF   | SSSSSSSSNSNTSSSSGP<br>NPSTSF   |                               |                               |
|          |       | SNV              | ZNF532    | uc010xeg.2 | T      | S          | 891  | FKSAPSTHSHAYTQHP<br>GIKIGEPKI  | FKSAPSTHSHAYSQHPI<br>KIGEPKI   |                               |                               |
|          |       | SNV              | COL19A1   | uc010kam.2 | P      | S          | 25   | WFLWQVLNQNPQI<br>SIVVDGGKKV    | WFLWQVLNQNIQISI<br>VVDGGKKV    |                               |                               |
|          |       | SNV              | C1QTNF1   | uc002jwt.3 | P      | S          | 92   | LPNSVPSLCVSFPPGP<br>GRKMGSRGQ  | LPNSVPSLCVSFSPGPR<br>KMGSRGQ   |                               |                               |
|          |       | SNV              | LOC150776 | uc002tsz.3 | E      | K          | 14   | DTSGSYTANDLDEMG<br>QDSVRKTDEY  | DTSGSYTANDLDMGQD<br>SVRKTDEY   |                               |                               |
|          |       | FS-<br>insertion | PARP6     | uc031qsq.1 |        |            | 236  | PSVVDPTDPKTLAFNP<br>KKKNYERLQ  | PSVVDPTDPKTL SGL               |                               |                               |
|          |       | NCI-3926         | TMG4      | SNV        | UBR7   | uc010auq.3 | K    | N                              | 101                            | VPEQKDDVREV KVE<br>QNSEPCAGSS | VPEQKDDVREV NVEQ<br>NSEPCAGSS |
|          |       |                  |           | SNV        | GXYLT1 | uc001rmt.4 | A    | T                              | 91                             | IQPVEKMHLAVVACG<br>ERLEETMTML | IQPVEKMHLAVVTCGERL<br>EETMTML |
| SNV      | SYVN1 |                  |           | uc009yqc.3 | P      | R          | 308  | EPADQGPPPAPHPPPL<br>LPQPPNFPQ  | EPADQGPPPAPHRPPLP<br>QPNNFPQ   |                               |                               |
| SNV      | SETX  |                  |           | uc010mzt.3 | Y      | H          | 2095 | SGFAKTSVAASLYHTPS<br>DSKEITLT  | SGFAKTSVAASLHHTPSD<br>SKEITLT  |                               |                               |
| SNV      | NCAPH |                  |           | uc002svz.1 | R      | Q          | 20   | LPATMNNSSSETRGH<br>PHSASSPSER  | LPATMNNSSSETQGHPH<br>SASSPSER  |                               |                               |
| SNV      | NCAPH |                  |           | uc010fhv.1 | R      | Q          | 9    | MGPPGPETRGHPHSA<br>SSPSER      | MGPPGPETQGHPHSASS<br>PSER      |                               |                               |

|          |         |              |                 |            |      |   |      |                   |                     |                    |                      |
|----------|---------|--------------|-----------------|------------|------|---|------|-------------------|---------------------|--------------------|----------------------|
|          |         | ENSG00000121 | ENST000004      |            |      |   |      |                   |                     | MNNSSETRGHPHSA     | MNNSSETQGHPHSASS     |
|          |         | SNV          | 152             | 55200      | R    | Q | 9    |                   |                     | SSPSE              | PSE                  |
|          |         | SNV          | PCIF1           | uc002xqs.3 | R    | C | 265  |                   |                     | SNCEPVVSPSMFREIM   | SNCEPVVSPSMFCEIMN    |
|          |         |              |                 |            |      |   |      |                   |                     | NDIPIRLSR          | DIPIRLSR             |
|          |         | SNV          | CHEK2           | uc010gvh.1 | K    | E | 282  |                   |                     | DCLIKITDFGHSKILGET | DCLIKITDFGHSEILGETSL |
|          |         |              |                 |            |      |   |      |                   |                     | SLMRTL             | MRTL                 |
|          |         | SNV          | CHEK2           | uc003adv.1 | K    | E | 344  |                   |                     | LLAVQITDFGHSKILGE  | LLAVQITDFGHSEILGETS  |
|          |         |              |                 |            |      |   |      |                   |                     | TSLMRTL            | LMRTL                |
|          |         | SNV          | TWIST1          | uc022aah.1 | A    | S | 195  |                   |                     | LSYAFSVWRMEGAWS    | LSYAFSVWRMEGSWSM     |
|          |         |              |                 |            |      |   |      |                   |                     | MSASH              | SASH                 |
|          |         | SNV          | ENSG00000122    | ENST000003 |      |   |      |                   |                     | RLSYAFSVWRMEGA     | RLSYAFSVWRMEVAWS     |
|          |         |              | 691             | 54571      | G    | V | 127  |                   |                     | WSMSASH            | MSASH                |
| NCI-3926 | TMG5    | SNV          | MLLT4           | uc021zim.1 | T    | S | 8    |                   |                     | MDGVVTVTPRSM       | MDGVVTVSPRSM         |
|          |         |              |                 |            |      |   |      |                   |                     | ETVEG              | VEG                  |
|          |         | SNV          | MLLT4           | uc021zik.1 | T    | S | 421  |                   |                     | CDLTNMDGVVTVTPR    | CDLTNMDGVVTVSPR      |
|          |         |              |                 |            |      |   |      |                   |                     | SMDAETVEG          | MDAETVEG             |
|          |         | SNV          | FASTKD2         | uc002vbx.3 | S    | L | 504  |                   |                     | TISSENLLDAVYSFCLM  | TISSENLLDAVYLFCLMNY  |
|          |         |              |                 |            |      |   |      |                   |                     | NYFPLAPF           | FPLAPF               |
|          |         | SNV          | UBE3B           | uc009zvj.2 | P    | S | 420  |                   |                     | ESQEPAAHAQPASPQN   | ESQEPAAHAQPASSQNVL   |
|          |         |              |                 |            |      |   |      |                   |                     | VLPVKSLKR          | PVKSLKR              |
|          |         | SNV          | SEC14L1         | uc021udx.1 | L    | F | 461  |                   |                     | SPFIDNTRRKF        | SPFIDNTRRKF          |
|          |         |              |                 |            |      |   |      |                   |                     | LIYAG              | LIYAGND              |
|          |         |              |                 |            |      |   |      |                   |                     | NDYQGG             | YQGG                 |
|          |         | SNV          | NCOR1           | uc010cpb.2 | Y    | S | 20   |                   |                     | PNQGAFSTEQSRYP     | PNQGAFSTEQSRSP       |
|          |         |              |                 |            |      |   |      |                   |                     | PHSV               | PHSV                 |
|          |         |              |                 |            |      |   |      |                   |                     | QYTFPNT            | QYTFPNT              |
| SNV      | CRYZ    | uc001dgm.3   | I               | V          | 51   |   |      | ILGTAGTEEGQKIVLQ  | ILGTAGTEEGQKVV      |                    |                      |
|          |         |              |                 |            |      |   |      | LQNG              | LQNG                |                    |                      |
| SNV      | AKAP9   | uc003uli.3   | R               | C          | 1570 |   |      | ERQIQEKTDIIDRLEQE | ERQIQEKTDIIDCLEQELL |                    |                      |
|          |         |              |                 |            |      |   |      | LLCASNRL          | CASNRL              |                    |                      |
| SNV      | STK39   | uc002uea.3   | R               | Q          | 406  |   |      | EEGKAAFSQEKSR     | EEGKAAFSQEKSRVKEE   |                    |                      |
|          |         |              |                 |            |      |   |      | RVK               | RVKEE               |                    |                      |
|          |         |              |                 |            |      |   |      | EENPEIAVS         | NPEIAVS             |                    |                      |
| SNV      | MLLT6   | uc002hqi.4   | K               | E          | 557  |   |      | SPLLGAGIYTSNKDPIS | SPLLGAGIYTSNEDPISHS |                    |                      |
|          |         |              |                 |            |      |   |      | HSGGMLRA          | GGMLRA              |                    |                      |
| SNV      | SETDB1  | uc009wmf.2   | L               | P          | 727  |   |      | GKGVFINTGPEFLVGC  | GKGVFINTGPEFPVGCDC  |                    |                      |
|          |         |              |                 |            |      |   |      | DCKDGRD           | KDGRD               |                    |                      |
| SNV      | SETDB1  | uc009wmg.2   | L               | P          | 726  |   |      | GKGVFINTGPEFLVGC  | GKGVFINTGPEFPVGCDC  |                    |                      |
|          |         |              |                 |            |      |   |      | DCKDGRDK          | KDGRDK              |                    |                      |
| NCI-3926 | TMG6    | SNV          | SORL1           | uc001pxx.3 | D    | N | 299  |                   |                     | RENQEVILEEVRDFQL   | RENQEVILEEVRNFQLRD   |
|          |         |              |                 |            |      |   |      |                   |                     | RDYMFATK           | KYMFATK              |
|          |         | SNV          | CPEB2           | uc003gnn.2 | P    | S | 783  |                   |                     | DWPHKAESKSYFPPKG   | DWPHKAESKSYFSPKGY    |
|          |         |              |                 |            |      |   |      |                   |                     | YAFLLFQEE          | AFLLFQEE             |
|          |         | SNV          | LAMA5           | uc021wfw.1 | R    | W | 2601 |                   |                     | ALQGARTQLRDVRAK    | ALQGARTQLRDVWAKK     |
|          |         |              |                 |            |      |   |      |                   |                     | KDQLEAHIQA         | DQLEAHIQA            |
|          |         | SNV          | PABPC1L         | uc010ggv.1 | S    | F | 399  |                   |                     | STMRTLNSPLLGSFQQ   | STMRTLNSPLLGFQQPS    |
|          |         |              |                 |            |      |   |      |                   |                     | PSSYFLPAM          | SYFLPAM              |
|          |         | SNV          | ANKHD1-EIF4EBP3 | uc011czh.1 | M    | I | 851  |                   |                     | SEPAPLTLTSPRMVAA   | SEPAPLTLTSPRIVAADN   |
|          |         |              |                 |            |      |   |      |                   |                     | DNQDTSNLP          | QDTSNLP              |
|          |         | SNV          | KIAA0556        | uc010vco.2 | P    | L | 44   |                   |                     | LAMVSHLVGGILPTCE   | LAMVSHLVGGILLTCEPT   |
|          |         |              |                 |            |      |   |      | PTVPYHTIL         | VPYHTIL             |                    |                      |
| SNV      | GOSR1   | uc002hff.3   | R               | K          | 15   |   |      | ETMAIEIEQLLARLTGV | ETMAIEIEQLLAKLTGVN  |                    |                      |
|          |         |              |                 |            |      |   |      | NDKMAEYT          | DKMAEYT             |                    |                      |
| SNV      | CNTNAP4 | uc010chb.1   | R               | W          | 615  |   |      | CEQEFTYYCKKSRLVN  | CEQEFTYYCKKSWLVNK   |                    |                      |
|          |         |              |                 |            |      |   |      | KQDGTPLSW         | QDGTPLSW            |                    |                      |
| SNV      | CNTNAP4 | uc010chb.1   | P               | S          | 435  |   |      | CPDKSFGSKCKSPLGG  | CPDKSFGSKCKSSLGGFQ  |                    |                      |
|          |         |              |                 |            |      |   |      | FQGCMLIS          | GCMRLIS             |                    |                      |
| SNV      | NAF1    | uc010iqw.1   | I               | V          | 162  |   |      | PPVLSGDGDDLQIEKE  | PPVLSGDGDDLQVEKEN   |                    |                      |
|          |         |              |                 |            |      |   |      | NKNFPLKTK         | KNFPLKTK            |                    |                      |

|          |                    |                 |                     |                     |          |            |                |                               |                                |                               |                               |
|----------|--------------------|-----------------|---------------------|---------------------|----------|------------|----------------|-------------------------------|--------------------------------|-------------------------------|-------------------------------|
|          |                    |                 |                     |                     |          |            | VWSGMCPEHRRVVQ |                               |                                |                               |                               |
|          |                    | SNV             | SDHAP2              | uc011btb.1          | V        | M          | 196            | A                             | VWSGMCPEHRRVMQA                |                               |                               |
|          |                    | SNV             | SDHAP2              | uc003fuu.4          | H        | Q          | 104            | AKNTIVATGLRAHLEL<br>HVCPHQH   | AKNTIVATGLRAQLLELH<br>VCPHQHQ  |                               |                               |
| NCI-3926 | TMG7               | SNV             | BRAF                | uc003vwc.4          | V        | E          | 600            | LTVKIGDFGLATVKSR<br>WSGSHQFEQ | LTVKIGDFGLATEKSRWS<br>GSHQFEQ  |                               |                               |
|          |                    | SNV             | ZNF343              | uc010gao.1          | H        | Y          | 36             | ENVETMKKLTQNHKA<br>KGLPSNDTDC | ENVETMKKLTQNYKAKG<br>LPSNDTDC  |                               |                               |
|          |                    | SNV             | ENSG00000004<br>139 | ENST000004<br>57710 | A        | D          | 336            | LQGKTKVFSDIGAIQSL<br>KRLVSYST | LQGKTKVFSDIGDIQSLKR<br>LVSYST  |                               |                               |
|          |                    | SNV             | SASS6               | uc009wdz.3          | K        | E          | 194            | QEQKVLEENGEKNQ<br>VQLGKLEATI  | QEQKVLEENGEENQVQ<br>LGKLEATI   |                               |                               |
|          |                    | SNV             | NCOA1               | uc010eye.3          | I        | T          | 481            | LNLNNSPMEGTGISLA<br>QFMSPRRQV | LNLNNSPMEGTGTSLAQ<br>FMSPRRQV  |                               |                               |
|          |                    | SNV             | OGFOD2              | uc009zxs.1          | S        | N          | 52             | LLYPDCGGGRLDSHRA<br>FVVKYAPGQ | LLYPDCGGGRLDNHRAF<br>VVKYAPGQ  |                               |                               |
|          |                    | SNV             | NBPF1               | uc010oce.1          | D        | E          | 408            | QHLQALLTPDEPKSQ<br>GQDLQEQLA  | QHLQALLTPDEPEKSQG<br>QDLQEQLA  |                               |                               |
|          |                    | SNV             | DOPEY2              | uc011aeb.2          | P        | S          | 856            | NPFFGKLMQMTVPPIA<br>PGILKVIAE | NPFFGKLMQMTVSPPIAG<br>ILKVIAE  |                               |                               |
|          |                    | SNV             | SNAPC4              | uc004chh.3          | P        | S          | 750            | RLLNRRLLAVTPWVG<br>DVVPCTQA   | RLLNRRLLAVTSWVGDV<br>VVPCTQA   |                               |                               |
|          |                    | SNV             | CNTRL               | uc004bkb.1          | V        | L          | 226            | LKPLQDLISLILVENPVV<br>TLPHYLQ | LKPLQDLISLILLENPVVTL<br>PHYLQ  |                               |                               |
|          |                    | FS-<br>deletion | KIAA1841            | uc002sav.4          |          |            | 375            | RCREDKIHTCIFVYIYI             | RCREDKIHTCIFVYIYI              |                               |                               |
|          |                    | SNV             | TRPC1               | uc003evc.3          | L        | R          | 508            | LVAEGLFANVLSYLR<br>LFFMYTTS   | LVAEGLFANVRSYLR<br>FMYTTS      |                               |                               |
|          |                    | NCI-3926        | TMG8                | SNV                 | ARHGEF17 | uc001otu.3 | S              | L                             | 1570                           | GLQPRCHREPPSLRS<br>PPETAPEPA  | GLQPRCHREPPPLLRSP<br>ETAPEPA  |
|          |                    |                 |                     | SNV                 | SALL2    | uc010tma.1 | S              | F                             | 701                            | EMDSNEKTTQQSSLPP<br>PPPDSDLQ  | EMDSNEKTTQQSFLPPP<br>PPDSDLQ  |
| SNV      | ARMCX5-<br>GPRASP2 |                 |                     | uc022cbh.1          | S        | F          | 409            | ASLEGGASAICESEPGT<br>EEGAIGGS | ASLEGGASAICEFEPGTEE<br>GAIGGS  |                               |                               |
| SNV      | PTPRH              |                 |                     | uc010esv.3          | N        | S          | 120            | SSVGTVTATAPNPVR<br>NLTVEAQTN  | SSVGTVTATAPSPVRNL<br>TVEAQTN   |                               |                               |
| SNV      | PTPRH              |                 |                     | uc002qjs.2          | N        | S          | 305            | SSVEIVTSATAPNPVR<br>NLTVEAQTN | SSVEIVTSATAPSPVRNL<br>VEAQTN   |                               |                               |
| SNV      | TCEAL2             |                 |                     | uc022car.1          | E        | K          | 209            | NLQDPFYPRGPRFRGG<br>GCRAPRRDT | NLQDPFYPRGPRFRGG<br>CRAPRRDT   |                               |                               |
| SNV      | SHROOM3            |                 |                     | uc011cbx.2          | G        | S          | 1650           | QSLSHDPVSGTQGLEK<br>KVSPDPQKS | QSLSHDPVSGTQSLKVV<br>SPDPQKS   |                               |                               |
| SNV      | NLGN3              |                 |                     | uc011mps.2          | R        | Q          | 696            | LAFALYRKRDKRRQE<br>PLRQSPQR   | LAFALYRKRDKQRQEPL<br>RQSPQR    |                               |                               |
| SNV      | AHDC1              |                 |                     | uc021ojw.1          | E        | K          | 1210           | LSSLEKLMMDWNEAS<br>SAPGYNWNQS | LSSLEKLMMDWKNKASSA<br>PGYNWNQS |                               |                               |
| SNV      | TMEM44             |                 |                     | uc011bsv.2          | H        | N          | 24             | WDWDYLDRCFARHR<br>VCISFGLWICA | WDWDYLDRCFARNRVC<br>SGLWICA    |                               |                               |
| SNV      | SNX29              |                 |                     | uc002dby.5          | S        | F          | 104            | EVLNKHELQRFYSLRHI<br>ASDVGRGR | EVLNKHELQRFYFLRHIA<br>DVGRGR   |                               |                               |
| SNV      | LAPTM5             |                 |                     | uc001bsc.2          | D        | N          | 2              | MDPRLSTVRQTCCC                | MNPRLSTVRQTCCC                 |                               |                               |
| NCI-3926 | TMG9               |                 |                     | SNV                 | MAN1A1   | uc003pym.2 | A              | V                             | 486                            | LTCFAGGMFALGADA<br>APEGMAQHYL | LTCFAGGMFALGVDAAP<br>EGMAQHYL |
|          |                    |                 |                     | SNV                 | MAPK8IP1 | uc001nbr.3 | S              | F                             | 341                            | ISEEEEGFDCLSSPERA<br>EPPGGGWR | ISEEEEGFDCLSFPERAEP<br>PGGGWR |
|          |                    | SNV             | PZP                 | uc009zgm.1          | T        | I          | 101            | VAEVGVTVPDTITIEWK             | VAEVGVTVPDTIIEWKAG             |                               |                               |

|          |                     |                 |                     |                     |         |            | AGAFLCSED | AFCLSED                       |                                   |                               |                               |
|----------|---------------------|-----------------|---------------------|---------------------|---------|------------|-----------|-------------------------------|-----------------------------------|-------------------------------|-------------------------------|
|          |                     | SNV             | SLC4A8              | uc010snk.2          | R       | C          | 454       | TFGGLLGEATEGRISAI<br>ESLFGASM | TFGGLLGEATEGCISAIESL<br>FGASM     |                               |                               |
|          |                     | SNV             | PHLDB2              | uc003dye.4          | P       | S          | 499       | AIFLFSPAILLPISLLIGL<br>FGYLE  | AIFLFSPAILLISILLIGLFG<br>YLE      |                               |                               |
|          |                     | SNV             | RYR2                | uc001hyl.1          | D       | N          | 753       | VSSPNQHLLRTDDVIS<br>CCLDLSAPS | VSSPNQHLLRTDNVISCC<br>LDLSAPS     |                               |                               |
|          |                     | SNV             | DPY19L2             | uc010sso.1          | I       | V          | 94        | AVFAGAMPTMASIKLS<br>TLHPVNHHP | AVFAGAMPTMASVKLST<br>LHPVNHHP     |                               |                               |
|          |                     | SNV             | FAM115C             | uc011ktn.1          | R       | Q          | 479       | KMLRGSGLPAVSREN<br>VADSSEYAA  | KMLRGSGLPAVSQENPV<br>ASDSEYAA     |                               |                               |
|          |                     | SNV             | NBPF10              | uc031poc.1          | G       | E          | 2580      | CPRLSRELLDEKGPEVL<br>QDSLDRCY | CPRLSRELLDEKEPEVLQD<br>SLDRCY     |                               |                               |
|          |                     | SNV             | ENSG00000163<br>386 | ENST000003<br>69339 | G       | E          | 357       | GPRLSRELLDEKGPEVL<br>QDSLDRCY | GPRLSRELLDEKEPEVLQ<br>DSLDRCY     |                               |                               |
|          |                     | FS-<br>deletion | TGFB2               | uc001hll.3          |         |            | 216       | CCCCCCCCFRQTL<br>LCHRLEYS     | CCCCCCCCFRQTL<br>QARVQWHDHSSLQP   |                               |                               |
|          |                     | SNV             | PCLO                | uc003uhx.2          | A       | T          | 2955      | VVYKLPFGRSCTAQQP<br>ATLPEDRF  | VVYKLPFGRSCTTQQPAT<br>TLPEDRF     |                               |                               |
| NCI-3926 | TMG10               | SNV             | RGAG1               | uc011msr.1          | D       | A          | 109       | SGALLPMPASDSGA<br>LSPMPAL     | SGALLPMPASASGALS<br>PMPAL         |                               |                               |
|          |                     | FS-<br>deletion | CASP5               | uc010ruz.1          |         |            | 23        | FIFLIEDSGKKRRKNFE<br>AMFKGIL  | FIFLIEDSGKKGVRIKLC<br>SKVSRVDWITS |                               |                               |
|          |                     | FS-<br>deletion | CASP5               | NM_004347           |         |            | 10        | MAEDSGKKRRKNFE<br>AMFKGIL     | MAEDSGKKGVRIKLC<br>KVSFRVDWITS    |                               |                               |
|          |                     | SNV             | CDKL5               | uc022btn.1          | R       | C          | 234       | PSEQMKLFYSNPRFHG<br>LRFPAVNHP | PSEQMKLFYSNPFHGLR<br>FPAVNHP      |                               |                               |
|          |                     | SNV             | LRP2                | uc002ues.3          | I       | M          | 777       | IFKQKIDGTGREILAAN<br>RVENVESL | IFKQKIDGTGREMLAANR<br>RVENVESL    |                               |                               |
|          |                     | SNV             | LRP2                | uc010zdf.1          | I       | M          | 640       | LTDDERHCIGREILAAN<br>RVENVESL | LTDDERHCIGREMLAAN<br>RVENVESL     |                               |                               |
|          |                     | SNV             | TRIL                | uc003szt.3          | P       | L          | 503       | QQPSPSVAAGAP<br>QSLDLHKKPQ    | QQPSPSVAAGLAPQS<br>LDLHKKPQ       |                               |                               |
|          |                     | SNV             | MUC5B               | uc001lta.3          | I       | T          | 2095      | PTTRGSTVTPSSIPGTT<br>HTATVLTT | PTTRGSTVTPSSTPGTTH<br>TATVLTT     |                               |                               |
|          |                     | SNV             | PSG4                | uc002owb.4          | E       | K          | 264       | RSGENLYLSCFAESNPR<br>AQYSWTIN | RSGENLYLSCFAKSNPRA<br>QYSWTIN     |                               |                               |
|          |                     | SNV             | SPARCL1             | uc011cdd.2          | D       | N          | 333       | ADQQGKPHCVCQDP<br>VTCPTKPLDQ  | ADQQGKPHCVCQNPVT<br>CPPTKPLDQ     |                               |                               |
|          |                     | SNV             | SLC38A3             | NM_006841           | G       | S          | 81        | GMSVFNLNNAIMGSG<br>ILGLAYAMAN | GMSVFNLNNAIMSSGILG<br>LAYAMAN     |                               |                               |
|          |                     | SNV             | GOLGA6B             | uc010uks.1          | E       | D          | 421       | LWDQEERLWKKERL<br>QKQEERLALS  | LWDQEERLWKKEDRLQK<br>QEERLALS     |                               |                               |
|          |                     | NCI-3926        | TMG11               | SNV                 | KRT7    | uc001saa.1 | Y         | N                             | 283                               | MAKCSRAEAEAWYQT<br>KFETLQAQAG | MAKCSRAEAEAWNQTK<br>FETLQAQAG |
|          |                     |                 |                     | SNV                 | PCDHB17 | uc003lis.3 | R         | C                             | 461                               | PAFTQTSYTLFVRENN<br>SPALHIGSV | PAFTQTSYTLFVCENN<br>ALHIGSV   |
| SNV      | PLEKHA6             |                 |                     | uc009xbc.1          | S       | F          | 67        | PVYYDELDAASSLRR<br>SLQPRSHS   | PVYYDELDAASSFLRR<br>SLQPRSHS      |                               |                               |
| SNV      | SLIT2               |                 |                     | uc003gps.1          | G       | S          | 1022      | NNYTCLCPPEYTGELC<br>EEKLDFCAQ | NNYTCLCPPEYSELCEEK<br>LDFCAQ      |                               |                               |
| SNV      | ENSG00000145<br>147 |                 |                     | ENST000002<br>73739 | A       | T          | 1034      | NNYTCLCPPEYTAANL<br>NEVEKGELC | NNYTCLCPPEYTANLNE<br>VEKGELC      |                               |                               |
| SNV      | CSMD1               |                 |                     | uc022aqr.1          | R       | K          | 1407      | GMPQNGTRYGDSREA<br>GDTVTFQCDP | GMPQNGTRYGDSKEAG<br>DTVTFQCDP     |                               |                               |

AA = Amino acid. SNV = non-synonymous single nucleotide variant. FS = frameshift. Green highlight = identified immunogenic; NFS = Non-frameshift

**Supplementary Table 3. Binding affinity of candidate immunogenic peptides to the patient-specific HLA-I molecules based on prediction algorithms**

| Patient ID | Mutated protein                | Wild-type epitope | Mutated epitope              | Affinity wild-type (nM) | Affinity mutant (nM) | Rank wild-type (%-tile) | Rank mutant (%-tile) | Allele  |
|------------|--------------------------------|-------------------|------------------------------|-------------------------|----------------------|-------------------------|----------------------|---------|
| NCI-3998   | MAGEA6 <sub>E168K</sub>        | EVDPIGHVYI        | <b>K</b> VDPIGHVYI           | 12                      | 6                    | 0.4                     | 0.2                  | C*05:01 |
|            |                                | EVDPIGHVYIF       | <b>K</b> VDPIGHVYIF          | 9                       | 5                    | 0.3                     | 0.2                  | C*05:01 |
|            |                                | EVDPIGHVY         | <b>K</b> VDPIGHVY            | 36                      | 77                   | 0.35                    | 0.3                  | A*01:01 |
|            |                                | LMEVDPIGHVY       | <b>L</b> M <b>K</b> VDPIGHVY | 394                     | 47                   | 2.8                     | 0.5                  | B*15:01 |
|            | PDSA5 <sub>Y1000F;H1007Y</sub> | PEYVVPYMIH        | <b>P</b> EFVVPYMI <b>H</b>   | 6823                    | 105                  | 4.05                    | 0.25                 | B*18:01 |
|            |                                | YVVPYMIHLL        | <b>F</b> VVPYMI <b>L</b> LL  | 6                       | 6                    | 0.4                     | 0.4                  | C*03:03 |
|            |                                | SLLPEYVVPY        | SLL <b>P</b> EFVVPY          | 29                      | 23                   | 0.55                    | 0.5                  | B*15:01 |
|            |                                | LSLLPEYVVPY       | LSLL <b>P</b> EFVVPY         | 3278                    | 3232                 | 0.7                     | 0.7                  | A*01:01 |
|            |                                | LLPEYVVPY         | LL <b>P</b> EFVVPY           | 43                      | 58                   | 0.6                     | 0.5                  | B*15:01 |
|            |                                | YMIHLLAH          | YMI <b>L</b> LLAH            | 93                      | 74                   | 1.1                     | 0.9                  | B*15:01 |
|            | MED13 <sub>P1691S</sub>        | VQIIPCQY          | <b>V</b> QI <b>S</b> CQY     | 253                     | 165                  | 0.75                    | 0.55                 | A*30:02 |
|            |                                | VQIIPCQY          | <b>V</b> QI <b>S</b> CQY     | 81                      | 48                   | 0.9                     | 0.6                  | B*15:01 |
|            |                                | VSVQIIPCQY        | <b>V</b> SVQI <b>S</b> CQY   | 202                     | 148                  | 0.8                     | 0.65                 | A*30:02 |
|            |                                | SVQIIPCQY         | <b>S</b> VQI <b>S</b> CQY    | 605                     | 300                  | 1.35                    | 0.95                 | A*30:02 |
|            |                                | VSVQIIPCQYL       | <b>V</b> SVQI <b>S</b> CQYL  | 17                      | 17                   | 1                       | 1                    | C*03:03 |
|            |                                | SVQIIPCQY         | <b>S</b> VQI <b>S</b> CQY    | 5190                    | 5168                 | 1.6                     | 1.6                  | A*01:01 |
| NCI-3784   | FLNA <sub>R2049C</sub>         | RVRVSGQGL         | <b>C</b> VRVSGQGL            | 17                      | 553                  | 0.5                     | 2                    | B*07:02 |
|            |                                | QSEIGDASRV        | QSEIGDAS <b>C</b> V          | 15084                   | 14548                | 5.85                    | 4.7                  | A*01:01 |
|            | KIB16B <sub>L1009P</sub>       | ALARLERRHSA       | <b>A</b> PARLERRHSA          | 6270                    | 33                   | 19.9                    | 1                    | B*07:02 |
|            |                                | ALARLERRHS        | <b>A</b> PARLERRHS           | 25367                   | 1572                 | 32                      | 1.5                  | B*07:02 |
|            | SON <sub>R1927C</sub> *        | RARSRTPSR         | RARSRT <b>P</b> SC           | 5568                    | 178                  | 2.4                     | 1.2                  | B*07:02 |
|            |                                | TPSRRSRSH         | TPS <b>C</b> RSRSH           | 503                     | 1188                 | 1.2                     | 1.5                  | B*07:02 |
| TPSRRSR    |                                | TPS <b>C</b> RSRS | 10901                        | 4212                    | 3.05                 | 1.8                     | B*07:02              |         |
| NCI-3903   | KIF1BP <sub>P246S</sub>        | EHNAYHPIEWAI      | <b>H</b> SNAYHSIEWAI         | 333                     | 347                  | 0.3                     | 0.3                  | B*38:01 |
|            |                                | HNAYHPIEWAI       | <b>H</b> SNAYHSIEWAI         | 12630                   | 12554                | 5.4                     | 5.4                  | B*38:01 |
|            |                                | NAYHPIEWAI        | <b>N</b> SNAYHSIEWAI         | 16                      | 21                   | 0.5                     | 0.6                  | C*12:03 |
|            |                                | AYHPIEWAI         | <b>A</b> SNAYHSIEWAI         | 158                     | 115                  | 0.6                     | 0.6                  | A*24:02 |
|            |                                | YHPIEWAI          | <b>Y</b> SNAYHSIEWAI         | 2742                    | 308                  | 1.1                     | 0.3                  | B*38:01 |
|            |                                | HPIEWAI           | <b>H</b> SNAYHSIEWAI         | n.d.                    | n.d.                 | n.d.                    | n.d.                 | n.d.    |

Predictions determined by IEDB<sup>1</sup>, interrogating 8-11-mer peptides. Candidate minimal mutated epitopes were synthesized based on <500 nM affinity or top 2 percentile (%-tile) rank. Binding affinity and percentile rank for each peptide and HLA allele specified is shown.

The mutated amino acid is bolded in red. Peptides highlighted in grey or yellow were recognized. The most immunogenic minimal neo-epitopes, which showed a greater reactivity either by IFN- $\gamma$  ELISPOT or percentage 4-1BB upregulation compared to the rest of the peptides tested, are highlighted in yellow. \*The SON mutation-specific lymphocytes did not recognize any of the candidate minimal epitopes tested thus far



**Supplementary Table 4. Amino acid sequence of the functional mutation-reactive T cell receptors isolated from the peripheral blood CD8<sup>+</sup>PD-1<sup>+</sup> subset of NCI-3998**

| Patient ID | Reactivity                                          | TRA rank/<br>TRB rank<br>(T cell<br>population<br>of origin) | TRAV /TRAJ                    | TCR alpha chain<br>V-J amino acid sequence<br>(CDR3 highlighted)                                                                                             | TRBV/TRBJ                 | TCR beta chain<br>V-D-J amino acid sequence<br>(CDR3 highlighted)                                                                                         |
|------------|-----------------------------------------------------|--------------------------------------------------------------|-------------------------------|--------------------------------------------------------------------------------------------------------------------------------------------------------------|---------------------------|-----------------------------------------------------------------------------------------------------------------------------------------------------------|
| NCI-3998   | MAGEA6 <sub>E168K</sub><br>-specific TCR            | A1/B1<br>(TMG1-<br>enriched)                                 | TRAV21*01/<br>TRAJ21*01F      | METLLGLLILWLQLQWVSSK<br>QEVTVQIPAAALSVPEGENLVLN<br>CSFTDSAIYNLQWFRQDPGK<br>GLTSLLIQSSQREQTSGRINA<br>SLDKSSGRSTLYIAASQPGDSA<br>TYLCAVDNFKFYFGSGTKLN<br>VKP    | TRBV7-3*01/<br>TRBJ1-2*01 | MGTRLLCWAALCLLGADHTGAGVS<br>QTPSNKVTEKGYVELRCDPISGHTA<br>LYWYRQSLGQGPEFLIYFQGTGAAD<br>DSGLPNDRFFAVRPEGSVSTLKIQRTE<br>RGDSAVYLCASSSQGGYGYTFGSGTR<br>LTVV   |
|            | MAGEA6 <sub>E168K</sub><br>-specific TCR            | A2/B2<br>(TMG1-<br>enriched)                                 | TRAV39*01/<br>TRAJ58*01       | MKKLLAMILWLQLDRLSGELK<br>VEQNPLFLSMQEGKNYTIYCN<br>YSTTSDRLYWYRQDPGKSLKES<br>LFVLLSNGAVKQEGRLMASLD<br>TKARLSTLHITAAVHDLSATYF<br>CAGSGSRLTFEGEGTQLTVNP         | TRBV7-6*01/<br>TRBJ1-2*01 | MGTSLLCWVVLGFLGTDHTGAGVS<br>QSPRYKVTKRGQDVALRCDPISGHVS<br>LYWYRQALGQGPEFLTYFNIEAQQD<br>KSGLPNDRFSAERPEGSISTLTIQRTE<br>QRDSAMYRCASSFDRGYGYTFGSGT<br>RLTVV  |
|            | PDS5A <sub>Y1000F;H1</sub><br>007Y<br>-specific TCR | A1/B2<br>(TMG3-<br>enriched)                                 | TRAV38-<br>1*01/<br>TRAJ53*01 | MTRVSLWVAVVSTCLES<br>AQTVTQSQPEMSVQEAETVT<br>LSCYDTSENNYLFWYKQPP<br>SRQMILVIRQEAYKQQNATE<br>NRFVSNFQKAAKSFLKISDS<br>QLGDTAMYFCAFTELNSGGS<br>NYKLTFGKGTLLTVNP | TRBV27*01/<br>TRBJ2-2*01  | MGPQLLGYVVLCLLGAGPLEAQVTQ<br>NPRYLITVTGKKLTVTCSQNMNHEY<br>MSWYRQDPGLRQIYYSMNVEVT<br>DKGDVPEGYKVSKEKRNFLILESPS<br>PNQTSLYFCASSLGGLLRTGELFFGE<br>GSRLTVL    |
|            | MED13 <sub>P1691S</sub><br>-specific TCR            | A1/B1<br>(TMG5-<br>enriched)                                 | TRAV12-<br>1*01/<br>TRAJ27*01 | MISLRVLLVILWLQLSWVWS<br>QRKEVEQDPGPFNVPEGATV<br>AFNCTYSNSASQSFFWYRQD<br>CRKEPKLLMSVYSSGNEGDRF<br>TAQLNRASQYISLLIRDSKLS<br>SATYLCVVNTNAGKSTFGDGT<br>TLTVKP    | TRBV9*01/<br>TRBJ2-1*01   | MGFRLLCCVAFCLLGAGPVDGVTQ<br>TPKHLITATGQQRVTLRCSRSGDLSVY<br>WYQQSLDQGLQFLIQYYNGEERAKG<br>NILERFSAQQFPDLHSELNLSLELGD<br>SALYFCASSGRVTGGFYNEQFFGPGT<br>RLTVL |
|            | MED13 <sub>P1691S</sub><br>-specific TCR            | A2/B2<br>(TMG5-<br>enriched)                                 | TRAV12-<br>2*01/<br>TRAJ29*01 | MKSLRVLLVILWLQLSWVWS<br>QQKEVEQNSGPLSVPEGAIAS<br>LNCTYSDRGSQSFFWYRQYS<br>GKSPPELIMFIYSNGDKEDGRF<br>TAQLNKASQYVLLIRDSQPS<br>DSATYLCASSGGNTPLVFGKG<br>TRLSVIA  | TRBV27*01/<br>TRBJ2-7*01  | MGPQLLGYVVLCLLGAGPLEAQVTQ<br>NPRYLITVTGKKLTVTCSQNMNHEY<br>MSWYRQDPGLRQIYYSMNVEVT<br>DKGDVPEGYKVSKEKRNFLILESPS<br>PNQTSLYFCASSFGGAYEQYFGPGTR<br>LTVT       |

The amino acid sequences of the TRAV-TRAJ or the TRBV-TRBD-TRBJ rearrangements, encoding for the hypervariable region of the TRA and TRB genes, used to construct each TCR are shown. The amino acid sequence of the complementarity determining region 3 (CDR3) important for peptide recognition is highlighted in grey.

**Supplementary Table 5. Relative frequency of T cell reactivities in the circulating or tumor-infiltrating T cell subsets targeting mutated neoantigens, self-antigens, and the autologous tumor cell lines**

|            |                                       | Peripheral blood                   |                                           |                                     |                                           | Tumor                              |                                           |
|------------|---------------------------------------|------------------------------------|-------------------------------------------|-------------------------------------|-------------------------------------------|------------------------------------|-------------------------------------------|
|            |                                       | CD8 <sup>+</sup> PD-1 <sup>+</sup> |                                           | CD8 <sup>+</sup> PD-1 <sup>hi</sup> |                                           | CD8 <sup>+</sup> PD-1 <sup>+</sup> |                                           |
| Patient ID |                                       | Percentage 4-1BB <sup>+</sup>      | Percentage of total reactivities detected | Percentage 4-1BB <sup>+</sup>       | Percentage of total reactivities detected | Percentage 4-1BB <sup>+</sup>      | Percentage of total reactivities detected |
| NCI-3998   | MAGEA6 <sub>E168K</sub> (TMG1)        | 2.4                                | 10.0                                      | 2.9                                 | 8.8                                       | 3.8                                | 30.1                                      |
|            | PDS5A <sub>V1000F;H1007Y</sub> (TMG3) | 0.6                                | 2.5                                       | 0.5                                 | 1.5                                       | 0.2                                | 1.6                                       |
|            | MED13 <sub>P1691S</sub> (TMG5)        | 0.3                                | 1.3                                       | N.D.                                | N.D.                                      | 0.9                                | 7.4                                       |
|            | <b>Mutated antigens</b>               | <b>3.3</b>                         | <b>13.8</b>                               | <b>3.4</b>                          | <b>10.3</b>                               | <b>4.9</b>                         | <b>40.2</b>                               |
|            | NY-ESO-1                              | 20.7                               | 86.2                                      | 29.7                                | 89.7                                      | 7.3                                | 59.8                                      |
|            | <b>Self-antigens</b>                  | <b>20.7</b>                        | <b>86.2</b>                               | <b>29.7</b>                         | <b>89.7</b>                               | <b>7.3</b>                         | <b>59.8</b>                               |
|            | <b>3998mel</b>                        | 9.5                                |                                           | 7.2                                 |                                           |                                    | 11.2                                      |
| NCI-3784   | FLNA <sub>R2049C</sub> (TMG3)         | 0.4                                | 16.0                                      | 1.4                                 | 26.4                                      | 0.4                                | 16.0                                      |
|            | KIB16B <sub>L1009P</sub> (TMG5)       | 0.4                                | 16.0                                      | 0.4                                 | 7.5                                       | 0.6                                | 24.0                                      |
|            | SON <sub>R1927C</sub> (TMG8)          | 1                                  | 40.0                                      | 0.6                                 | 11.3                                      | 0.6                                | 24.0                                      |
|            | <b>Mutated antigens</b>               | <b>1.8</b>                         | <b>72.0</b>                               | <b>2.4</b>                          | <b>45.3</b>                               | <b>1.6</b>                         | <b>64.0</b>                               |
|            | MAGEA3                                | N.D.                               | <b>N.D.</b>                               | 0.8                                 | 15.1                                      | N.D.                               | N.D.                                      |
|            | GP100                                 | 0.7                                | 28.0                                      | 2.1                                 | 39.6                                      | 0.9                                | 36.0                                      |
|            | <b>Self-antigens</b>                  | <b>0.7</b>                         | <b>28.0</b>                               | <b>2.9</b>                          | <b>54.7</b>                               | <b>0.9</b>                         | <b>36.0</b>                               |
|            | <b>3784mel</b>                        | *24.6                              |                                           | *44.9                               |                                           |                                    | *45.2                                     |
| NCI-3903   | KIF1BP <sub>P246S</sub> (TMG9)        | 1.3                                | 39.4                                      |                                     |                                           | 5.8                                | 75.3                                      |
|            | TMG4 (antigen unknown)                | N.D.                               | N.D.                                      |                                     |                                           | 0.3                                | 3.9                                       |
|            | <b>Mutated antigens</b>               | <b>1.3</b>                         | <b>39.4</b>                               |                                     |                                           | <b>6.5</b>                         | <b>79.2</b>                               |
|            | SSX2                                  | 2.0                                | 60.6                                      |                                     |                                           | 1.6                                | 20.8                                      |
|            | <b>Self-antigens</b>                  | <b>2.0</b>                         | <b>66.6</b>                               |                                     |                                           | <b>1.6</b>                         | <b>20.8</b>                               |
|            | <b>3903mel</b>                        | 7.8                                |                                           |                                     |                                           |                                    | 10.2                                      |
| NCI-3926   | <b>Mutated antigens</b>               | <b>0.0</b>                         | <b>0.0</b>                                | <b>0.0</b>                          | <b>0.0</b>                                | <b>0.0</b>                         | <b>0.0</b>                                |
|            | NY-ESO-1                              | 1.7                                | 100.0                                     | 1.4                                 | 100.0                                     | 3.4                                | 70.8                                      |
|            | MART1                                 | N.D.                               |                                           | N.D.                                |                                           | 0.5                                | 10.4                                      |
|            | GP100                                 | N.D.                               |                                           | N.D.                                |                                           | 0.9                                | 18.8                                      |
|            | <b>Self-antigens</b>                  | <b>1.7</b>                         | <b>100.0</b>                              | <b>1.4</b>                          | <b>100.0</b>                              | <b>4.8</b>                         | <b>100.0</b>                              |
|            | <b>3926mel</b>                        | *6.3                               |                                           | *7.7                                |                                           |                                    | *13.3                                     |

The absolute and relative frequency of circulating or tumor-infiltrating CD8<sup>+</sup>PD-1<sup>+</sup> T cells targeting mutations, self-antigens, and the corresponding autologous tumor cell lines (3998mel, 3784mel, 3903mel, or 3926mel) is shown. Recognition of mutated antigens (TMGs), self-antigens (NY-ESO-1, MAGEA3, SSX2, MART1, GP100, and TYR), and the autologous tumor cell line for each of the patients was evaluated simultaneously in one experiment. IFN-γ ELISPOT and 4-1BB up-regulation were analyzed at 20 h. Only the frequencies from the conditions that demonstrated >40 spots and >twice the background by IFN-γ ELISPOT are shown. For subjects NCI-3998 and 3903 the frequency of T cells recognizing a given antigen was based on the percentage 4-1BB up-regulation at 20 h after coculture. Data are gated on CD3<sup>+</sup> cells. The frequency of 4-1BB expression against the irrelevant control was subtracted. For subjects NCI-3784 and 3926 the frequency of the reactivities was calculated based on IFN-γ ELISPOT data, as the frequencies were low and sometimes undetectable over background using 4-1BB upregulation. N.D. = Not detected. \*The frequency of tumor-reactive cells for subjects NCI-3784 and NCI-3926 using IFN-γ ELISPOT was off-scale. For these, the frequency of autologous tumor-reactive cells was based on the percentage of 4-1BB up-regulation. Data are representative of at least two independent experiments

**Supplementary Table 6. Summary of TRB overlap between circulating and tumor-resident CD8<sup>+</sup> lymphocyte subsets**

|             |      | PBMC      |           |           |       |           |           |       |           |           |            |       |           |           |            |       |           |           |       |           |           |      |           |           |       |       |       |
|-------------|------|-----------|-----------|-----------|-------|-----------|-----------|-------|-----------|-----------|------------|-------|-----------|-----------|------------|-------|-----------|-----------|-------|-----------|-----------|------|-----------|-----------|-------|-------|-------|
|             |      | 3903      |           |           | 3926  |           |           | 3998  |           |           |            | 3992  |           |           |            | 3713  |           |           | 3759  |           |           | 3784 |           |           |       |       |       |
|             |      | CD8+      | CD8+PD-1- | CD8+PD-1+ | CD8+  | CD8+PD-1- | CD8+PD-1+ | CD8+  | CD8+PD-1- | CD8+PD-1+ | CD8+PD-1hi | CD8+  | CD8+PD-1- | CD8+PD-1+ | CD8+PD-1hi | CD8+  | CD8+PD-1- | CD8+PD-1+ | CD8+  | CD8+PD-1- | CD8+PD-1+ | CD8+ | CD8+PD-1- | CD8+PD-1+ |       |       |       |
| Fresh Tumor | 3903 | CD8+      | 0.227     | 0.262     | 0.597 |           |           |       |           |           |            |       |           |           |            |       |           |           |       |           |           |      |           |           |       |       |       |
|             |      | CD8+PD-1- | 0.396     | 0.382     | 0.203 |           |           |       |           |           |            |       |           |           |            |       |           |           |       |           |           |      |           |           |       |       |       |
|             |      | CD8+PD-1+ | 0.097     | 0.133     | 0.630 |           |           |       |           |           |            |       |           |           |            |       |           |           |       |           |           |      |           |           |       |       |       |
|             | 3926 | CD8+      |           |           |       | 0.134     | 0.119     | 0.190 |           |           |            |       |           |           |            |       |           |           |       |           |           |      |           |           |       |       |       |
|             |      | CD8+PD-1- |           |           |       | 0.134     | 0.118     | 0.099 |           |           |            |       |           |           |            |       |           |           |       |           |           |      |           |           |       |       |       |
|             |      | CD8+PD-1+ |           |           |       | 0.094     | 0.072     | 0.316 |           |           |            |       |           |           |            |       |           |           |       |           |           |      |           |           |       |       |       |
|             | 3998 | CD8+      |           |           |       |           |           | 0.123 | 0.081     | 0.445     | 0.307      |       |           |           |            |       |           |           |       |           |           |      |           |           |       |       |       |
|             |      | CD8+PD-1- |           |           |       |           |           | 0.114 | 0.101     | 0.140     | 0.045      |       |           |           |            |       |           |           |       |           |           |      |           |           |       |       |       |
|             |      | CD8+PD-1+ |           |           |       |           |           | 0.098 | 0.060     | 0.484     | 0.363      |       |           |           |            |       |           |           |       |           |           |      |           |           |       |       |       |
|             | 3992 | CD8+      |           |           |       |           |           |       |           |           |            | 0.420 | 0.261     | 0.525     | 0.371      |       |           |           |       |           |           |      |           |           |       |       |       |
|             |      | CD8+PD-1- |           |           |       |           |           |       |           |           |            | 0.449 | 0.307     | 0.468     | 0.245      |       |           |           |       |           |           |      |           |           |       |       |       |
|             |      | CD8+PD-1+ |           |           |       |           |           |       |           |           |            | 0.211 | 0.035     | 0.576     | 0.710      |       |           |           |       |           |           |      |           |           |       |       |       |
|             | 3713 | CD8+      |           |           |       |           |           |       |           |           |            |       |           |           |            | 0.414 | 0.352     | 0.388     |       |           |           |      |           |           |       |       |       |
|             |      | CD8+PD-1- |           |           |       |           |           |       |           |           |            |       |           |           |            | 0.465 | 0.438     | 0.271     |       |           |           |      |           |           |       |       |       |
|             |      | CD8+PD-1+ |           |           |       |           |           |       |           |           |            |       |           |           |            | 0.067 | 0.041     | 0.290     |       |           |           |      |           |           |       |       |       |
|             | 3759 | CD8+      |           |           |       |           |           |       |           |           |            |       |           |           |            |       |           |           | 0.157 | 0.104     | 0.467     |      |           |           |       |       |       |
|             |      | CD8+PD-1- |           |           |       |           |           |       |           |           |            |       |           |           |            |       |           |           | 0.264 | 0.256     | 0.134     |      |           |           |       |       |       |
|             |      | CD8+PD-1+ |           |           |       |           |           |       |           |           |            |       |           |           |            |       |           |           | 0.055 | 0.010     | 0.482     |      |           |           |       |       |       |
|             | 3784 | CD8+      |           |           |       |           |           |       |           |           |            |       |           |           |            |       |           |           |       |           |           |      |           |           | 0.215 | 0.200 | 0.228 |
|             |      | CD8+PD-1- |           |           |       |           |           |       |           |           |            |       |           |           |            |       |           |           |       |           |           |      |           |           | 0.209 | 0.206 | 0.081 |
|             |      | CD8+PD-1+ |           |           |       |           |           |       |           |           |            |       |           |           |            |       |           |           |       |           |           |      |           |           | 0.096 | 0.083 | 0.256 |

Analysis of TRB overlap of nucleotide sequences encoding for the variable V-D-J region of the TRB gene was performed using immunoSEQ (Adaptive Biotechnologies) using the following formula (Sample TCRB overlap between population A and B = [shared sequence reads in A + shared sequence reads in B]/Σsequence reads in A + B). A TRB overlap of 1 represents 100% overlap between two populations. The cells were color coded based on lower (yellow) to greater (blue) TRB overlap

**Supplementary Table 7. Relative frequency of the specificities detected in the TIL infusion product of subjects NCI-3998, 3784, 3903, 3926**

| Patient ID | Clinical outcome in response to TIL therapy | Specificities detected in the infusion bag                                                                   |
|------------|---------------------------------------------|--------------------------------------------------------------------------------------------------------------|
| NCI-3998   | NR                                          | TMG1 (MAGEA6 <sub>E&gt;K</sub> ), TMG5 (MED13 <sub>P&gt;S</sub> ), NY-ESO-1                                  |
| NCI-3784   | CR                                          | TMG3 (FLNA <sub>R&gt;C</sub> ), TMG4, TMG5 (KIF16B <sub>L&gt;P</sub> ), TMG8 (SON <sub>R&gt;C</sub> ), GP100 |
| NCI-3903   | CR                                          | TMG8, TMG9 (KIF1BP <sub>P&gt;S</sub> ), SSX2                                                                 |
| NCI-3926   | NR                                          | MART1, GP100, TYR, NY-ESO-1                                                                                  |

Clinical outcome of the patients following treatment with non-myeloablative preparative regimen, TIL, and high-dose IL-2 was evaluated using RECIST criteria. CR = complete responder; NR = non-responder. The TIL infusion bag was co-incubated with autologous DCs transfected with the autologous TMG RNA encoding for mutated neoantigens identified by exome sequencing, or with RNA encoding for self-antigens MART1, GP100, TYR, NY-ESO-1, MAGEA3, and SSX2. IFN- $\gamma$  ELISPOT at 20 h was used to evaluate reactivity. Reactivities >40 spots and >than twice the background are shown. The specific antigen recognized encoded by the TMG is shown in parenthesis. TIL infusion products were generated as previously described<sup>2</sup>

**Supplementary Table 8. Subjects included in the phenotypic characterization of TIL and circulating lymphocytes**

| <b>Variable/trait</b>  | <b>Total (%)</b> |
|------------------------|------------------|
| Total no. patients     | 18               |
| <b>Sex</b>             |                  |
| Male                   | 14 (78)          |
| Female                 | 4 (22)           |
| <b>Age</b>             |                  |
| 31-40                  | 4 (22)           |
| 41-50                  | 3 (17)           |
| 51-60                  | 9 (50)           |
| 61-70                  | 2 (11)           |
| <b>Prior Treatment</b> |                  |
| Surgery                | 17 (94)          |
| Chemotherapy           | 2 (11)           |
| Radiotherapy           | 2 (11)           |
| Immunotherapy          | 12 (67)          |
| Any 2 or more          | 13 (72)          |
| Any 3 or more          | 8 (44)           |
| No treatment           | 1 (5)            |

**Supplementary Table 9. Reactivity of circulating CD8<sup>+</sup>PD-1<sup>+</sup> T cell replicate cultures derived from subjects NCI-3713 or 3784**

| T cell subsets                                         | IFN- $\gamma$ ELISPOT NCI-3713 circulating T cell subsets after <i>in vitro</i> expansion (spots/2 $\times 10^4$ cells) |    |                        |    |                         |    |                         |     |                         |    |                         |    |                         |    |                   | 3713mel            | Anti-CD3           |
|--------------------------------------------------------|-------------------------------------------------------------------------------------------------------------------------|----|------------------------|----|-------------------------|----|-------------------------|-----|-------------------------|----|-------------------------|----|-------------------------|----|-------------------|--------------------|--------------------|
|                                                        | WDR46 <sub>T&gt;I</sub>                                                                                                 |    | SRPX <sub>P&gt;L</sub> |    | AFMID <sub>A&gt;V</sub> |    | HELZ2 <sub>D&gt;N</sub> |     | CENPL <sub>P&gt;L</sub> |    | AHNAK <sub>S&gt;F</sub> |    | PRDX3 <sub>P&gt;L</sub> |    |                   |                    |                    |
|                                                        | DMSO                                                                                                                    | WT | MUT                    | WT | MUT                     | WT | MUT                     | WT  | MUT                     | WT | MUT                     | WT | MUT                     | WT | MUT               |                    |                    |
| CD8 <sup>+</sup> PD-1 <sup>-</sup> 3 $\times 10^3$ /1  | 1                                                                                                                       | 0  | 2                      | 3  | 5                       | 1  | 3                       | 3   | 1                       | 2  | 7                       | 5  | 3                       | 2  | 3                 | 2                  | <b><u>1447</u></b> |
| CD8 <sup>+</sup> PD-1 <sup>-</sup> 3 $\times 10^3$ /2  | 0                                                                                                                       | 0  | 0                      | 2  | 1                       | 4  | 2                       | 0   | 2                       | 7  | 1                       | 0  | 2                       | 5  | 3                 | 2                  | <b><u>1428</u></b> |
| CD8 <sup>+</sup> PD-1 <sup>+</sup> 3 $\times 10^3$ /1  | 24                                                                                                                      | 12 | <b><u>142</u></b>      | 8  | <b><u>266</u></b>       | 5  | <b><u>52</u></b>        | 109 | <b><u>466</u></b>       | 5  | <b><u>74</u></b>        | 3  | <b><u>49</u></b>        | 79 | 15                | <b><u>1156</u></b> | <b><u>1438</u></b> |
| CD8 <sup>+</sup> PD-1 <sup>+</sup> 3 $\times 10^3$ /2  | 1                                                                                                                       | 16 | <b><u>318</u></b>      | 14 | <b><u>172</u></b>       | 4  | <b><u>61</u></b>        | 17  | <b><u>509</u></b>       | 13 | <b><u>104</u></b>       | 10 | 14                      | 10 | <b><u>176</u></b> | <b><u>1030</u></b> | <b><u>1288</u></b> |
| CD8 <sup>+</sup> PD-1 <sup>+</sup> 1 $\times 10^3$ /3  | 5                                                                                                                       | 1  | <b><u>213</u></b>      | 3  | <b><u>215</u></b>       | 0  | 4                       | 88  | <b><u>294</u></b>       | 6  | <b><u>44</u></b>        | 3  | 3                       | 7  | 18                | <b><u>967</u></b>  | <b><u>1231</u></b> |
| CD8 <sup>+</sup> PD-1 <sup>+</sup> 1 $\times 10^3$ /4  | 7                                                                                                                       | 1  | 18                     | 2  | <b><u>157</u></b>       | 42 | <b><u>177</u></b>       | 21  | <b><u>274</u></b>       | 14 | <b><u>339</u></b>       | 11 | 19                      | 15 | <b><u>331</u></b> | <b><u>867</u></b>  | <b><u>1406</u></b> |
| CD8 <sup>+</sup> PD-1 <sup>hi</sup> 1 $\times 10^3$ /1 | 5                                                                                                                       | 8  | <b><u>80</u></b>       | 4  | <b><u>172</u></b>       | 7  | 1                       | 0   | <b><u>378</u></b>       | 11 | <b><u>81</u></b>        | 1  | 5                       | 4  | 45                | <b><u>764</u></b>  | <b><u>601</u></b>  |
| CD8 <sup>+</sup> PD-1 <sup>hi</sup> 3 $\times 10^3$ /2 | 3                                                                                                                       | 5  | <b><u>287</u></b>      | 4  | <b><u>95</u></b>        | 87 | 164                     | 10  | <b><u>206</u></b>       | 2  | <b><u>361</u></b>       | 7  | 22                      | 8  | <b><u>138</u></b> | <b><u>994</u></b>  | <b><u>1205</u></b> |

| T cell subsets                                           | IFN- $\gamma$ ELISPOT NCI-3784 circulating T cell subsets after <i>in vitro</i> expansion (spots/2 $\times 10^4$ cells) |                   |                   |                   |                    |                    |
|----------------------------------------------------------|-------------------------------------------------------------------------------------------------------------------------|-------------------|-------------------|-------------------|--------------------|--------------------|
|                                                          | DC + irrel.                                                                                                             | DC+TMG3           | DC+TMG5           | DC+TMG8           | 3784 mel           | anti-CD3           |
| CD8 <sup>+</sup> PD-1 <sup>-</sup> 3.5 $\times 10^3$ /1  | 1                                                                                                                       | 5                 | 2                 | 9                 | <b><u>305</u></b>  | <b><u>1147</u></b> |
| CD8 <sup>+</sup> PD-1 <sup>-</sup> 3.5 $\times 10^3$ /2  | 2                                                                                                                       | 3                 | 2                 | 3                 | <b><u>109</u></b>  | <b><u>1478</u></b> |
| CD8 <sup>+</sup> PD-1 <sup>+</sup> 3.5 $\times 10^3$ /1  | 10                                                                                                                      | <b><u>178</u></b> | <b><u>57</u></b>  | <b><u>115</u></b> | <b><u>1003</u></b> | <b><u>1243</u></b> |
| CD8 <sup>+</sup> PD-1 <sup>+</sup> 3.5 $\times 10^3$ /2  | 7                                                                                                                       | <b><u>297</u></b> | <b><u>58</u></b>  | <b><u>201</u></b> | <b><u>1142</u></b> | <b><u>739</u></b>  |
| CD8 <sup>+</sup> PD-1 <sup>+</sup> 1.5 $\times 10^3$ /3  | 8                                                                                                                       | <b><u>149</u></b> | <b><u>314</u></b> | <b><u>196</u></b> | <b><u>792</u></b>  | <b><u>932</u></b>  |
| CD8 <sup>+</sup> PD-1 <sup>+</sup> 1.5 $\times 10^3$ /4  | 50                                                                                                                      | <b><u>280</u></b> | <b><u>118</u></b> | <b><u>325</u></b> | <b><u>1147</u></b> | <b><u>1277</u></b> |
| CD8 <sup>+</sup> PD-1 <sup>hi</sup> 1.5 $\times 10^3$ /1 | 1                                                                                                                       | <b><u>533</u></b> | 0                 | <b><u>273</u></b> | <b><u>1545</u></b> | <b><u>953</u></b>  |
| CD8 <sup>+</sup> PD-1 <sup>hi</sup> 1.5 $\times 10^3$ /2 | 0                                                                                                                       | <b><u>364</u></b> | <b><u>48</u></b>  | <b><u>581</u></b> | <b><u>1324</u></b> | <b><u>1427</u></b> |

The specified circulating T cell subsets were sorted from pretreatment PBMC from subjects NCI-3713 or NCI-3784. Replicates of each T cell population, each containing the number of T cells indicated, were expanded independently in separate culture vessels for 15 days and evaluated for recognition of autologous cells pulsed with the minimal mutated neoepitopes (NCI-3713), or with autologous DCs electroporated with NCI-3784 TMG3, 5, and 8, encoding for FLNA<sub>R>C</sub>, KIF16B<sub>L>P</sub>, and SON<sub>R>C</sub>, respectively (NCI-3784), and the corresponding autologous tumor cell lines. T cells cultured with autologous cells pulsed with DMSO or irrelevant TMG, and stimulated with plate-bound anti-CD3 were used as controls. The number of spots/2  $\times 10^4$  cells is shown. Reactivities >40 spots, and >than twice the background were considered positive and are shown underlined and bold. >500 spots is off-scale

## References

- 1 Vita, R. *et al.* The immune epitope database (IEDB) 3.0. *Nucleic acids research* **43**, D405-412, doi:10.1093/nar/gku938 (2015).
- 2 Rosenberg, S. A. *et al.* Durable complete responses in heavily pretreated patients with metastatic melanoma using T cell transfer immunotherapy. *Clinical cancer research : an official journal of the American Association for Cancer Research* **17**, 4550-4557, doi:10.1158/1078-0432.CCR-11-0116 (2011).
